# Supplementary material
Source: PubMed Central journal article supplement (PMC5893433)

**Supplemental Information for**  
**AMOEBA Polarizable Atomic Multipole Force Field for Nucleic Acids**

Changsheng Zhang,<sup>1</sup># Chao Lu,<sup>2</sup># Zhifeng Jing,<sup>1</sup> Chuanjie Wu,<sup>2</sup> Jean-Philip Piquemal,<sup>1,3</sup> Jay W.

Ponder,<sup>2</sup>\* Pengyu Ren<sup>1</sup>\*

<sup>1</sup> Department of Biomedical Engineering, The University of Texas at Austin,

Austin, Texas 78712, United States.

<sup>2</sup> Department of Chemistry, Washington University in Saint Louis, Saint Louis, Missouri 63130,

United States

3. Laboratoire de Chimie Théorique, Sorbonne Universités, UPMC, UMR7616 CNRS, Paris,  
France

## Table of Contents

|                                                                                                                                                                                   |           |
|-----------------------------------------------------------------------------------------------------------------------------------------------------------------------------------|-----------|
| <b>Supplementary methods:</b> .....                                                                                                                                               | <b>3</b>  |
| I. Stacking calculation in tetramer simulation analysis .....                                                                                                                     | <b>3</b>  |
| II. Karplus equations for $^3J$ coupling with $\beta$ , $\gamma$ , $\varepsilon$ , $\nu$ torsions .....                                                                           | <b>3</b>  |
| <b>Part I: DNA/RNA AMOEBA force field parameterization</b> .....                                                                                                                  | <b>4</b>  |
| Figure S1. DNA/RNA intra-molecular polarization group definition.....                                                                                                             | <b>4</b>  |
| Figure S2. Potential energy surfaces of sugar with respect to $\nu_0$ and $\nu_4$ . .....                                                                                         | <b>5</b>  |
| Figure S3. Comparison of AMOEBA and QM sugar puckering energy maps for dG and dT. ....                                                                                            | <b>5</b>  |
| Figure S4. Comparison of AMOEBA and QM sugar puckering energy maps for rG and rU. ....                                                                                            | <b>6</b>  |
| Figure S5. Nucleobases conformational energy profiles with the rotation of $\chi$ torsion. ....                                                                                   | <b>6</b>  |
| Figure S6. Nucleosides -C2'-O2'- torsional energy surfaces.....                                                                                                                   | <b>8</b>  |
| Figure S7. Nucleosides terminal C4'-C3'-O3'-HO3' and C4'-C5'-O5'-HO5' torsional energy surfaces. ..                                                                               | <b>9</b>  |
| Table S1. Stretch-torsion (A) and angle-torsion coupling (B) parameters for O4'-C1'-N-C6/C8 torsion. ....                                                                         | <b>10</b> |
| Figure S8. Model compound used for DNA/RNA backbone torsion parameterization. ....                                                                                                | <b>11</b> |
| Figure S9. The $\gamma$ (O5-C5-C4-C3) torsional energy profile using 2-Methyltetrahydrofuran phosphate as the model compound. ....                                                | <b>12</b> |
| Table S2. $\beta$ torsion determination using methyl ethyl phosphate as model compound. ....                                                                                      | <b>13</b> |
| <b>Part II: DNA/RNA simulations</b> .....                                                                                                                                         | <b>14</b> |
| Table S3. Simulation box content and size for DNA and RNA simulations.....                                                                                                        | <b>14</b> |
| Table S4. Simulation efficiency data of DNA and RNA systems on GPU. ....                                                                                                          | <b>17</b> |
| Figure S10. RMSD of RNA simulation structures was calculated by comparing with the first NMR structure.....                                                                       | <b>18</b> |
| Figure S11. Non-terminal heavy atom RMSD of DNA duplexes with respect to typical A-form structure (blue) and B-form structure (red) in aqueous solution. ....                     | <b>20</b> |
| Figure S12. Non-terminal heavy atom RMSD of simulated DNA duplexes with respect to typical A-form structure (blue) and B-form structure (red) in ethanol-water mixture. ....      | <b>22</b> |
| Figure S13 Comparison of Curves+ helicoidal parameters along the nucleotide position for DNA (1NAJ, 2HKB, 1D42, 1D20) and RNA (2JXQ) duplexes. ....                               | <b>25</b> |
| Figure S14 Comparison of Curves+ groove widths of 1NAJ, 2HKB and 2JXQ along nucleotide position between solution-phase simulation and NMR. ....                                   | <b>35</b> |
| Figure S15 Comparison of Curves+ helicoidal parameters along the nucleotide position between crystal simulation, solution simulation and X-ray for DNA (1D23) and RNA (1RNA)..... | <b>36</b> |
| Figure S16. The stability of the RNA terminal base-pairs or the capping base pair of hairpin stem. .                                                                              | <b>42</b> |
| Figure S17 Terminal base-pair breakup and reforming in 2JXQ and 2L8F simulation.....                                                                                              | <b>43</b> |
| Figure S18. Comparison of the simulation average values of RNA backbone torsions and $\chi$ torsion with the NMR values. ....                                                     | <b>44</b> |

|                                                                                                                                                        |    |
|--------------------------------------------------------------------------------------------------------------------------------------------------------|----|
| Table S5. Axis bend and groove parameters for the 4 RNA double helices calculated from simulated and NMR structures by using Curves+ program.....      | 48 |
| Figure S19. $\alpha$ and $\gamma$ torsion transitions in RNA nucleotide residues. ....                                                                 | 50 |
| Figure S20. UUCG loop RMSDs (all heavy atoms including backbone, sugar and base) were calculated by comparing with the first NMR (2KOC) structure..... | 51 |
| Figure S21. Statistical population density map for RNA ribose puckering. ....                                                                          | 52 |
| Table S6. UUCG loop torsion angles in simulation. ....                                                                                                 | 52 |
| Table S7. Basic structural characteristic of UUCG loop and H-bond populations in simulations using AMOEBA NA and AMBER force fields.....               | 54 |
| Table S8. Single strand RNA tetramer simulation structure clustering results.....                                                                      | 55 |
| Figure S22. Supposition of different RNA tetramer clusters.....                                                                                        | 56 |
| Figure S23. Single strand tetramer rCAAU simulation analysis. ....                                                                                     | 57 |
| Figure S24. Single strand tetramer rAAAA simulation analysis. ....                                                                                     | 58 |
| Figure S25. Single strand RNA tetramer RMSD was calculated by comparing the simulated structures with the standard A-form structure. ....              | 59 |
| Figure S26. Extension of the rAAAA simulation trajectory 3 and UUCG loop simulation 5. ....                                                            | 61 |
| Table S9. $\beta$ , $\gamma$ Major conformation ratios in RNA tetramer simulation.....                                                                 | 62 |
| Table S10. Calculated NOE distance data for the RNA single strand tetramers. ....                                                                      | 62 |
| Table S11. RDC data studied for HIV TAR. ....                                                                                                          | 69 |
| Figure S27. Correlation between calculated order parameters and the experimental values.....                                                           | 70 |
| Figure S28. Correlation coefficients between RDC calculated from the first 4 TAR PDB structures and the experimental values. ....                      | 71 |
| Figure S29. Correlation coefficients of calculated and experimental TAR RDC values. ....                                                               | 72 |
| Figure S30. Polarization energy of adenine stacking in single strand A form RNA. ....                                                                  | 73 |

## Supplementary methods:

### I. Stacking calculation in tetramer simulation analysis

The same as Turner [reference 111, D. E. Condon et al., J. Chem. Theory Comput. 11, 2729–2742 (2015)] suggested, the base-base stacking score contains three terms, center distance (d, Dscore), overlap ( $\omega$  angle, Oscore), and parallel ( $\Xi$  angle, Pscore).

Stacking score = (Dscore + Oscore)×Pscore;

Dscore= 1, if (d<3.5Å); 0, if (d>5.0); (1.0/d<sup>3</sup>-1.0/125)\*65.2588, else

Oscore=1, if ( $\omega$ <25); 0, if ( $\omega$ >50); 2- $\omega$ /25.0, else

Pscore=1 if ( $\Xi$ <45); -1 else

Percentage of base stacking observed in MD simulations:

### II. Karplus equations for <sup>3</sup>J coupling with $\beta$ , $\gamma$ , $\epsilon$ , $\nu$ torsions

$$\beta \text{ vs } J_{H5'-P}^3 \text{ \& } J_{H5''-P}^3: \quad J_{H5'-P}^3 = \frac{1}{N} \sum_{i=1}^N 15.3 \cos^2(\beta_i - 120^\circ) - 6.1 \cos(\beta_i - 120^\circ) + 1.6;$$
$$J_{H5''-P}^3 = \frac{1}{N} \sum_{i=1}^N 15.3 \cos^2(\beta_i + 120^\circ) - 6.1 \cos(\beta_i + 120^\circ) + 1.6$$

$$\epsilon \text{ vs } J_{H3'-P}^3: \quad J_{H3'-P}^3 = \frac{1}{N} \sum_{i=1}^N 15.3 \cos^2(\epsilon_i + 120^\circ) - 6.1 \cos(\epsilon_i + 120^\circ) + 1.6$$

$$\gamma \text{ vs } J_{H4'-H5'}^3 \text{ \& } J_{H4'-H5''}^3: \quad J_{H4'-H5'}^3 = \frac{1}{N} \sum_{i=1}^N 9.7 \cos^2(\gamma_i - 120^\circ) - 1.8 \cos(\gamma_i - 120^\circ);$$
$$J_{H4'-H5''}^3 = \frac{1}{N} \sum_{i=1}^N 9.7 \cos^2(\gamma_i) - 1.8 \cos(\gamma_i)$$

$$\nu \text{ vs } J_{\nu}^3: \quad J_{\nu}^3 = \frac{1}{N} \sum_{i=1}^N 9.67 \cos^2(\nu) - 2.03 \cos(\nu)$$



## Part I: DNA/RNA AMOEBA force field parameterization

Figure S1. DNA/RNA intra-molecular polarization group definition.

The multipole and torsional parameters for DNA/RNA C5'-O5'-P-O3' and C3'-O3'-P-O5' were directly transferred from DMP (dimethyl phosphate) and these atoms are kept in the same group.

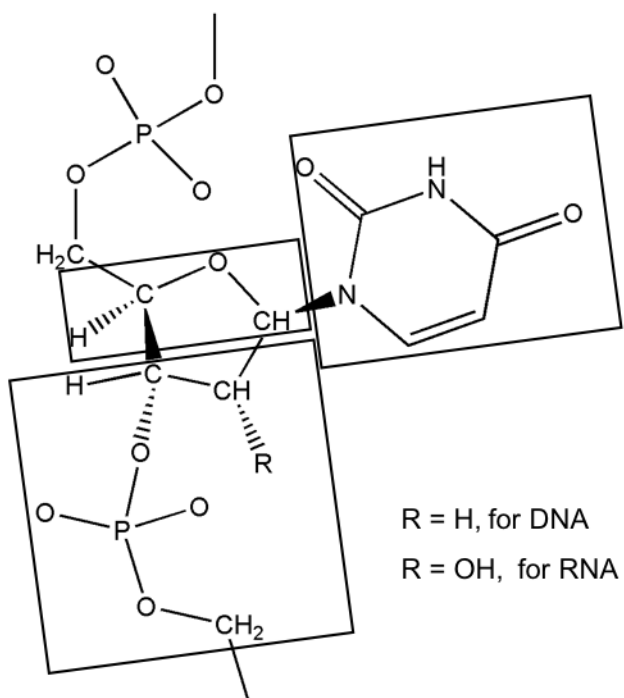

Figure S2. Potential energy surfaces of sugar with respect to  $\nu_0$  and  $\nu_4$ .

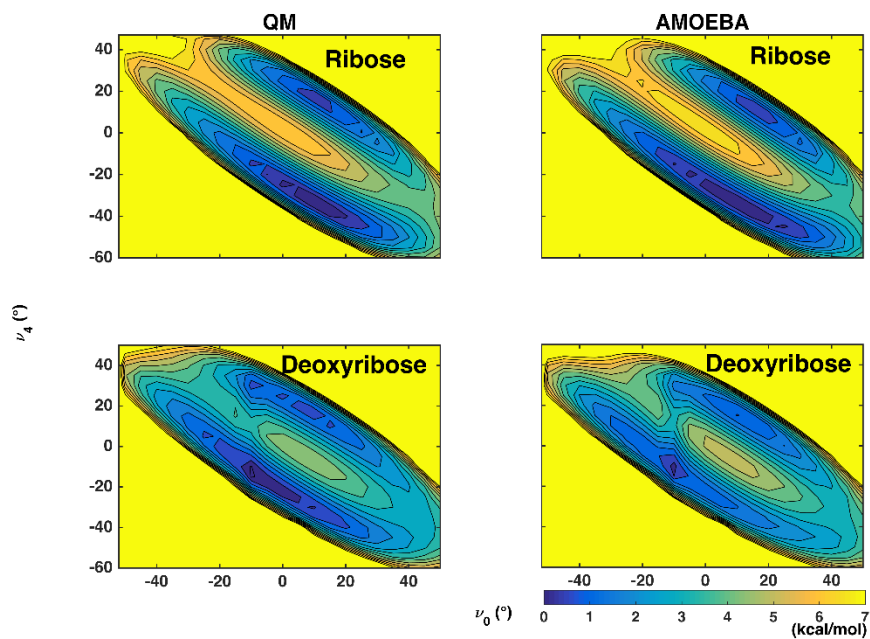

Figure S3. Comparison of AMOEBA and QM sugar puckering energy maps for dG and dT.

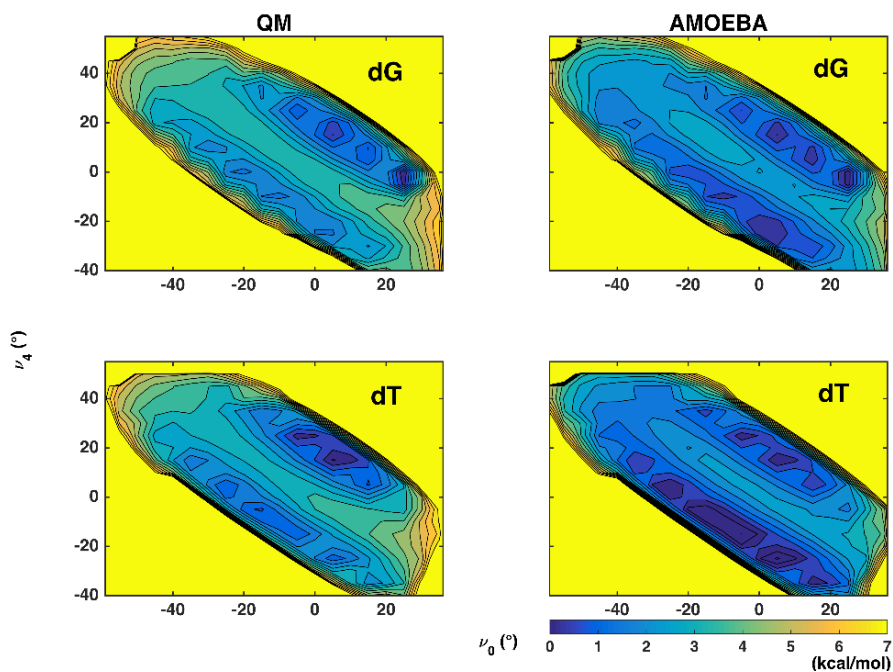

Figure S4. Comparison of AMOEBA and QM sugar puckering energy maps for rG and rU.

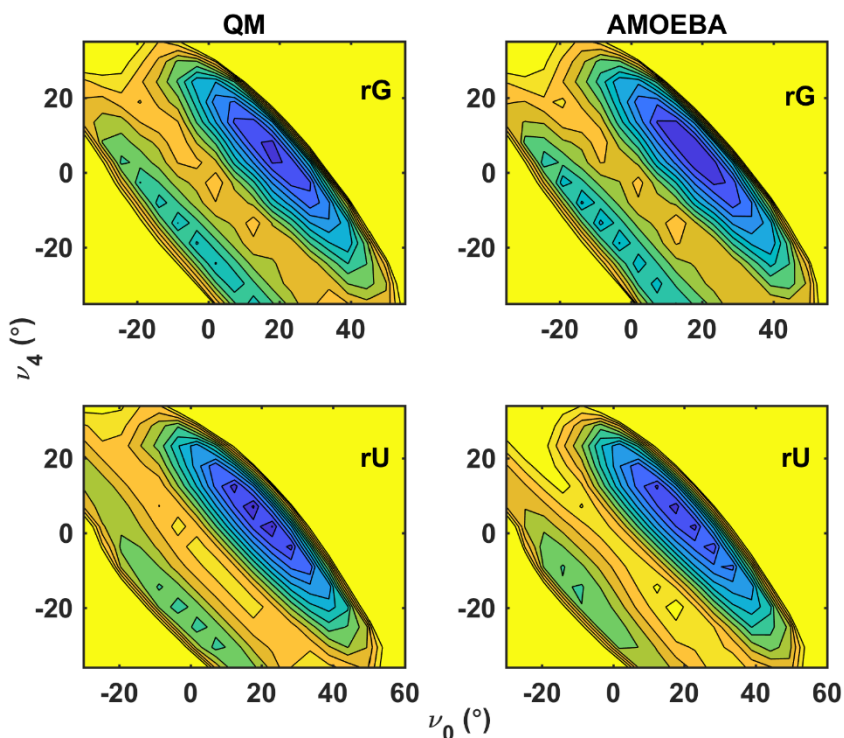

Figure S5. Nucleobases conformational energy profiles with the rotation of  $\chi$  torsion.

(A) deoxyribonucleosides (B) ribonucleosides. The (deoxy)ribose sugar was fixed at (C3') C2' endo conformation in both QM (MP2/6-311G(1d,1p), black plus)) and AMOEBA (red circle) calculations. The  $\chi$  torsion is defined by O4'-C1'-N1-C2 for pyrimidines and O4'-C1'-N9-C4 for purines.

(A)

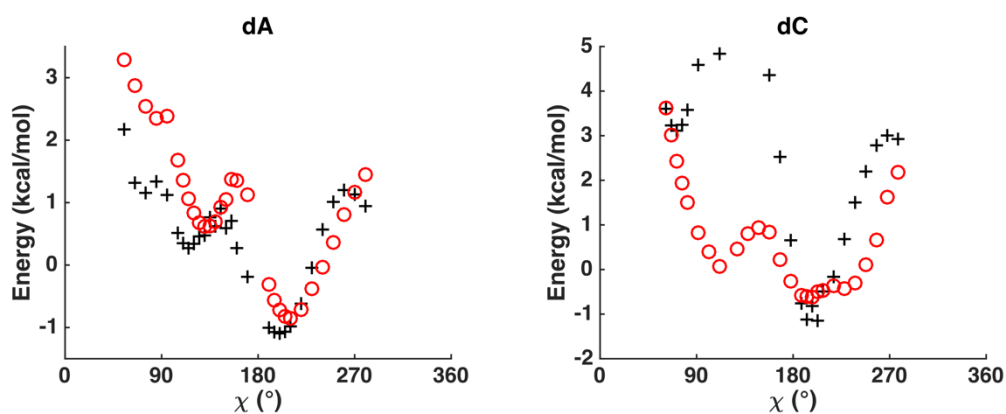

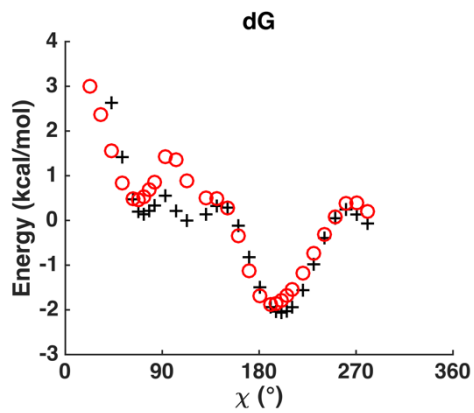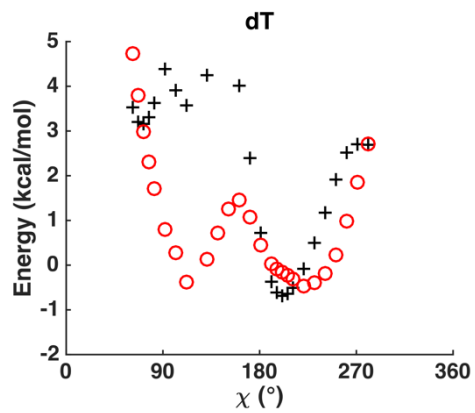

(B)

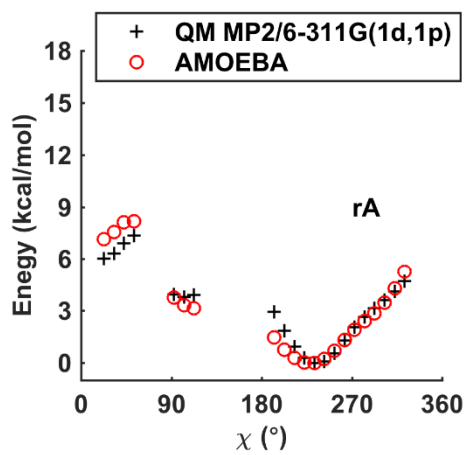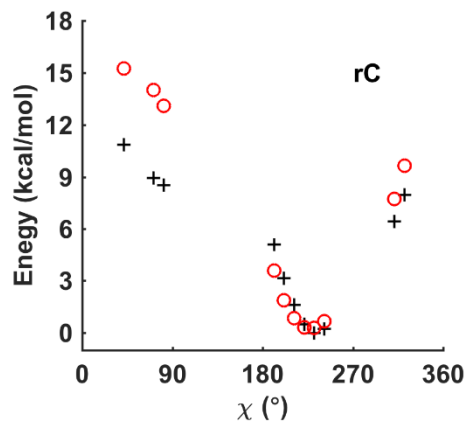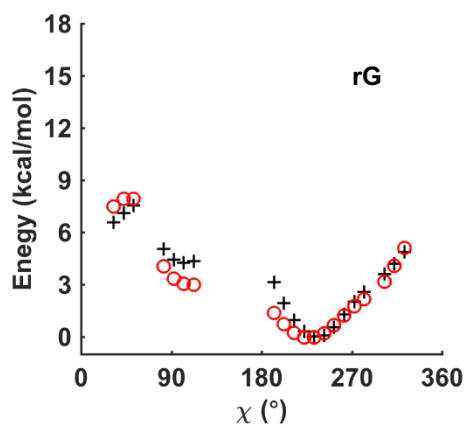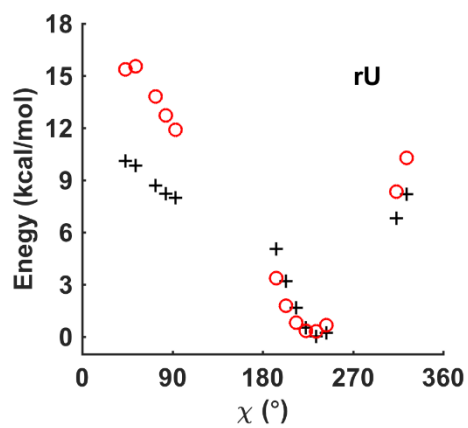

Figure S6. Nucleosides -C2'-O2'- torsional energy surfaces.

The ribose sugar was fixed at C3' endo conformation for both QM (MP2/6-311G(1d,1p), black plus) and AMOEBA calculation (red circle).

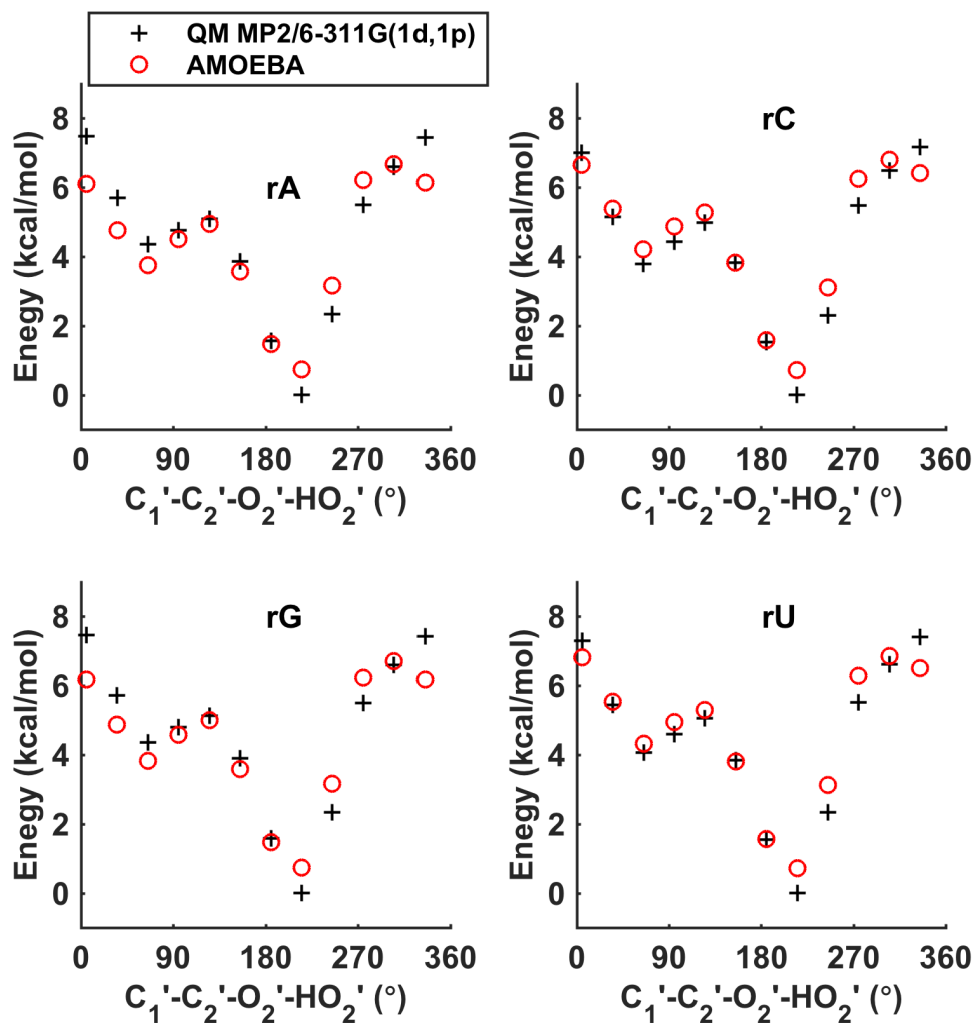

Figure S7. Nucleosides terminal C4'-C3'-O3'-HO3' and C4'-C5'-O5'-HO5' torsional energy surfaces.

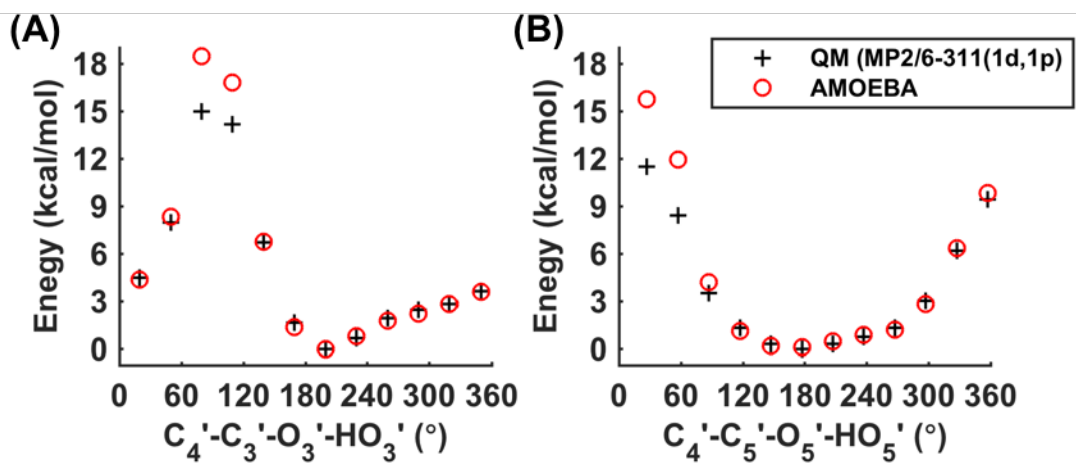

**Table S1. Stretch-torsion (A) and angle-torsion coupling (B) parameters for O4'-C1'-N-C6/C8 torsion.**

The coupling energy equations are:

$$U_{\text{angtor}}(\chi, a_1, a_2) = \sum_{m=1}^2 \sum_{n=1}^3 k_{\text{angtor},mn} (a_m - a_{m0}) [1 + \cos(n\chi + \phi_n)] \quad \phi_1 = \phi_3 = 0, \phi_2 = \pi$$

$$U_{\text{strtor}}(\chi, b_1, b_2, b_3) = \sum_{m=1}^3 \sum_{n=1}^3 k_{\text{strtor},mn} (b_m - b_{m0}) [1 + \cos(n\chi + \phi_n)] \quad \phi_1 = \phi_3 = 0, \phi_2 = \pi$$

(A)

| $m \backslash n$ | 1 (C6/C8-N-C1')        | 2 (N-C1'-O4')           |
|------------------|------------------------|-------------------------|
| 1                | 0.014 kcal/mol/degree  | 0                       |
| 2                | 0                      | 0                       |
| 3                | -0.058 kcal/mol/degree | -0.0110 kcal/mol/degree |

(B)

| $m \backslash n$ | 1 (C6/C8-N)    | 2 (N-C1')       | 3 (C1'-O4')    |
|------------------|----------------|-----------------|----------------|
| 1                | 0              | 0               | 0              |
| 2                | 0              | 0               | 0              |
| 3                | 1.5 kcal/mol/Å | -4.0 kcal/mol/Å | 5.2 kcal/mol/Å |

**Figure S8. Model compound used for DNA/RNA backbone torsion parameterization.**

**(A) Deoxyribose 3,5-bis (methyl phosphate) for DNA  $\beta$ ,  $\gamma$ , and  $\epsilon$  torsions. (B) MEP (Methyl ethyl phosphate) for RNA  $\beta$  torsion. (C) MHFP (2-Methyltetrahydrofuran phosphate) for RNA  $\gamma$  torsion. (D) Ribose 3,5-bis (methyl phosphate) for RNA  $\epsilon$  torsion.**

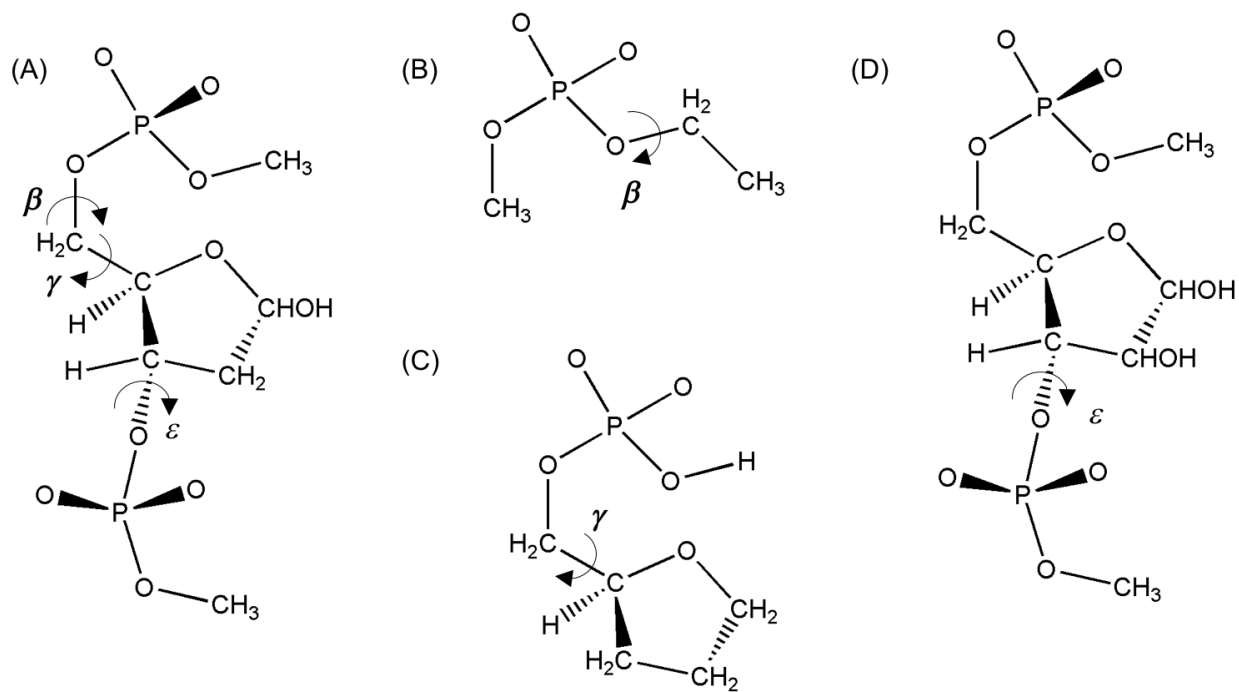



Figure S9. The  $\gamma$  (O5-C5-C4-C3) torsional energy profile using 2-Methyltetrahydrofuran phosphate as the model compound.

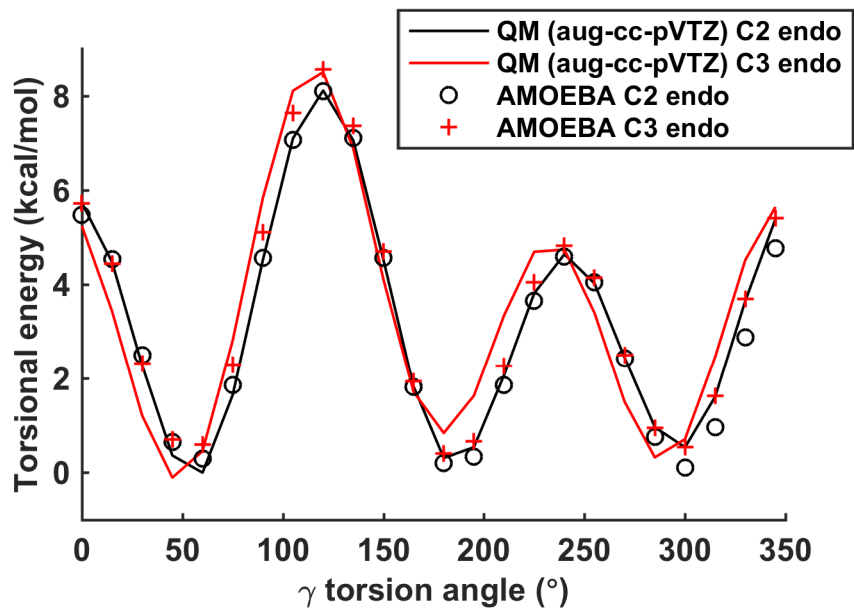

**Table S2.  $\beta$  torsion determination using methyl ethyl phosphate as model compound.**

**(A) QM, statistical potential energy and the AMOEBA energy with different force constants. RNA PDB structures (no protein binding) were used for the statistical energy calculation. A torsional histogram with a  $10^\circ$  bin from  $0$ - $360^\circ$  were calculated, and then statistical potential energy was calculated by taking the logarithm of the frequency ( $\rho$ ) and times with  $kT$ . (B)  $\beta$   $^3J$  coupling on tetramers using soft (torsion force constant = $0$ ) and rigid (torsion force constant = $1.905$ ) torsion parameter ( $^3J_{H5'-P}$  &  $^3J_{H5''-P}$ ). A  $1.0$ - $\mu s$  simulation for each tetramer was used for the testing.**

(A)

| Torsion angles (P-O-C-C) | MEP (QM) | Statistic ( $kT \times \ln \rho$ ) | $\beta$ torsion constant $k_2 = 0$ kcal/mol | $\beta$ torsion constant $k_2 = 1.905$ kcal/mol |
|--------------------------|----------|------------------------------------|---------------------------------------------|-------------------------------------------------|
| 180                      | 0        | 0                                  | 0                                           | <b>0</b>                                        |
| 150,210                  | 0.355    | 1.142                              | 0.435                                       | <b>0.910</b>                                    |
| 120,240                  | 0.752    | 1.847                              | 0.746                                       | <b>2.175</b>                                    |
| 90,270                   | 0.907    | 2.348                              | 0.894                                       | <b>2.799</b>                                    |
| 60,300                   | 2.574    | 3.262                              | 3.361                                       | <b>4.790</b>                                    |

(B)

|           | CAAU (1.905) | CAAU (0) | CAAU (NMR)   | AAAA (cal) | AAAA (0) | AAAA (NMR) | GACC (cal) | GACC (0) | GACC (NMR) |
|-----------|--------------|----------|--------------|------------|----------|------------|------------|----------|------------|
| $\beta_2$ | 3.1, 3.0     | 7.4,5.9  | 3.7, 2,2     | 3.4, 2.1   | 3.5,2.1  | 3.8, 1.0   | 3.9, 1.8   | 4.1,1.8  | 3.7, 0.9   |
| $\beta_3$ | 3.1, 2.7     | 4.7,2.2  | 3.5, <1      | 2.7, 2.5   | 2.8,2.5  | 3.0, 1.0   | 3.1, 2.2   | 3.4,2.1  | 4.0, 2.0   |
| $\beta_4$ | 5.4, 3.6     | 10.5,7.8 | 3.8-4.3, 3.3 | 4.4, 2.9   | 6.0,5.9  | 3.2, 1.0   | 8.1, 6.2   | 10.1,8.7 | 4.4, 2.0   |

## Part II: DNA/RNA simulations

**Table S3. Simulation box content and size for DNA and RNA simulations.**

(A) Simulations for DNA/RNA in water solution

| Type                        | PDB  | Water/Na+/Cl- number | Cubic box side length for NVT simulation (Å) |
|-----------------------------|------|----------------------|----------------------------------------------|
| RNA double chain (Duplex)   | 2JXQ | 8323/34/16           | 63.577                                       |
|                             | 1MIS | 6178/26/12           | 57.649                                       |
|                             | 1F5G | 9216/36/18           | 65.534                                       |
|                             | 2L8F | 11220/42/22          | 69.807                                       |
|                             | 1RNA | 10030/46/20          | 72.900                                       |
| RNA single chain (Hairpin)  | 2KOC | 6327/25/12           | 57.956                                       |
|                             | 1ZIH | 5758/22/11           | 56.389                                       |
|                             | 1SZY | 10804/41/21          | 69.360                                       |
| DNA double helices in water | 1D42 | 9219/16/2 (A-form)   | 66.950 (A-form)                              |
|                             |      | 6984/16/2 (B-form)   | 61.408 (B-form)                              |
|                             | 1D20 | 8054/36/18 (A-form)  | 62.700 (A-form)                              |
|                             |      | 8040/36/18 (B-form)  | 62.700 (B-form)                              |

|  |      |                     |                 |
|--|------|---------------------|-----------------|
|  | 1NAJ | 8423/40/18 (A-form) | 63.712 (A-form) |
|  |      | 8234/40/18 (B-form) | 63.250 (B-form) |
|  | 2HKB | 7966/40/18 (A-form) | 62.550 (A-form) |
|  |      | 8001/40/18 (B-form) | 62.650 (B-form) |
|  | 1D23 | 7209/32/14(B-form)  | 65.493 (B-form) |

(B) DNA Duplex in Ethanol/Water Mixture

| PDB  | Ethanol/Water/Na+/ Cl-<br>number | Cubic box side length for<br>NVT simulation (Å) |
|------|----------------------------------|-------------------------------------------------|
| 1D42 | 2053/654/16/2 (A-form)           | 60.400 (A-form)                                 |
|      | 2053/654/14 (B-form)             | 60.400 (B-form)                                 |
| 1D20 | 2409/781/18 (A-form)             | 63.720 (A-form)                                 |
|      | 2415/783/18 (B-form)             | 62.700 (B-form)                                 |
| 1NAJ | 2464/810/22 (A-form)             | 64.345 (A-form)                                 |
|      | 2459/807/22 (B-form)             | 64.296 (B-form)                                 |
| 2HKB | 2366/770/22 (A-form)             | 63.400 (A-form)                                 |
|      | 2359/785/22 (B-form)             | 63.400 (B-form)                                 |

(C) Crystal simulations

| Type       | PDB  | Cell  | NA/Water/ions                          | Box size (Å)         |
|------------|------|-------|----------------------------------------|----------------------|
| Z-form DNA | 1LJX | unit  | 1 DNA/359 water /24 Na+                | 21.182×28.363×44.440 |
|            | 292D | unit  | 1DNA/339 water /16 Na+                 | 17.940×31.230×44.550 |
| B-form DNA | 1D23 | unit  | 4 DNA/1072 water/36 Mg <sup>2+</sup>   | 38.930×39.630×33.300 |
|            | 1D23 | 2×2×2 | 32 DNA/8578 water/288 Mg <sup>2+</sup> | 77.860×39.630×33.300 |
| RNA        | 1RNA | unit  | 4 RNA/1537 water/104 Na+               | 34.110×44.610×49.110 |
|            | 1RNA | 2×2×2 | 32 RNA/12300 water/832 Na+             | 68.220×89.220×98.220 |

**Table S4. Simulation efficiency data of DNA and RNA systems on GPU.**

**All simulations were performed with a 3-fs time step and heavy hydrogen, polarization convergence of  $10^{-4}$  Debye/atom, using NVIDIA GTX1070. For comparison, the simulation speed for the DHFR system (23558 atoms) with 3-fs time step and AMBER force field on Nvidia GTX 1070 is ~300 ns/day.**

| DNA/RNA Systems   | Number of atoms | Simulation speed (ns/day) |
|-------------------|-----------------|---------------------------|
| rCAAU             | 11381           | 21.9                      |
| 2KOC              | 19465           | 13.8                      |
| 2JXQ              | 25661           | 10.6                      |
| TAR               | 63128           | 4.8                       |
| 1NAJ              | 25518           | 10.9                      |
| 1D42              | 21478           | 12.6                      |
| 1D20              | 24807           | 10.9                      |
| 2HKB              | 24818           | 10.5                      |
| 1D23 (unit cell)  | 5780            | 30                        |
| 1RNA (super cell) | 65892           | 3.5                       |

Figure S10. RMSD of RNA simulation structures was calculated by comparing with the first NMR structure.

Terminal residues are not included.

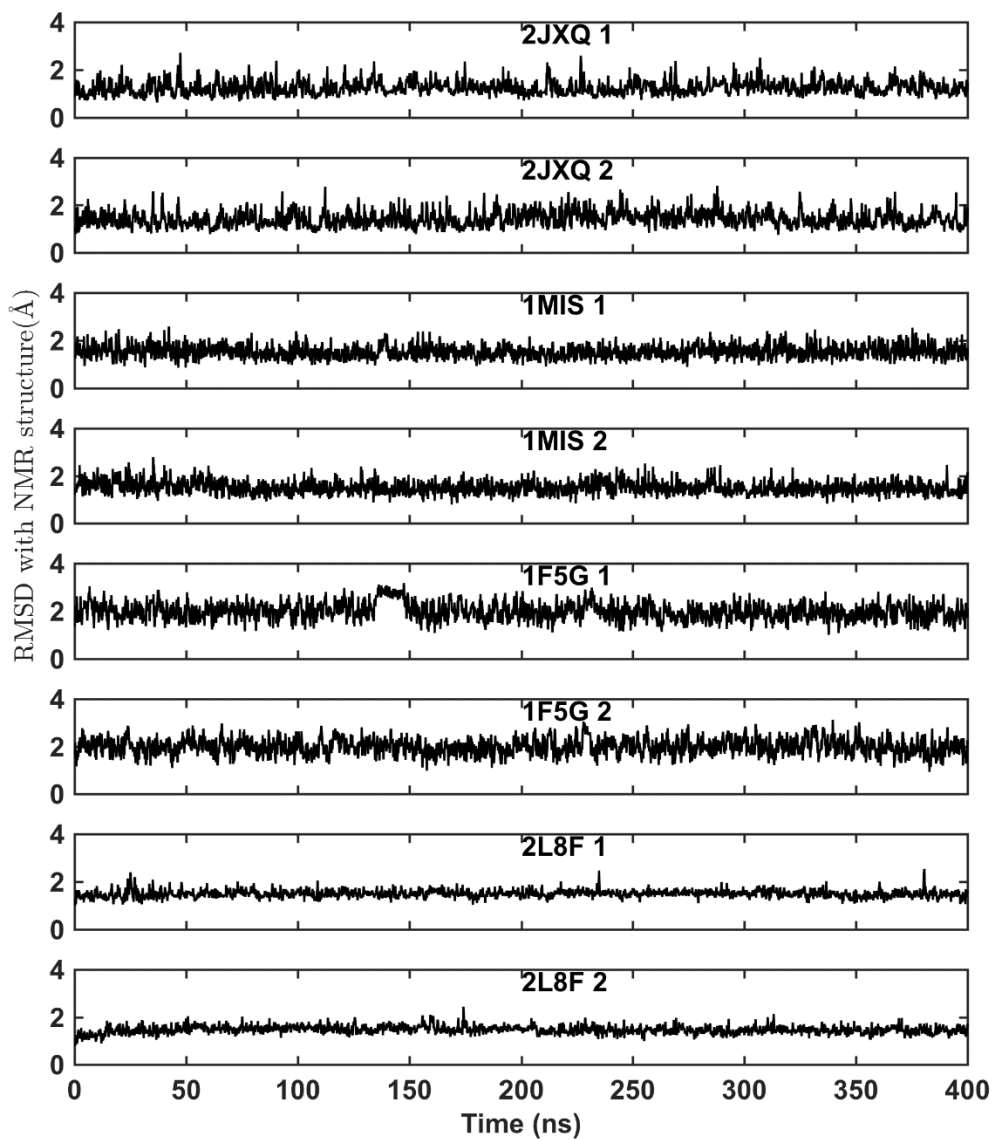

(A) RNA Duplex

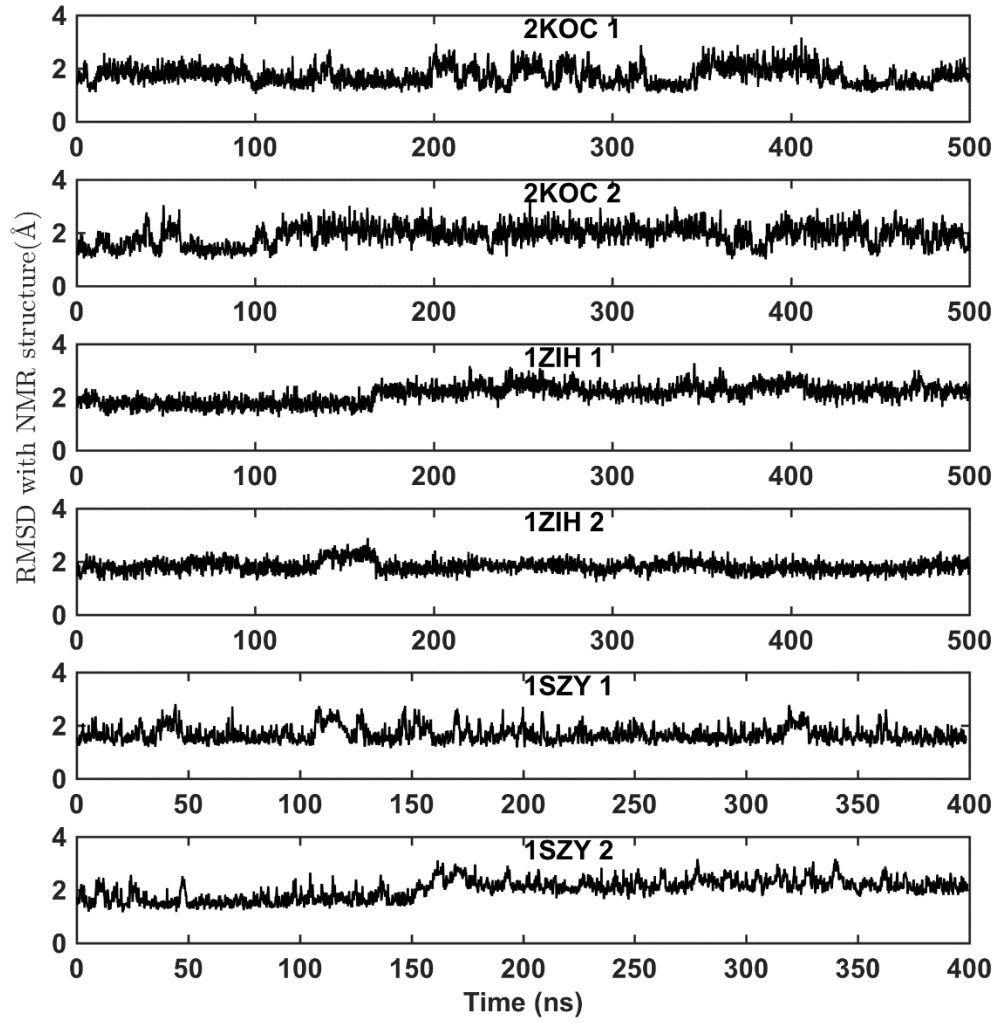

(B) RNA hairpin loops



**Figure S11. Non-terminal heavy atom RMSD of DNA duplexes with respect to typical A-form structure (blue) and B-form structure (red) in aqueous solution.**

**(A) The simulation started with A-form structure. (B) The simulation started with B-form structure.**

(A)

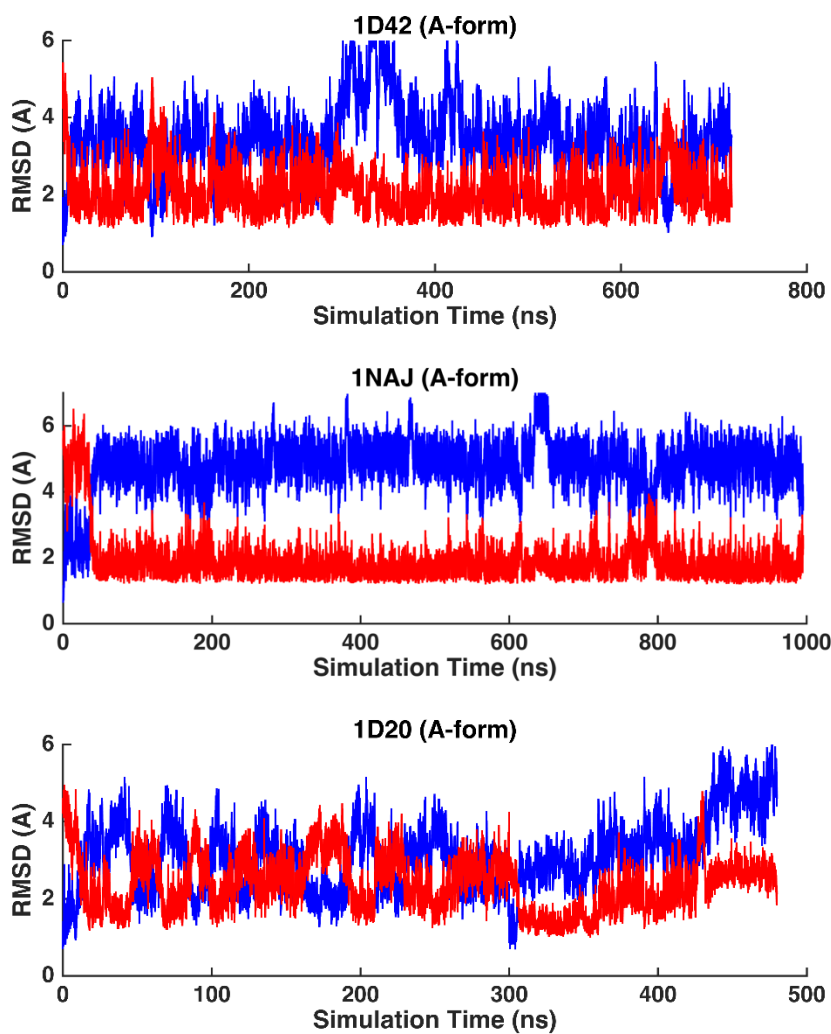

(B)

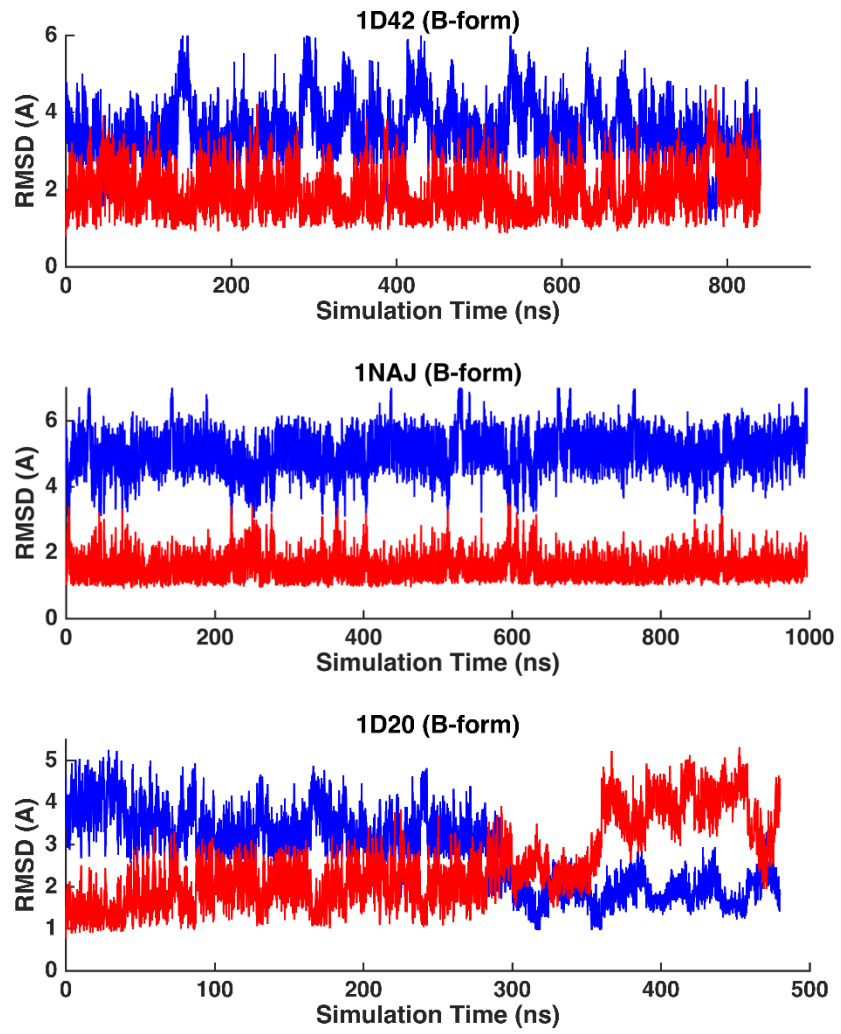

Figure S12. Non-terminal heavy atom RMSD of simulated DNA duplexes with respect to typical A-form structure (blue) and B-form structure (red) in ethanol-water mixture.

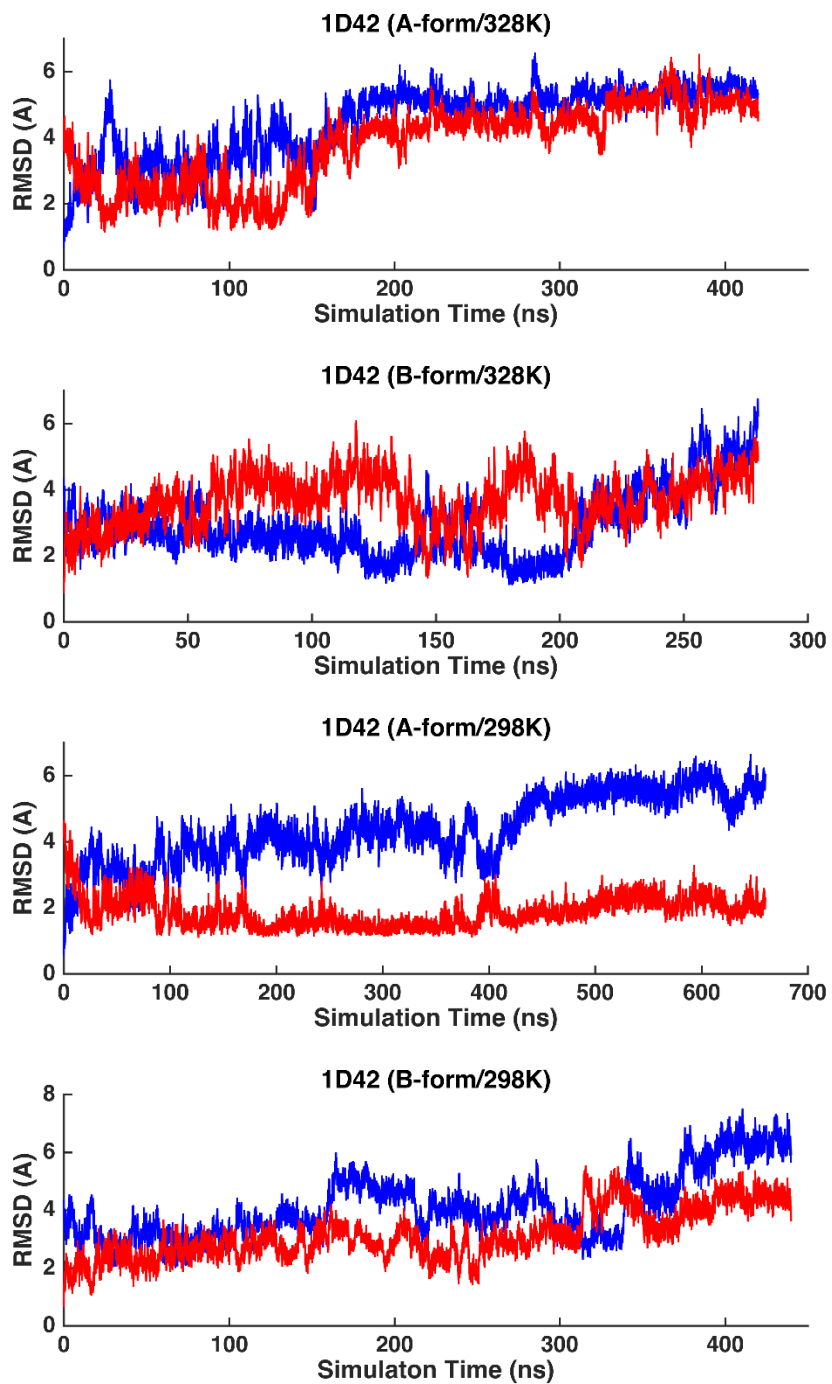

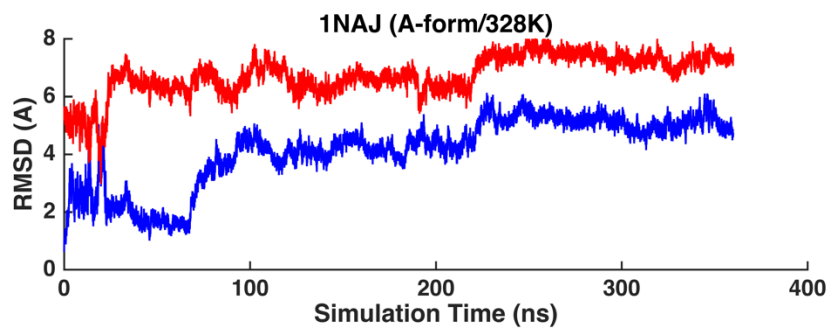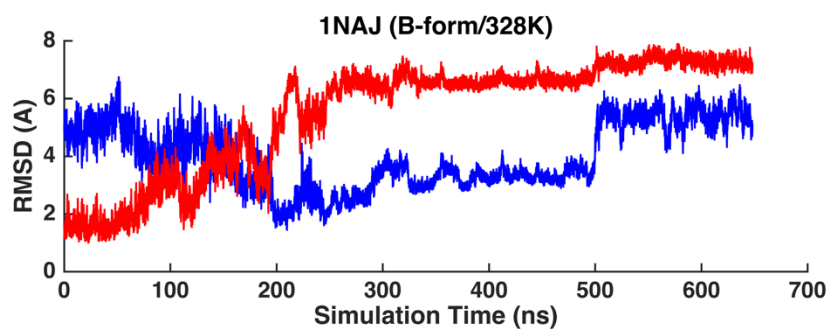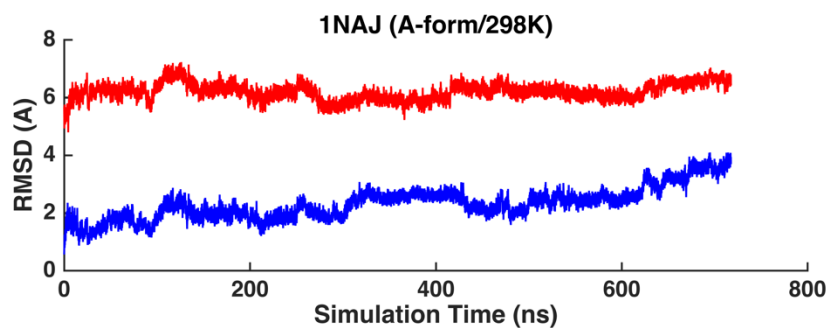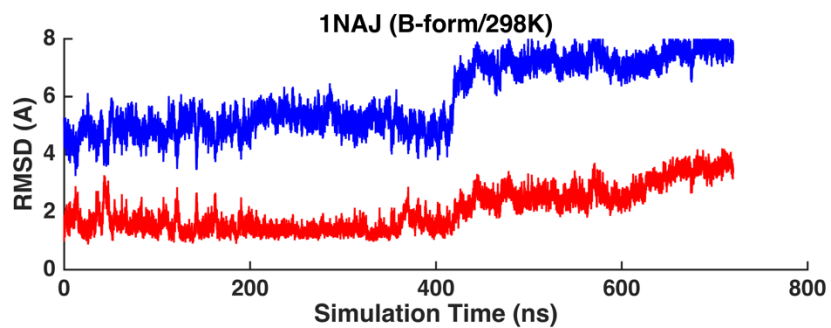

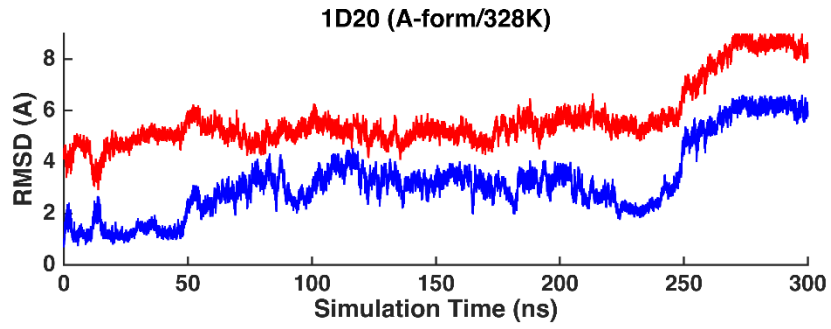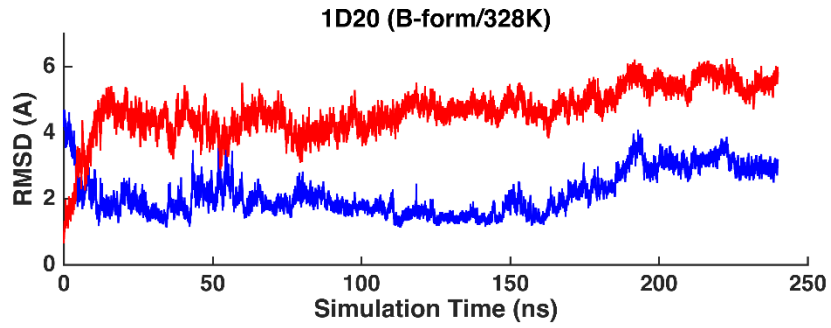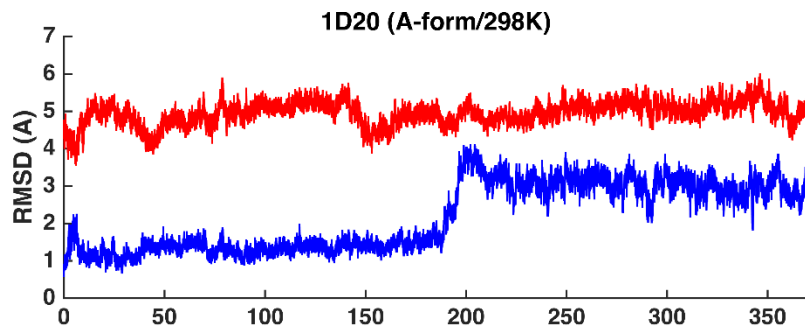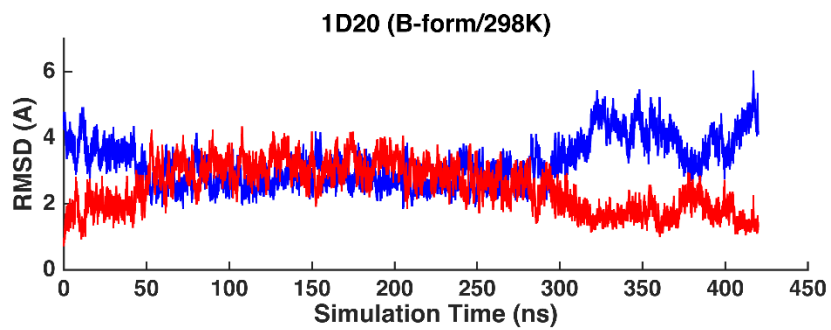

**Figure S13 Comparison of Curves+ helicoidal parameters along the nucleotide position for DNA (1NAJ, 2HKB, 1D42, 1D20) and RNA (2JXQ) duplexes.**

The parameters were computed using structures from solution-phase simulations (black) and NMR structures (red). See the method for Curves+ calculations in reference 109.

(A)

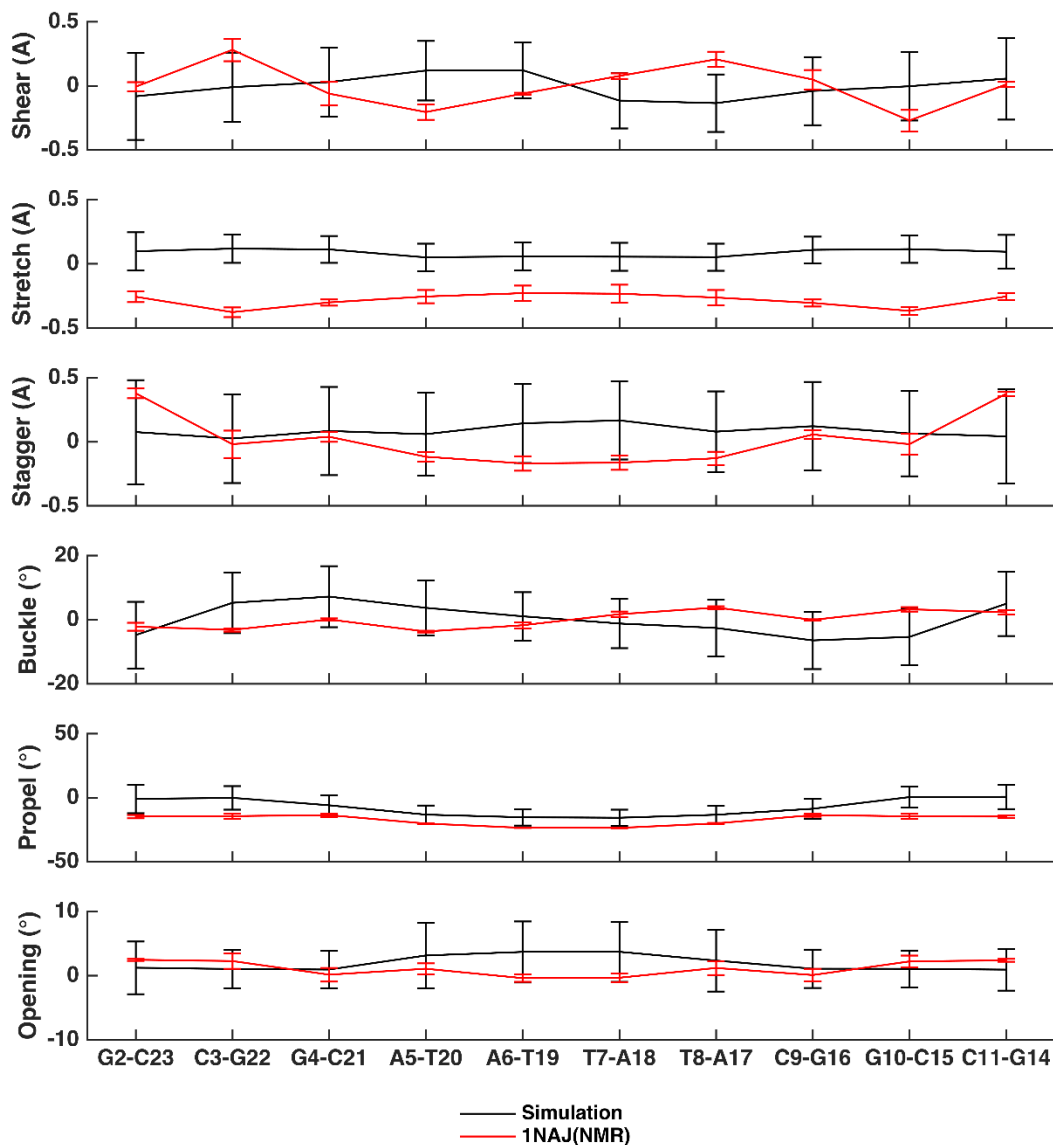

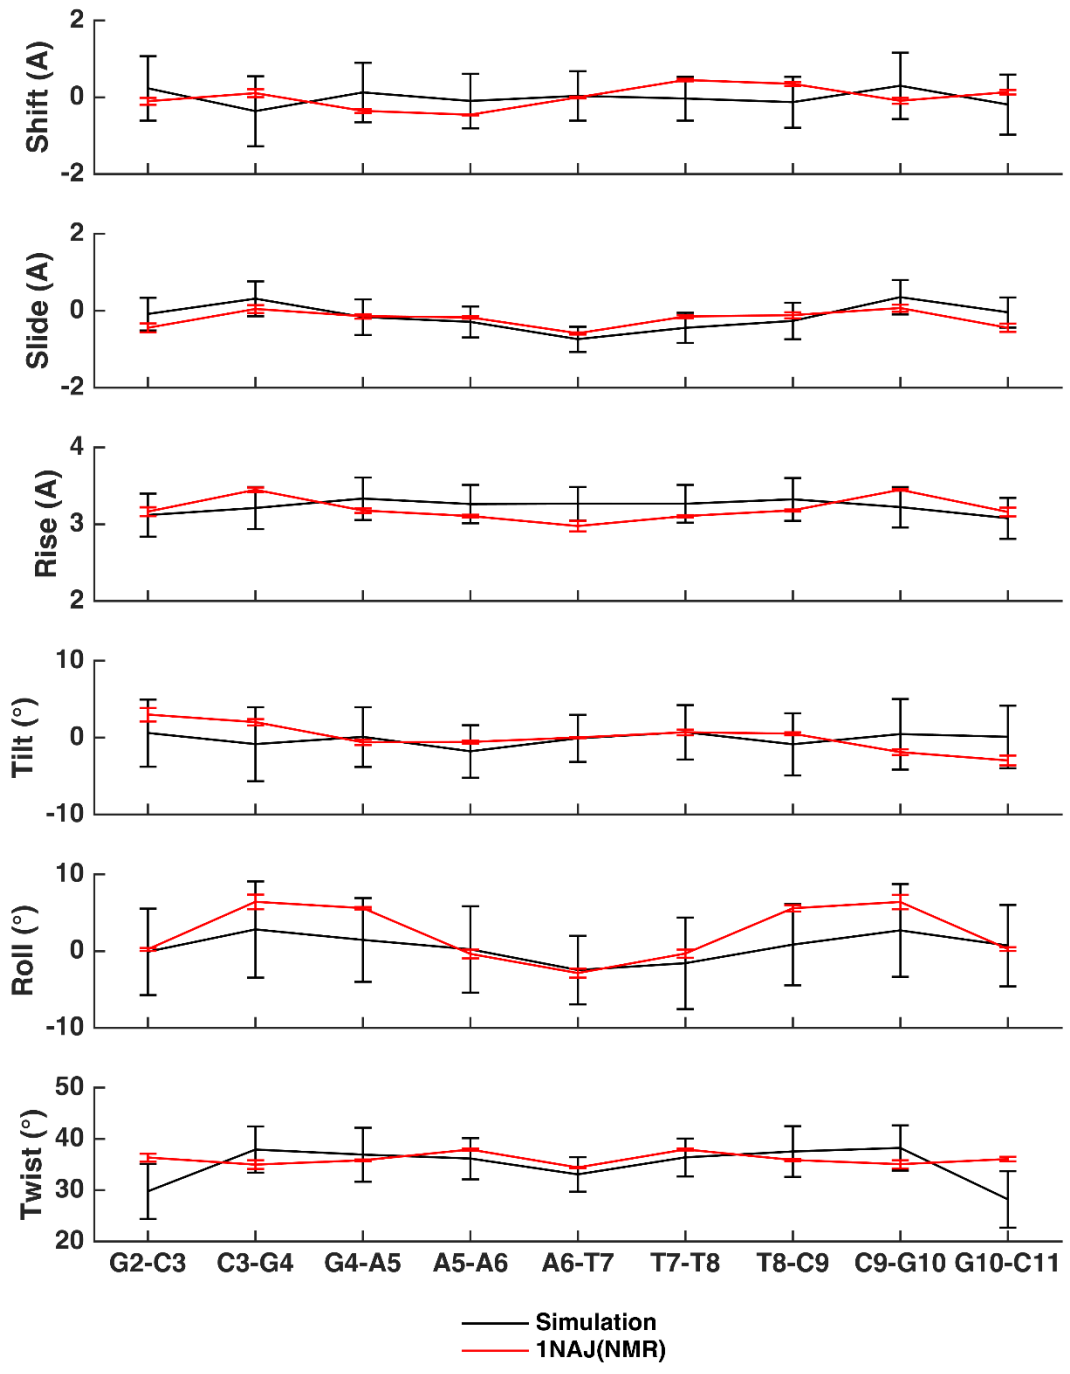

(B)

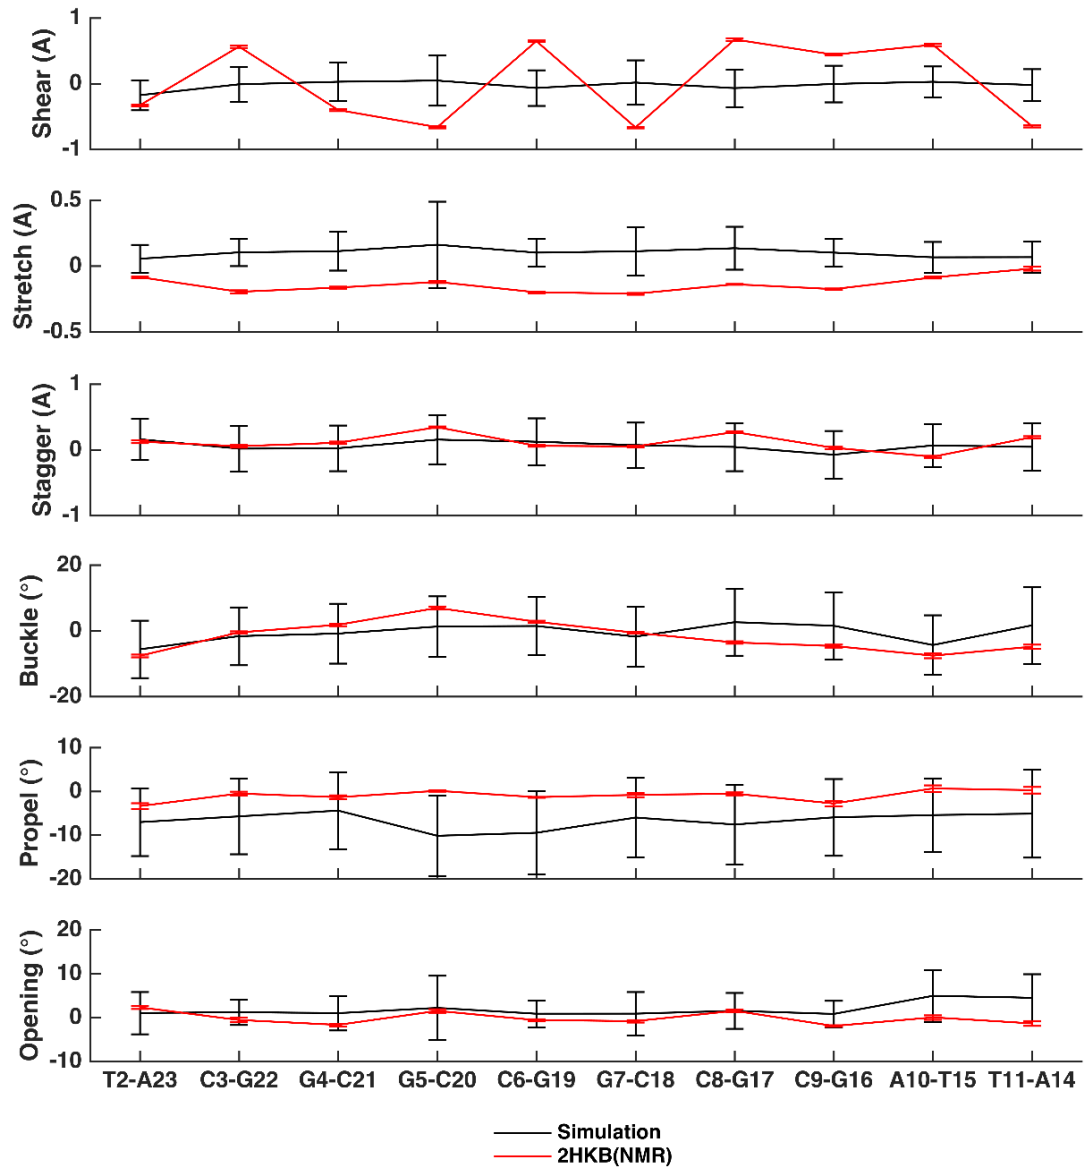



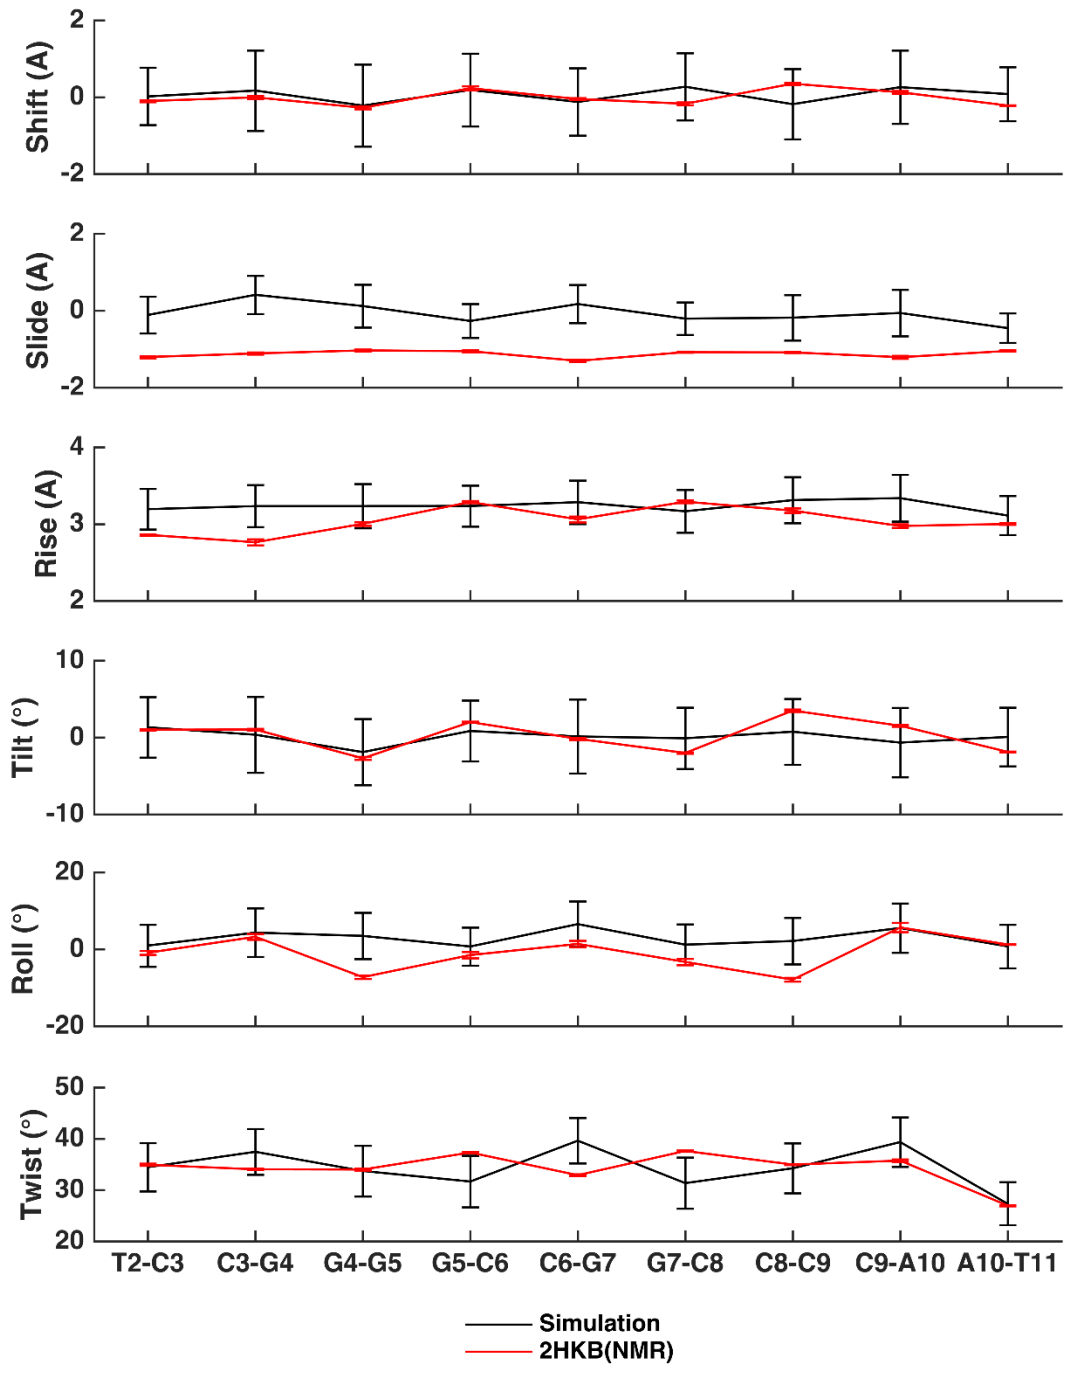

(C)

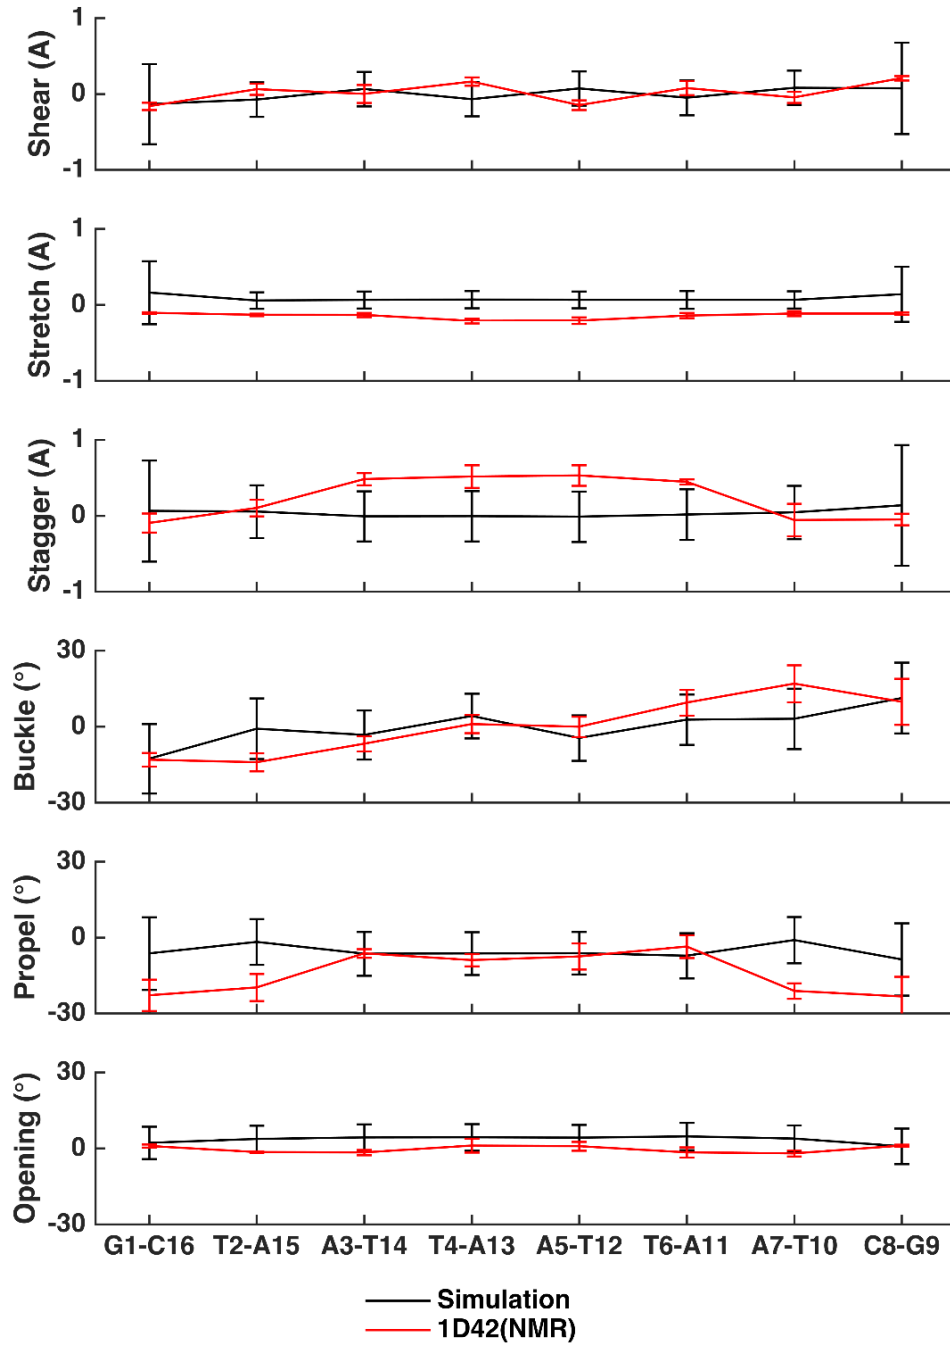

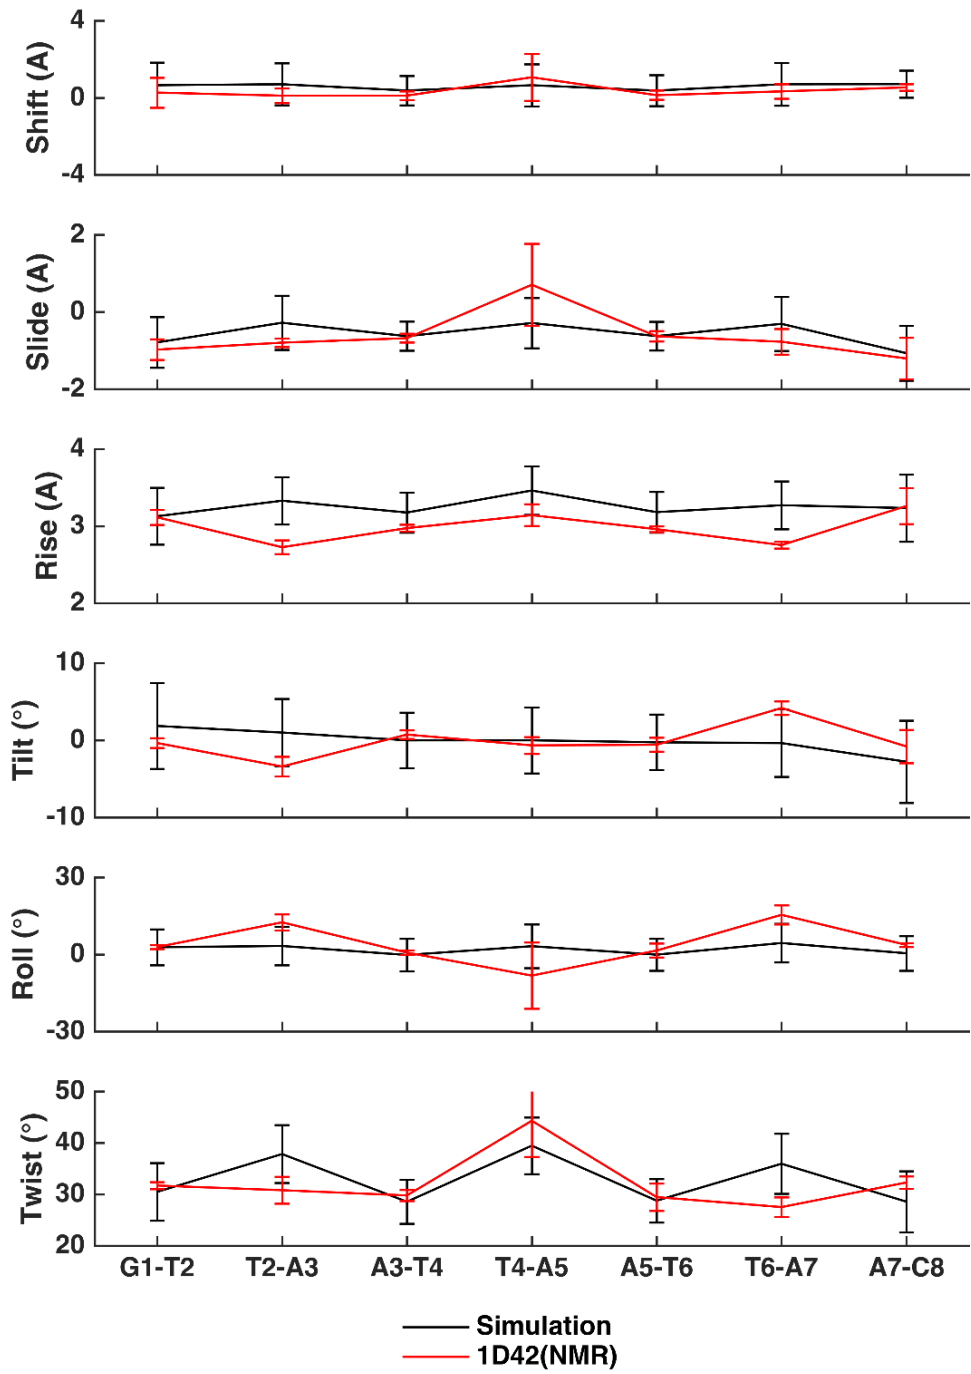

(D)

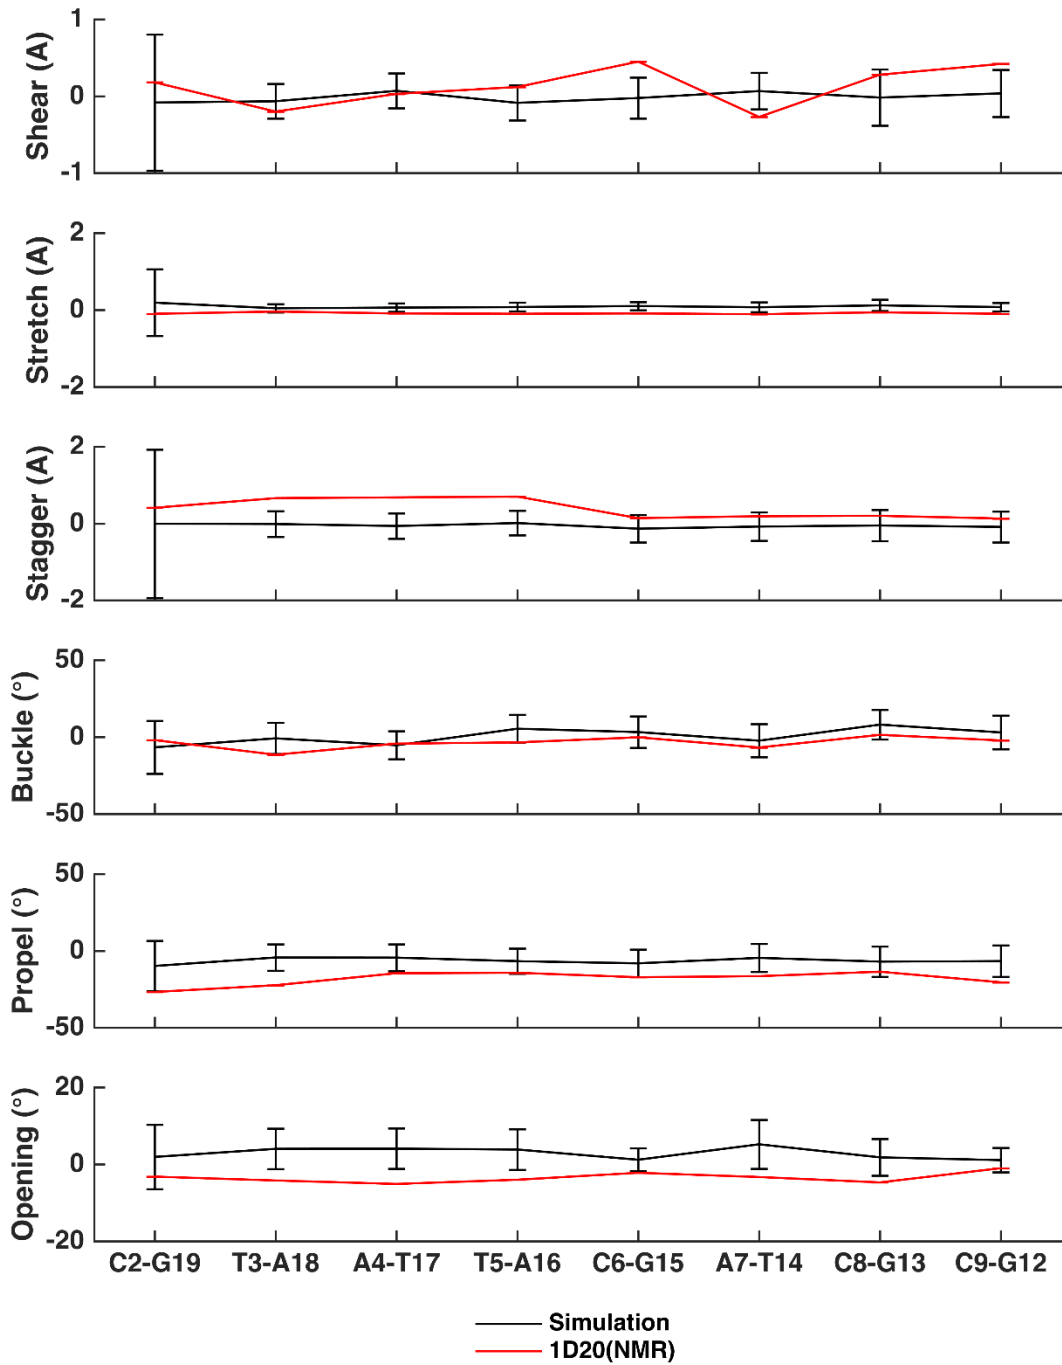

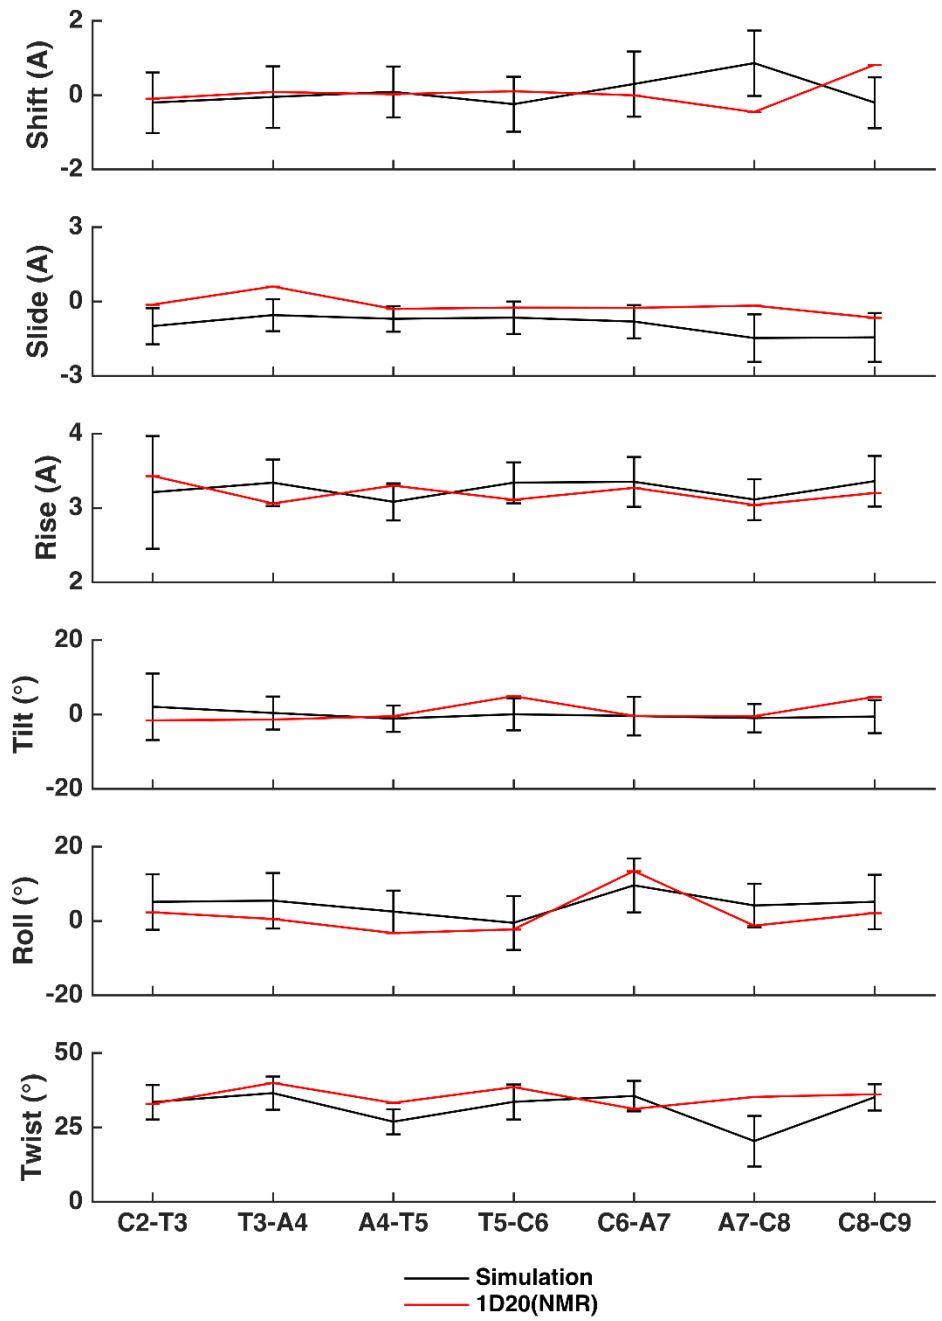

(E)

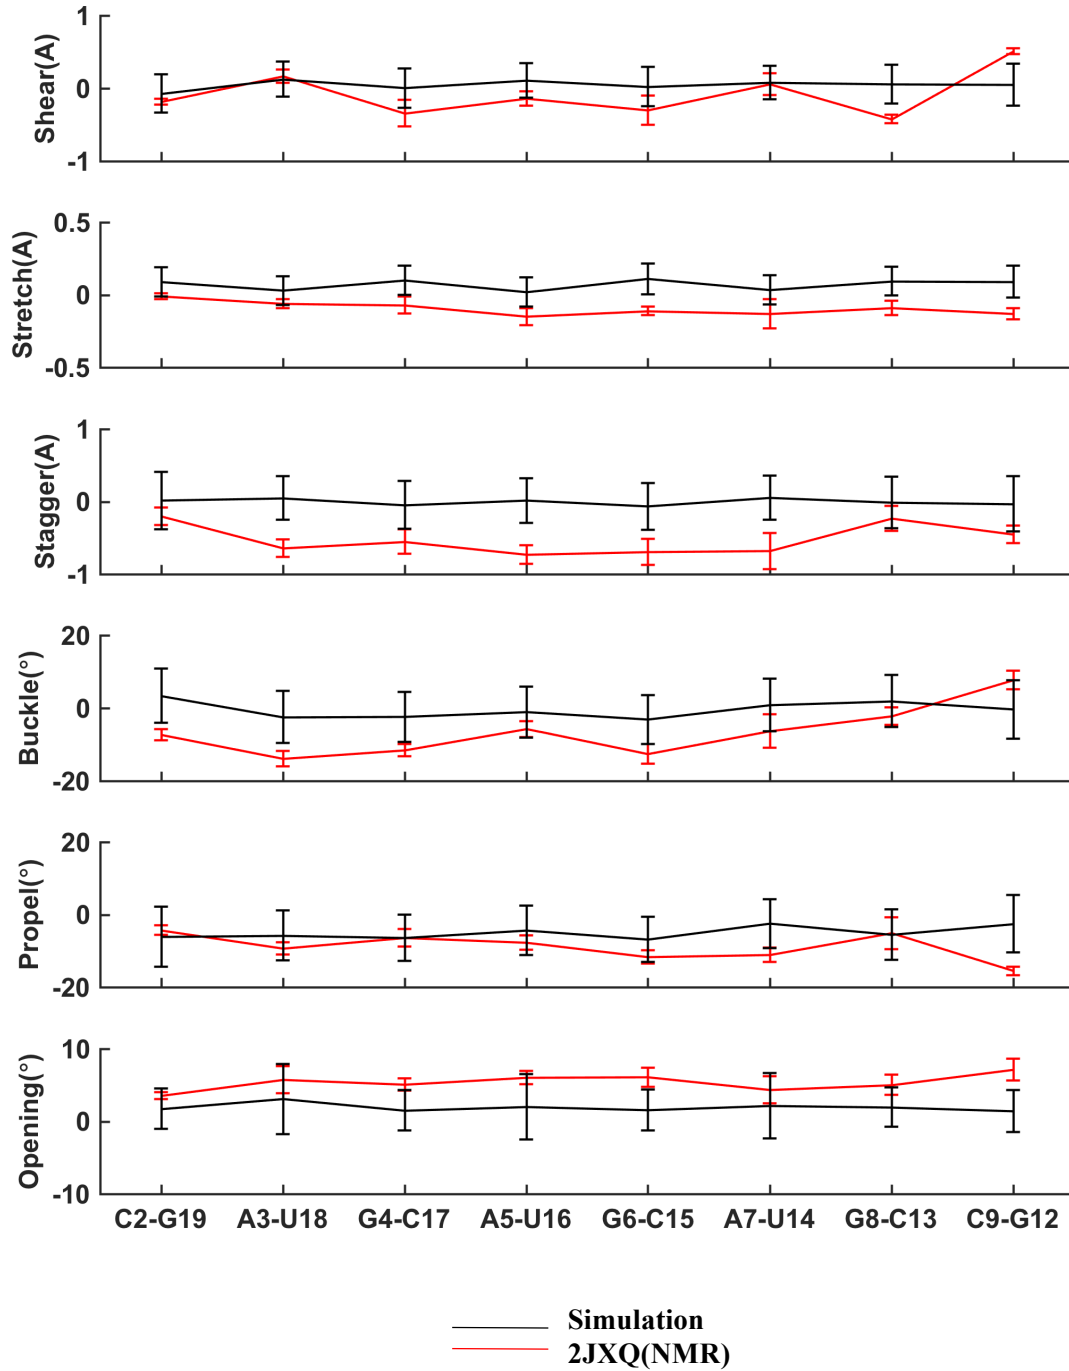

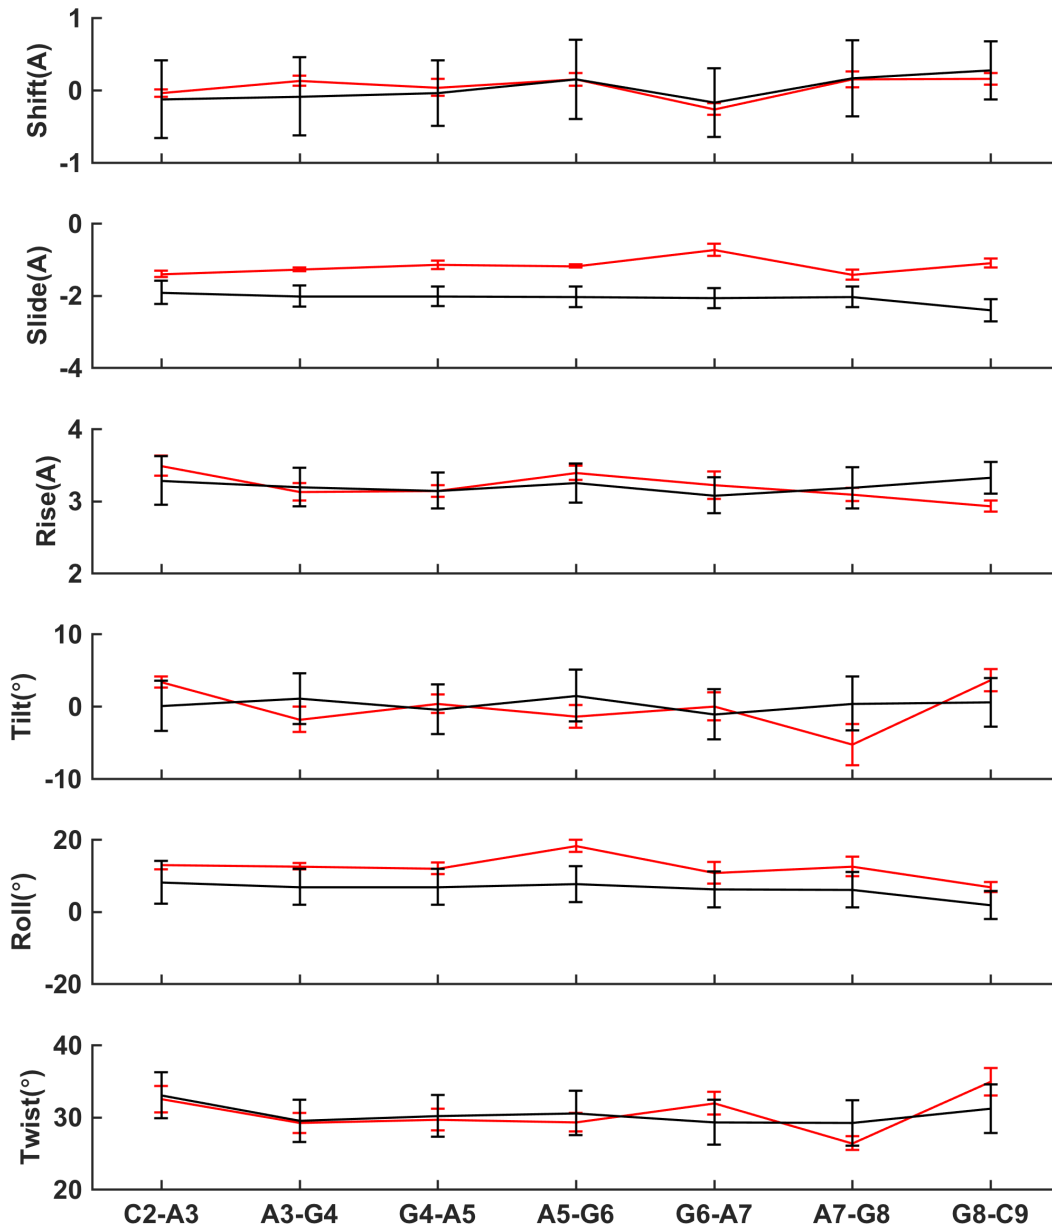

— Simulation  
 — 2JXQ(NMR)

Figure S14 Comparison of Curves+ groove widths of 1NAJ, 2HKB and 2JXQ along nucleotide position between solution-phase simulation and NMR.

(A)

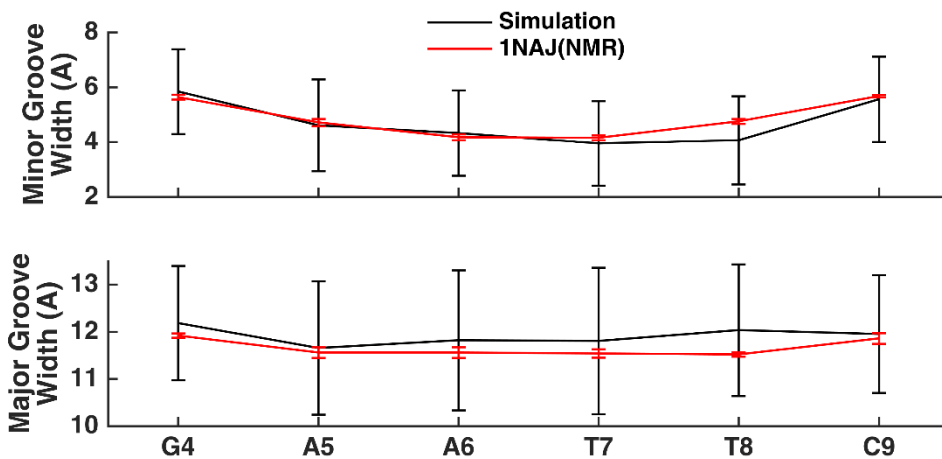

(B)

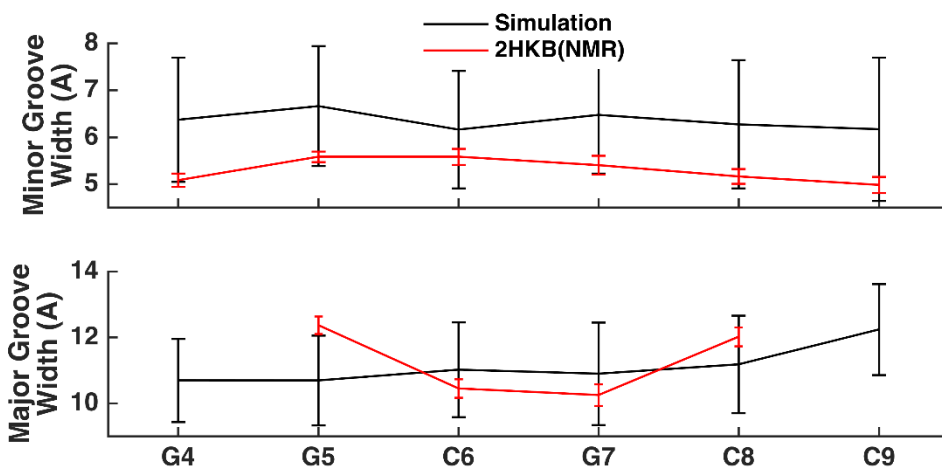

(C)

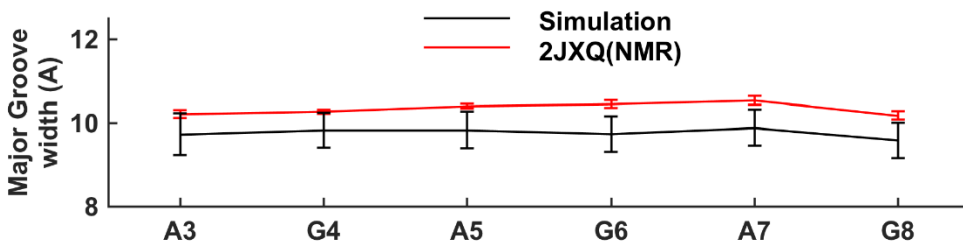



**Figure S15 Comparison of Curves+ helicoidal parameters along the nucleotide position between crystal simulation, solution simulation and X-ray structures for DNA (1D23) and RNA (1RNA)**

**(A) 1D23**

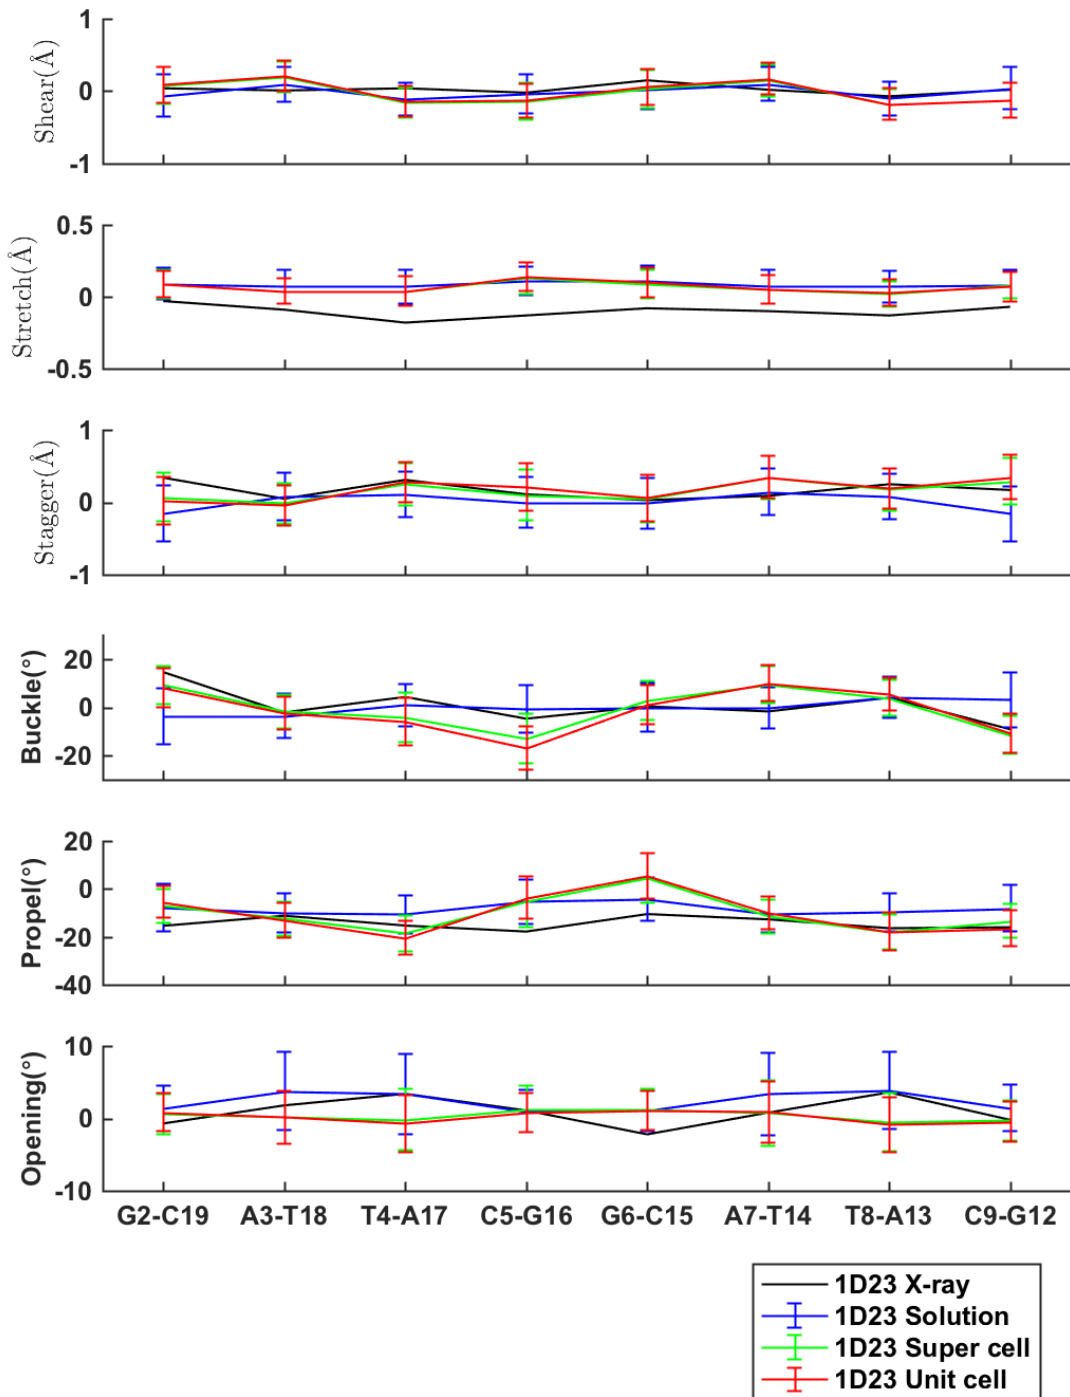

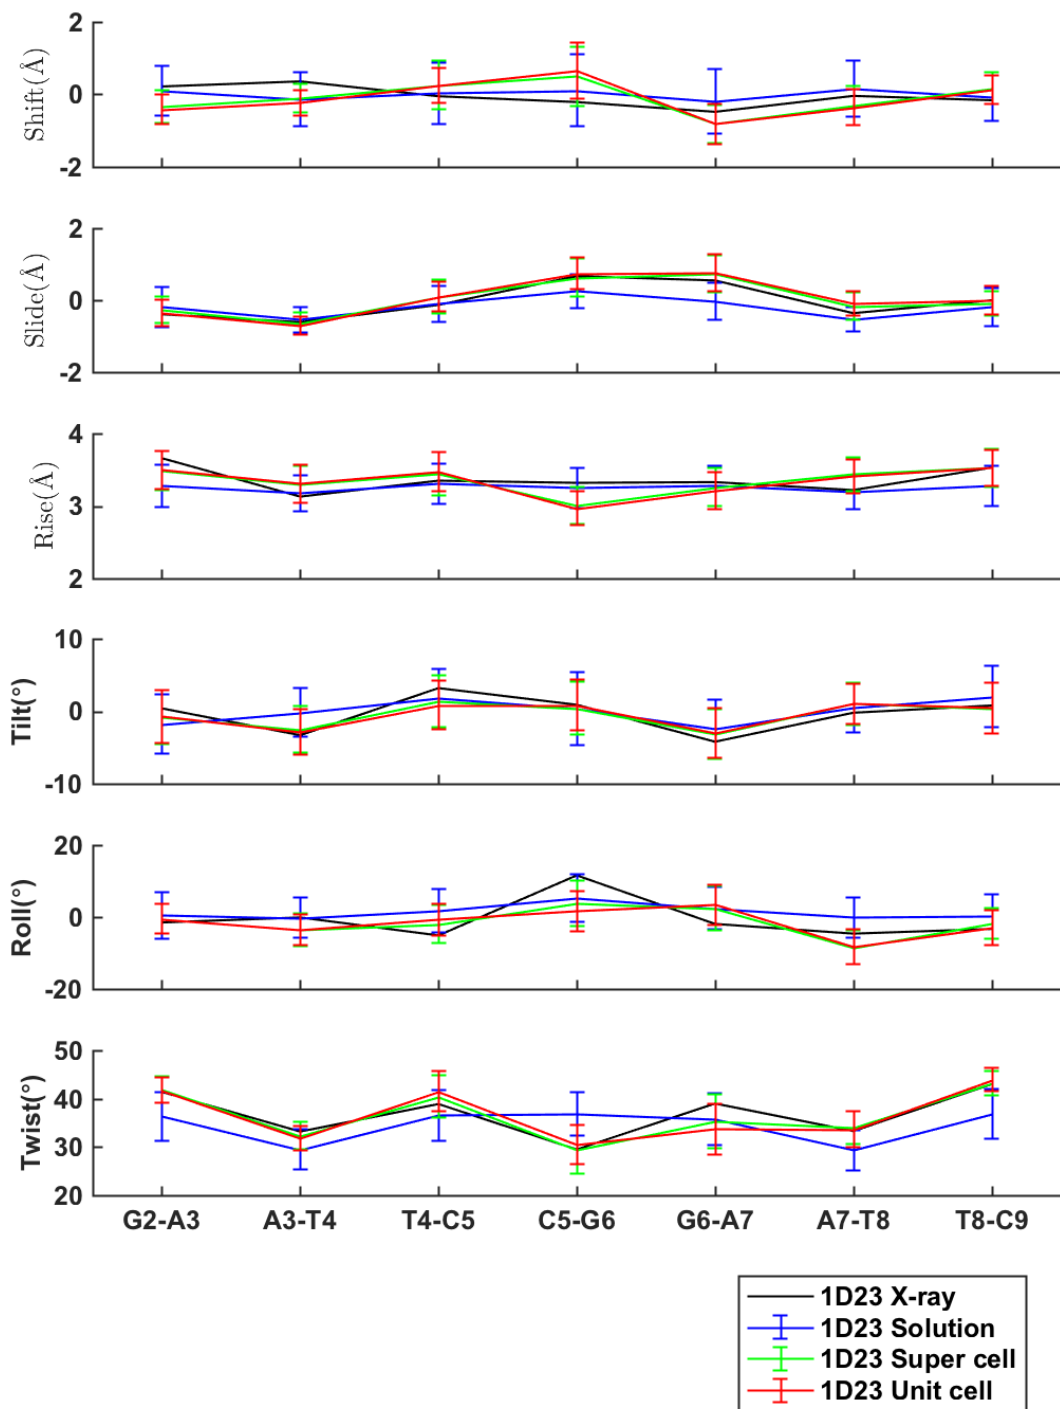

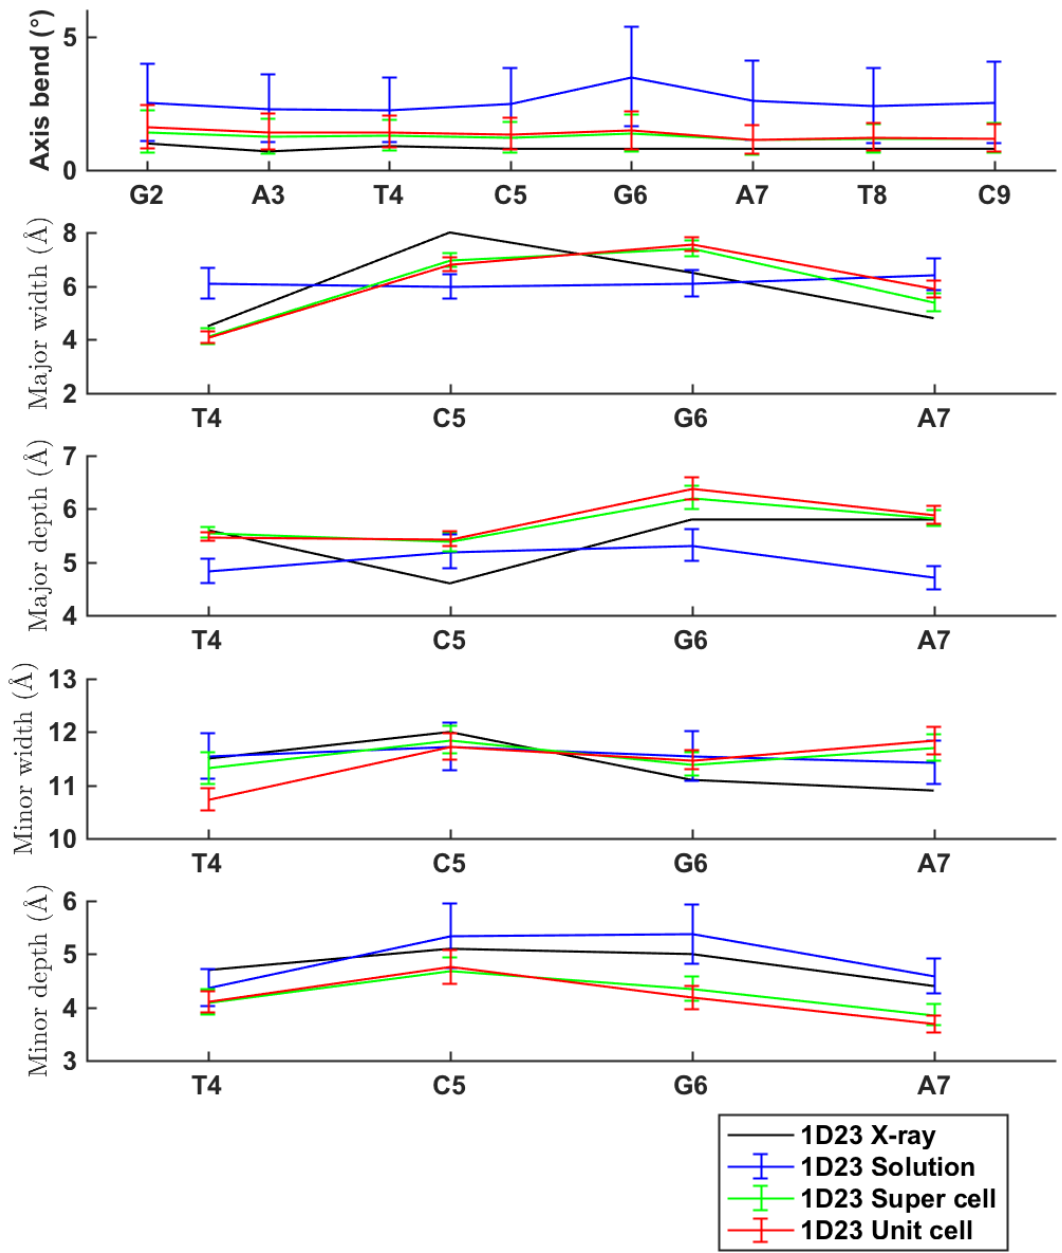

**(B) 1RNA**

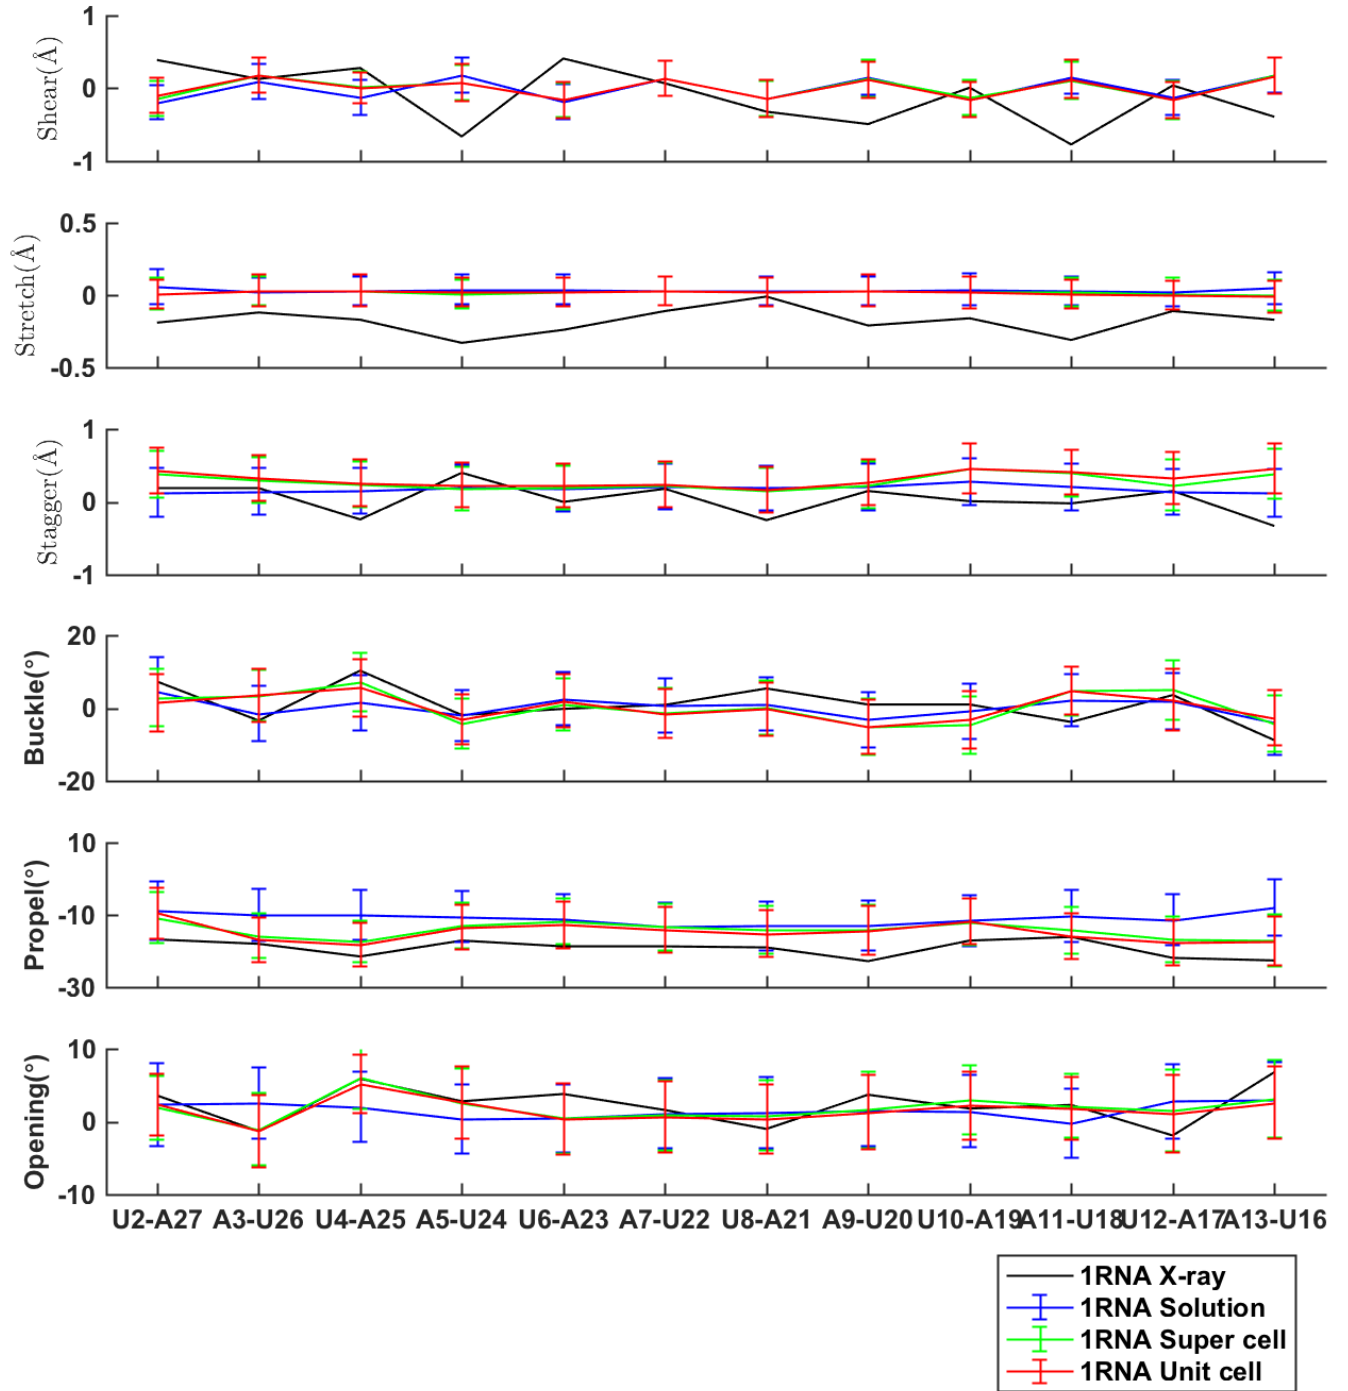

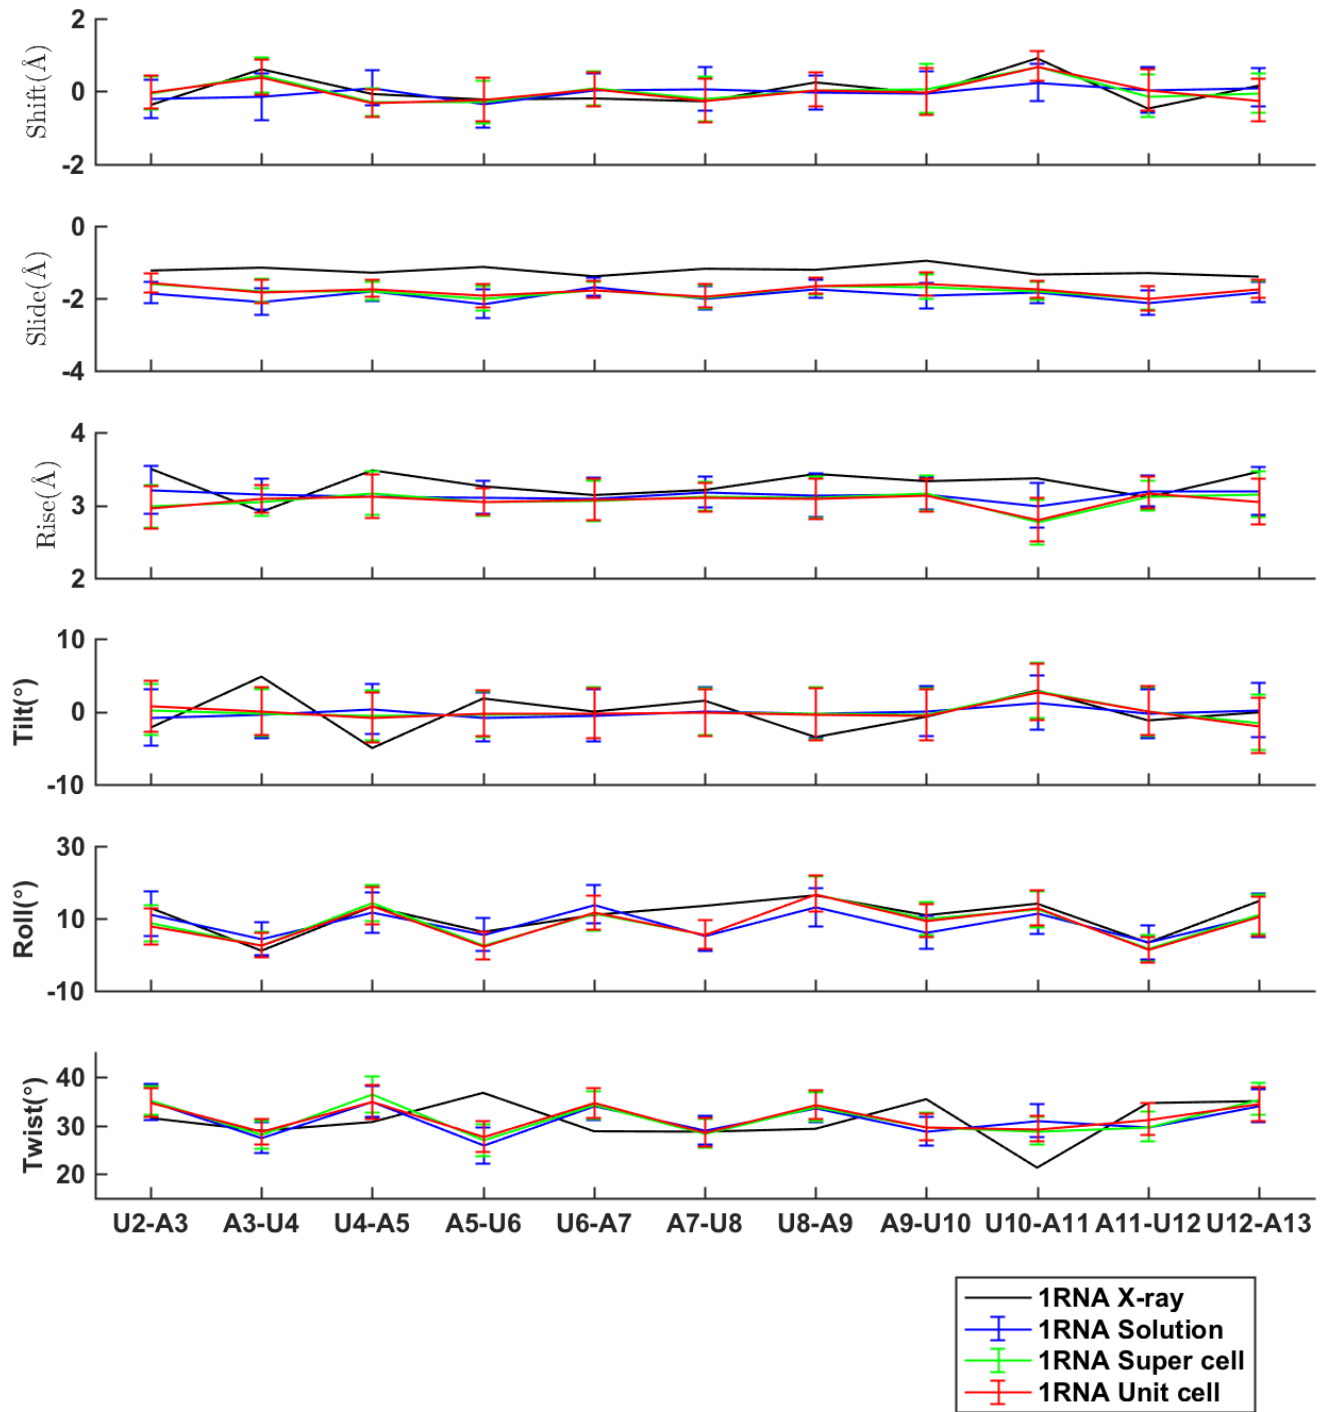

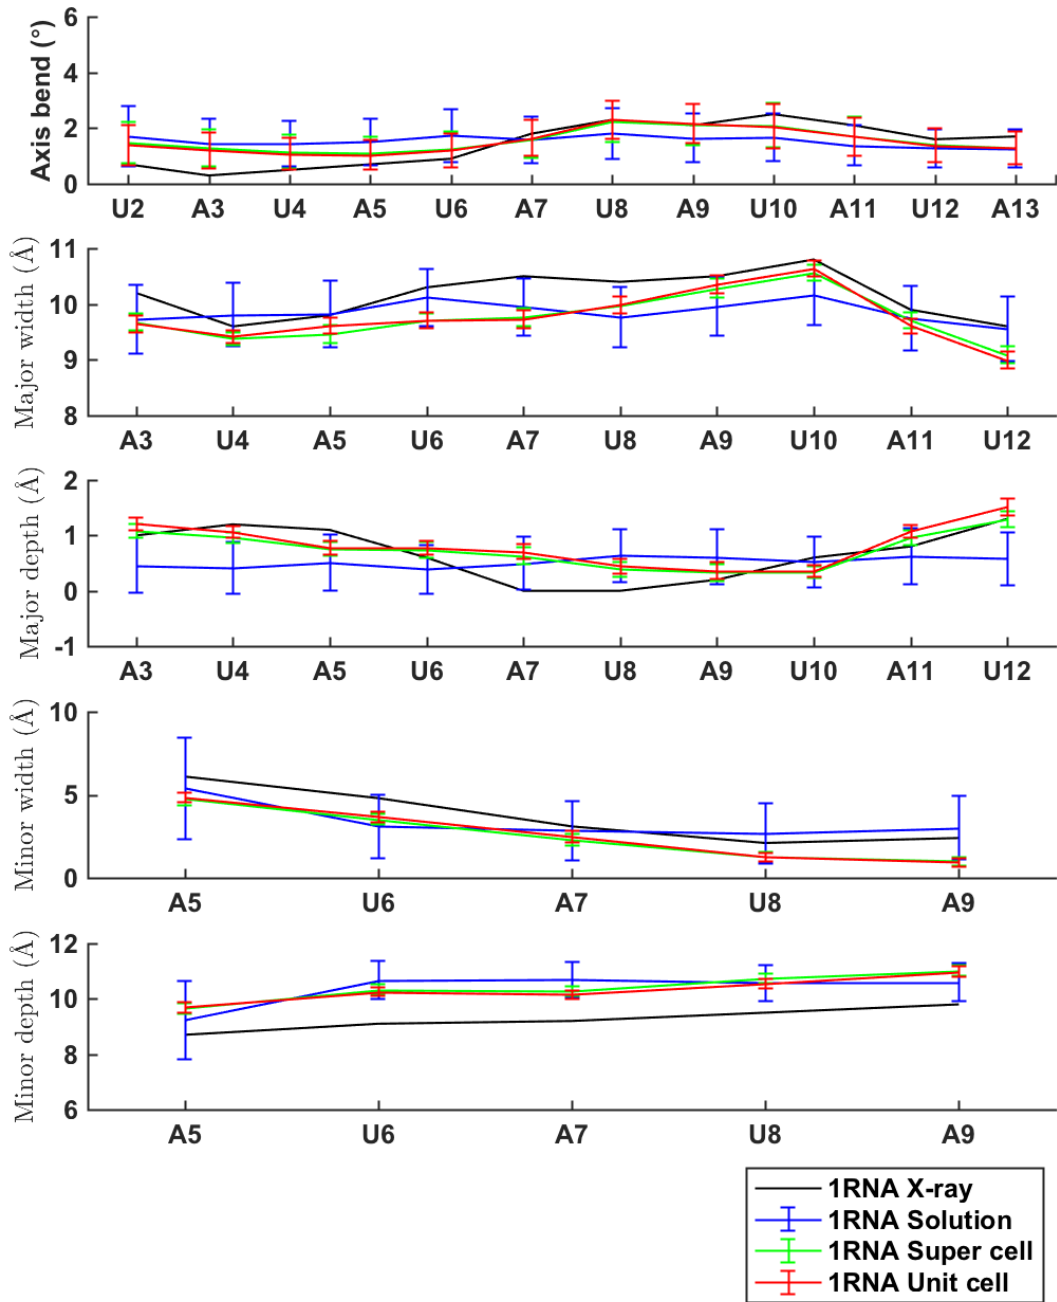

**Figure S16. The stability of the RNA terminal base-pairs or the capping base pair of hairpin stem.**

Most of these pairs are GC pair, and the distance of GN1 and CN3 atoms were used for detecting the stability of the pairs. If there is only one peak at  $\sim 3 \text{ \AA}$ , that shows the pair is quite stable, and never break up in the simulation.

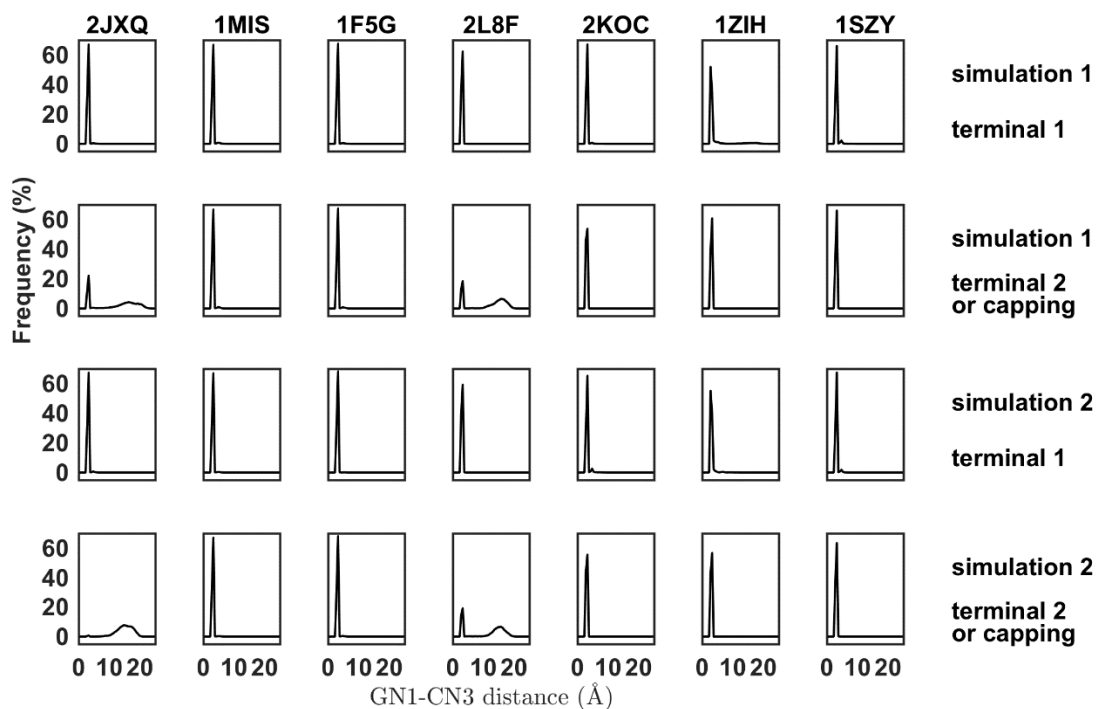

**Figure S17 Terminal base-pair breakup and reforming in 2JXQ and 2L8F simulation.**

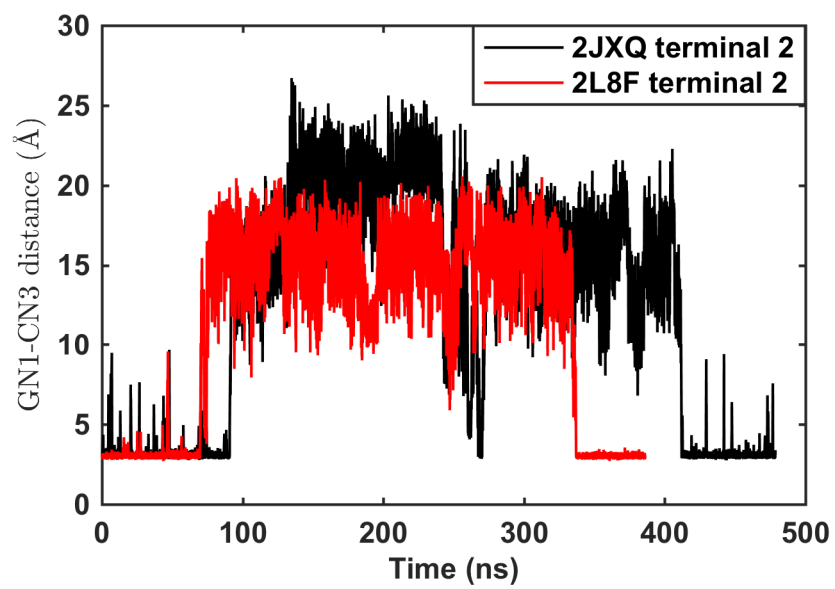



**Figure S18. Comparison of the average values of RNA backbone torsions and  $\chi$  torsion between simulated and NMR structures.**

NMR data show in black circle. Simulation data of the two independent trajectories are in red and blue lines with standard deviation. The average unsigned errors are included for each torsion.

(A) 2JXQ

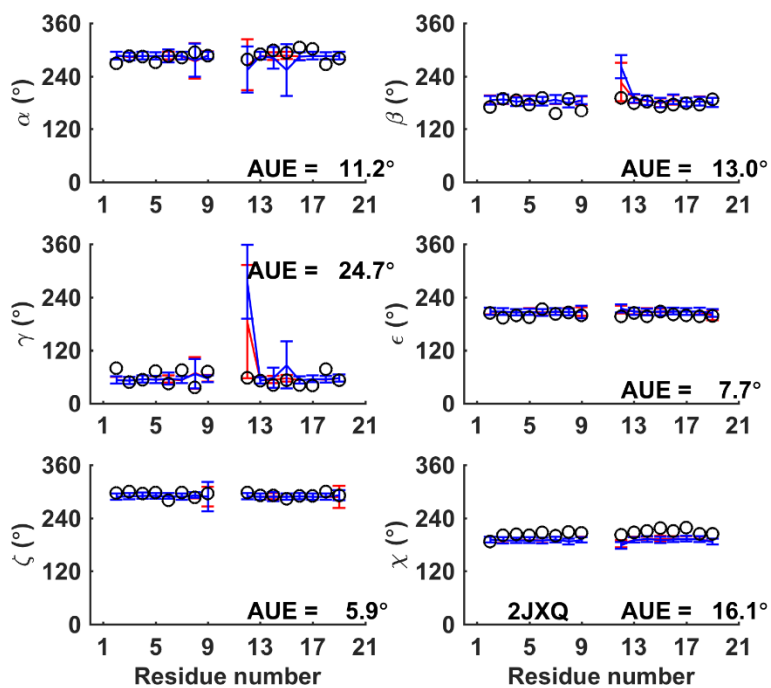

(B) 1MIS

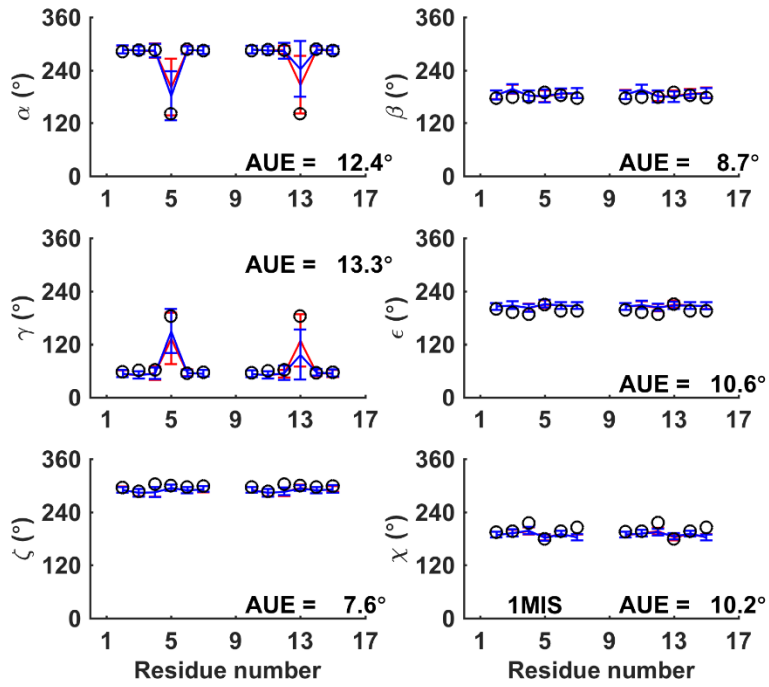

(C) 1F5G

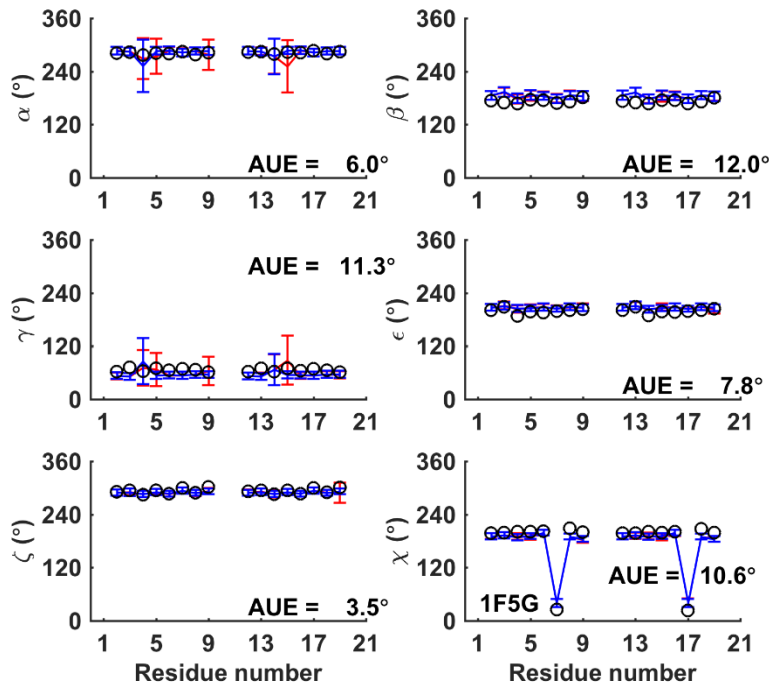

(D) 2L8F

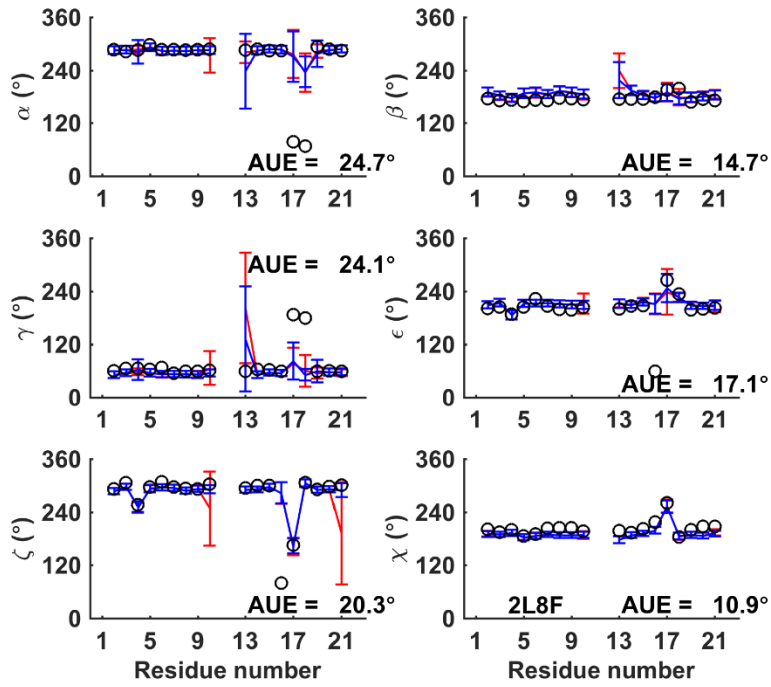

(E) 2KOC

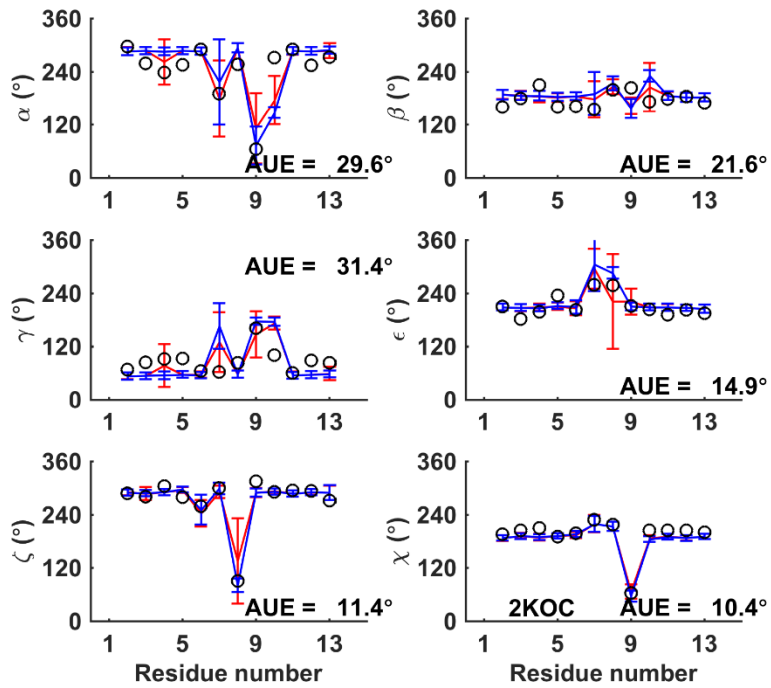

(F) 1ZIH

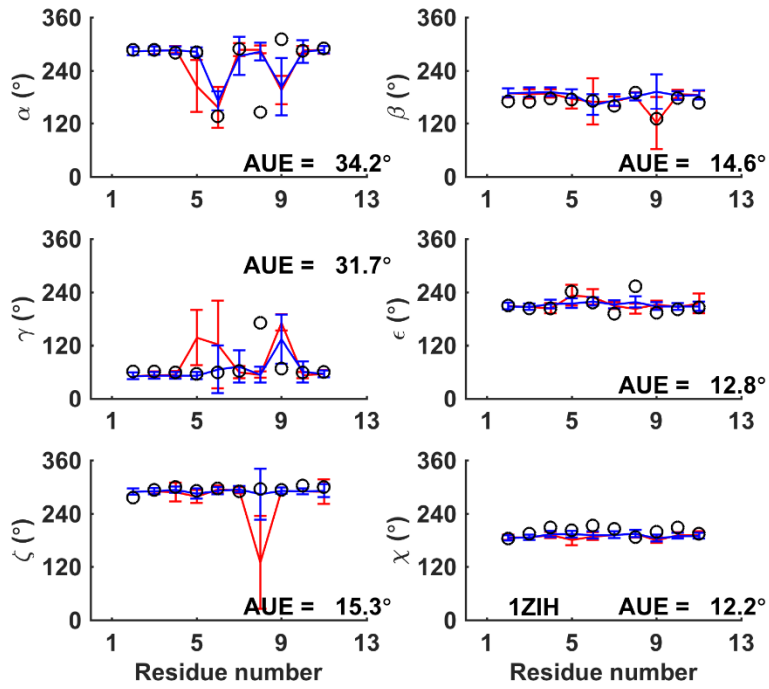

(G) 1SZY

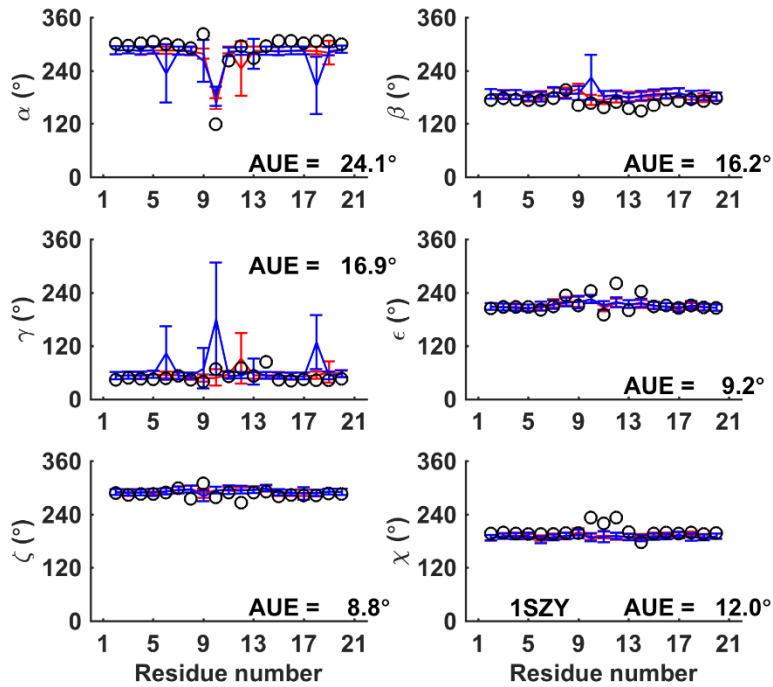

**Table S5. Axis bend and groove parameters for the 4 RNA double helices calculated from simulated and NMR structures by using Curves+ program.**

**(A) Axis bend angle**

| Axis bend (°)    | Number of Base pair | NMR        | simulation1 | simulation2 |
|------------------|---------------------|------------|-------------|-------------|
| 2JXQ<br>(all WC) | 10                  | 10.2 ± 1.2 | 18.6 ± 10.9 | 19.5 ± 8.6  |
| 1F5G             | 10                  | 46.9 ± 3.1 | 15.5 ± 8.5  | 15.7 ± 8.6  |
| 1MIS             | 8                   | 14.0       | 9.6 ± 5.0   | 9.4 ± 4.9   |
| 2L8F             | 11                  | 22.8 ± 1.7 | 32.2 ± 13.8 | 28.1 ± 11.4 |

**(B) Width and depth of the major groove**

| Groove 1 (Å) | NMR width/depth       | simulation1 width/depth | simulation2 width/depth |
|--------------|-----------------------|-------------------------|-------------------------|
| 2JXQ         | 10.3 ± 0.2; 0.7 ± 0.2 | 9.0 ± 2.9; 0.4 ± 2.4    | 9.0 ± 2.8; 0.4 ± 1.9    |
| 1F5G         | 9.8 ± 0.4; 1.7 ± 0.4  | 10.2 ± 0.5; 0.0 ± 0.6   | 10.1 ± 1.2; 0.0 ± 1.3   |
| 1MIS         | 9.8 ± 0.2; 2.0 ± 0.3  | 10.6 ± 1.6; 0.2 ± 2.3   | 10.6 ± 2.0; 0.3 ± 3.5   |
| 2L8F         | 9.0 ± 0.9; -0.2 ± 0.6 | 9.4 ± 1.1; -0.8 ± 0.7   | 9.4 ± 1.2; -0.8 ± 0.7   |

**(C) Width and depth of the minor groove**

| Groove 2<br>(Å) | NMR width/depth                | simulation1 width/depth       | simulation2<br>width/depth    |
|-----------------|--------------------------------|-------------------------------|-------------------------------|
| 2JXQ            | $2.9 \pm 0.4$ ; $9.8 \pm 0.1$  | $1.9 \pm 3.4$ ; $2.9 \pm 4.6$ | $2.2 \pm 4.2$ ; $2.0 \pm 3.9$ |
| 1F5G            | $11.4 \pm 0.7$ ; $8.0 \pm 1.0$ | $6.6 \pm 3.8$ ; $9.1 \pm 2.6$ | $6.2 \pm 3.8$ ; $8.3 \pm 3.7$ |
| 2L8F            | $7.5 \pm 1.8$ ; $4.9 \pm 3.3$  | $7.5 \pm 1.5$ ; $6.8 \pm 3.3$ | $7.4 \pm 1.6$ ; $6.7 \pm 3.3$ |

Figure S19.  $\alpha$  and  $\gamma$  torsion transitions in RNA nucleotide residues.

(A) 2KOC U7 and G9, and (B) 1MIS A5.

(A)

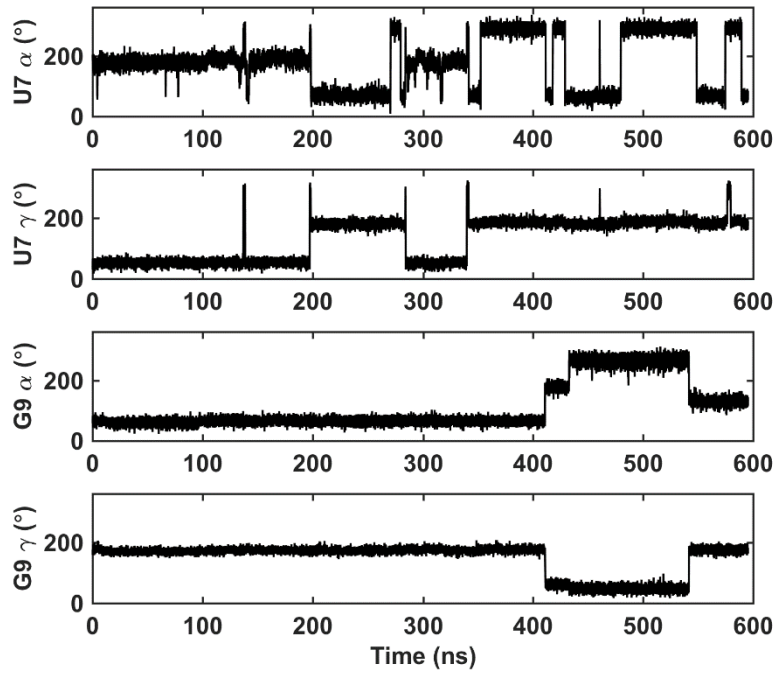

(B)

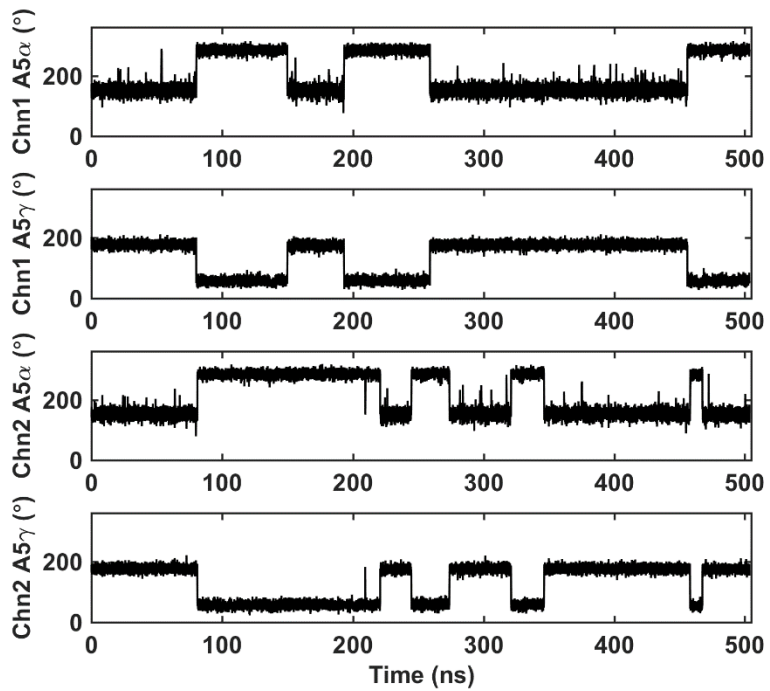

**Figure S20. UUCG loop RMSDs (all heavy atoms including backbone, sugar and base) were calculated by comparing with the first NMR (2KOC) structure.**

**The colors show different clusters in simulation, which are the same as Figure 17B. Clusters 1-5 are in black, blue, magentas, red, and green, respectively.**

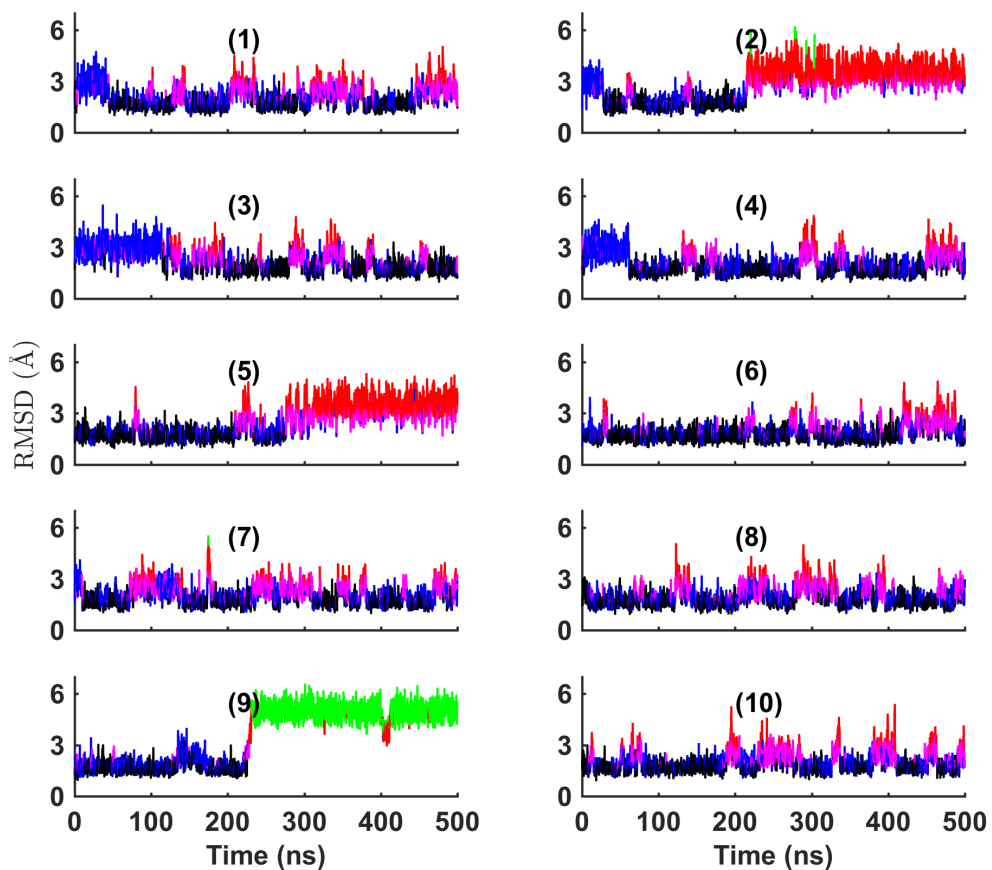



**Figure S21. Statistical population density map for ribose puckering from MD simulations of 14 RNA molecules.**

$\nu_0$  and  $\nu_4$  as the two dimensions for the map, which is the same as QM and MM energy map (see Figures 2B and S4). Contour lines show the values of  $-\ln(\text{frequency})+3.51$ , which are correlated to the free energy.

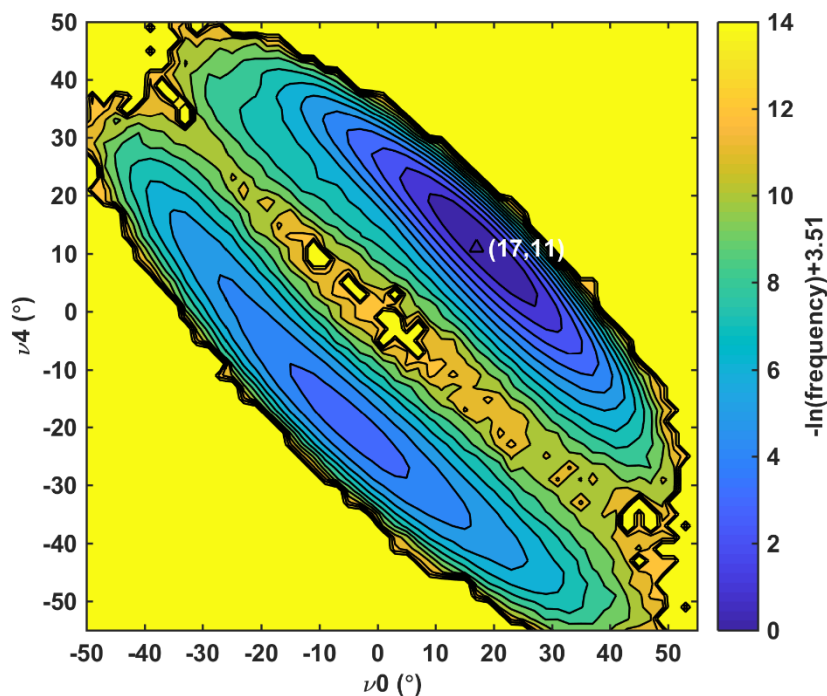

**Table S6. UUCG loop torsion angles in simulation.**

The same data used as Figure 17D in main text. The torsions with big error ( $> 30^\circ$ ) were shown in red.

| torsions  | Peaks (if two peaks, populations are showed) | NMR ( $^\circ$ ) | Error ( $^\circ$ ) |
|-----------|----------------------------------------------|------------------|--------------------|
| $\zeta_0$ | $298 \pm 5$                                  | $291 \pm 7$      | 7                  |
| $\zeta_1$ | $248 \pm 19$                                 | $262 \pm 4$      | 14                 |
| $\zeta_2$ | $288 \pm 11$ (94.5%) $88 \pm 8$ (5.5%)       | $302 \pm 8$      | 14                 |
| $\zeta_3$ | $78 \pm 7$                                   | $84 \pm 12$      | 6                  |
| $\zeta_4$ | $288 \pm 8$                                  | $325 \pm 6$      | 37                 |

|              |                  |                 |          |                        |
|--------------|------------------|-----------------|----------|------------------------|
| $\alpha_1$   | 288 ± 7          |                 | 277 ± 13 | 11                     |
| $\alpha_2$   | 183 ± 13 (88.0%) | 293 ± 8 (12.0%) | 195 ± 5  | 12                     |
| $\alpha_3$   | 293 ± 8 (92.5%)  | 163 ± 8 (5.0%)  | 268 ± 13 | 25                     |
| $\alpha_4$   | 68 ± 7           |                 | 67 ± 16  | 1                      |
| $\alpha_5$   | 148 ± 7 (94.0%)  | 288 ± 6 (6.0%)  | 266 ± 8  | Different conformation |
| $\beta_1$    | 183 ± 7          |                 | 170 ± 9  | 13                     |
| $\beta_2$    | 178 ± 17         |                 | 150 ± 6  | 28                     |
| $\beta_3$    | 198 ± 12         |                 | 198 ± 7  | 0                      |
| $\beta_4$    | 158 ± 12         |                 | 196 ± 9  | 38                     |
| $\gamma_1$   | 58 ± 6           |                 | 69 ± 10  | 11                     |
| $\gamma_2$   | 53 ± 7 (83.5%)   | 188 ± 7 (15.5%) | 62 ± 4   | 9                      |
| $\gamma_3$   | 58 ± 6 (91.5%)   | 178 ± 7 (9.0%)  | 70 ± 10  | 12                     |
| $\gamma_4$   | 178 ± 6          |                 | 163 ± 8  | 15                     |
| $\delta_1$   | 83 ± 5           |                 | 81 ± 2   | 2                      |
| $\delta_2$   | 148 ± 8          |                 | 134 ± 3  | 14                     |
| $\delta_3$   | 153 ± 6          |                 | 144 ± 3  | 9                      |
| $\delta_4$   | 93 ± 7           |                 | 82 ± 2   | 11                     |
| $\epsilon_1$ | 203 ± 10         |                 | 198 ± 6  | 5                      |
| $\epsilon_2$ | 288 ± 28         |                 | 262 ± 10 | 26                     |
| $\epsilon_3$ | 288 ± 13         |                 | 264 ± 4  | 24                     |
| $\epsilon_4$ | 208 ± 7 (94.5%)  | 283 ± 9 (5.5%)  | 205 ± 6  | 3                      |
| $\chi_1$     | 193 ± 6          |                 | 199 ± 4  | 4                      |
| $\chi_2$     | 218 ± 23         |                 | 231 ± 3  | 13                     |
| $\chi_3$     | 213 ± 9          |                 | 224 ± 4  | 11                     |
| $\chi_4$     | 53 ± 11          |                 | 58 ± 3   | 5                      |

**Table S7. Basic structural characteristic of UUCG loop and H-bond populations in simulations using AMOEBA NA and AMBER force fields.**

**The simulation data of AMBER force fields with best performance were selected from Table 2 of paper by Banas et al. (reference 122).**

| Simulations                     | $G_{L4}(N1) \dots$<br>$U_{L1}(O2)$ | $C_{L3}(N4) \dots$<br>$U_{L2}(pro-R_p)$ | $U_{L2}(O2') \dots$<br>$G_{L4}(N7)$ | $U_{L1}(O2') \dots$<br>$G_{L4}(O6)$ | $U_{L1}(O2') \dots$<br>$U_{L2}(O5')$ | $G_{L4} \chi$ (°) | $tSW$ $U_{L1}/G_{L4}$<br>propeller (°) |
|---------------------------------|------------------------------------|-----------------------------------------|-------------------------------------|-------------------------------------|--------------------------------------|-------------------|----------------------------------------|
| NMR                             | $2.7 \pm 0.1$                      | $2.9 \pm 0.1$                           | $2.9 \pm 0.1$                       | $2.6 \pm 0.1$                       | $3.4 \pm 0.1$                        | $58 \pm 4$        | $-4.3 \pm 4.5$                         |
| AMOEBA                          | 99%                                | 66%                                     | 15%                                 | 80%                                 | 0%                                   | $59 \pm 10$       | $-17 \pm 10$                           |
| Amber<br>99 $\chi$ ODE          | 90%                                | 72%                                     | 54%                                 | 94%                                 | 4%                                   | $83 \pm 13$       | $-22 \pm 11$                           |
| Amber<br>99 $\chi$ YIL          | 95%                                | 76%                                     | 41%                                 | 87%                                 | 6%                                   | $65 \pm 15$       | $1 \pm 11$                             |
| Amber<br>bsc0 $\chi$ OL-<br>DFT | 93%                                | 70%                                     | 50%                                 | 88%                                 | 9%                                   | $76 \pm 14$       | $1 \pm 11$                             |

**Table S8. Single strand RNA tetramer simulation structure clustering results.****Including RMSD, torsions, and the populations. (A) CAAU. (B) AAAA. (C) GACC**

(A)

| Cluster No. | NAME                      | RMSD vs standard A form (Å) | Torsions of cluster center ( $\zeta_3$ - $\alpha_4$ - $\gamma_4$ ) | population |
|-------------|---------------------------|-----------------------------|--------------------------------------------------------------------|------------|
| CAAU 1      | Mainly A form             | 1.0-2.5                     | G-G-G+                                                             | 79.8%      |
| CAAU 2      | NMR minor                 | 2.4-3.5                     | G-TG+                                                              | 5.6%       |
| CAAU 3      | 3-4 unstacking major      | 3.5-5.5                     | TG-G+                                                              | 7.6%       |
| CAAU 4      | 3-4 unstacking minor      | 4.5-5.5                     | TG+G+                                                              | 4.4%       |
| CAAU5       | 2-3 unstacking (unfolded) | 5.5-7                       | —                                                                  | 2.6%       |

(B)

| Cluster No. | NAME                 | RMSD vs standard A form (Å) | Torsions of cluster center ( $\zeta_3$ - $\alpha_4$ - $\gamma_4$ ) | population |
|-------------|----------------------|-----------------------------|--------------------------------------------------------------------|------------|
| AAAA 1      | Mainly A form        | 1.0-2.5 (Green)             | G-G-G+                                                             | 88.8%      |
| AAAA 2      | NMR minor            | 2.5-3.5 (Cyan)              | G-TG+                                                              | 7.0%       |
| AAAA 3      | 3-4 unstacking major | 3.5-5.5 (Magenta)           | TG-G+                                                              | 3.2%       |
| AAAA 4      | 3-4 unstacking minor | 5-6.5 (Yellow)              | G+G+G+                                                             | 1.0%       |

(C)

| Cluster No. | NAME                 | RMSD vs standard A form ( Å ) | Torsions of cluster center ( $\zeta_3$ - $\alpha_4$ - $\gamma_4$ ) | population |
|-------------|----------------------|-------------------------------|--------------------------------------------------------------------|------------|
| GACC 1      | Mainly A form        | 1.0-2.6 (Green)               | G-G-G+                                                             | 42.8%      |
| GACC 2      | NMR minor            | 2.5-3.5 (Cyan)                | G+TG+                                                              | 17.2%      |
| GACC 3      | 3-4 unstacking major | 4.0-5.5 (Magenta)             | G+G+T                                                              | 26.4%      |
| GACC 4      | 3-4 unstacking minor | 3.5-4.5 (Yellow)              | TG-G+                                                              | 13.5%      |

**Figure S22. Supposition of different RNA tetramer clusters.**

**(A) AAAA. (B) CAAU. (C) GACC. Configurational clusters 1 to 4 are in color black, blue, magentas, red, respectively.**

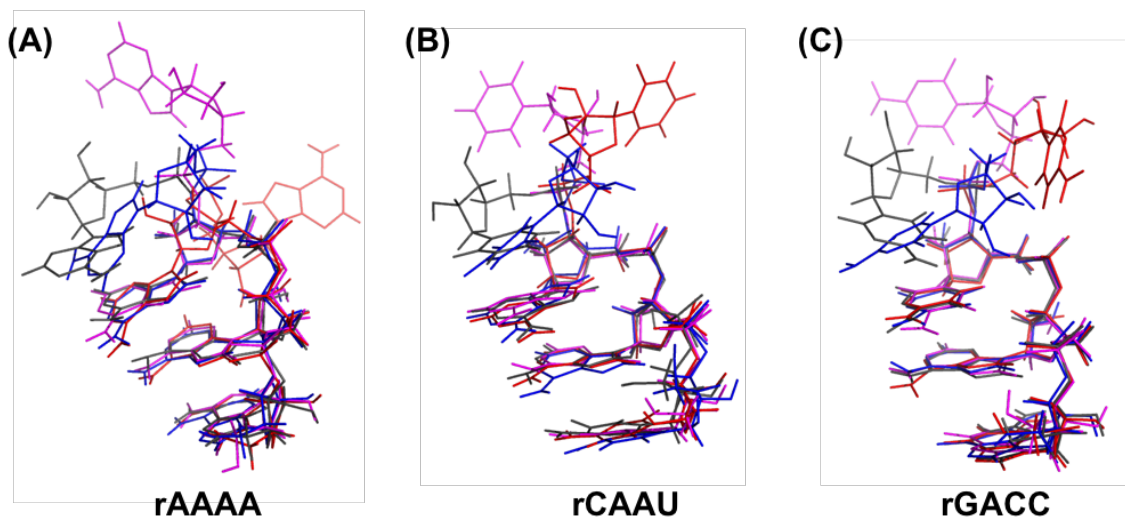

Figure S23. Single strand tetramer rCAAU simulation analysis.

(A) RMSD distribution (see RMSD calculation method in main text). (B) Torsion population compared with A-form values. (C)  $\zeta_3$ - $\alpha_4$  and  $\alpha_4$ - $\gamma_4$  statistical population maps. The contour colors show the value of the negative logarithm of the population density. The central structures in each of the 4 clusters are identified in the map.

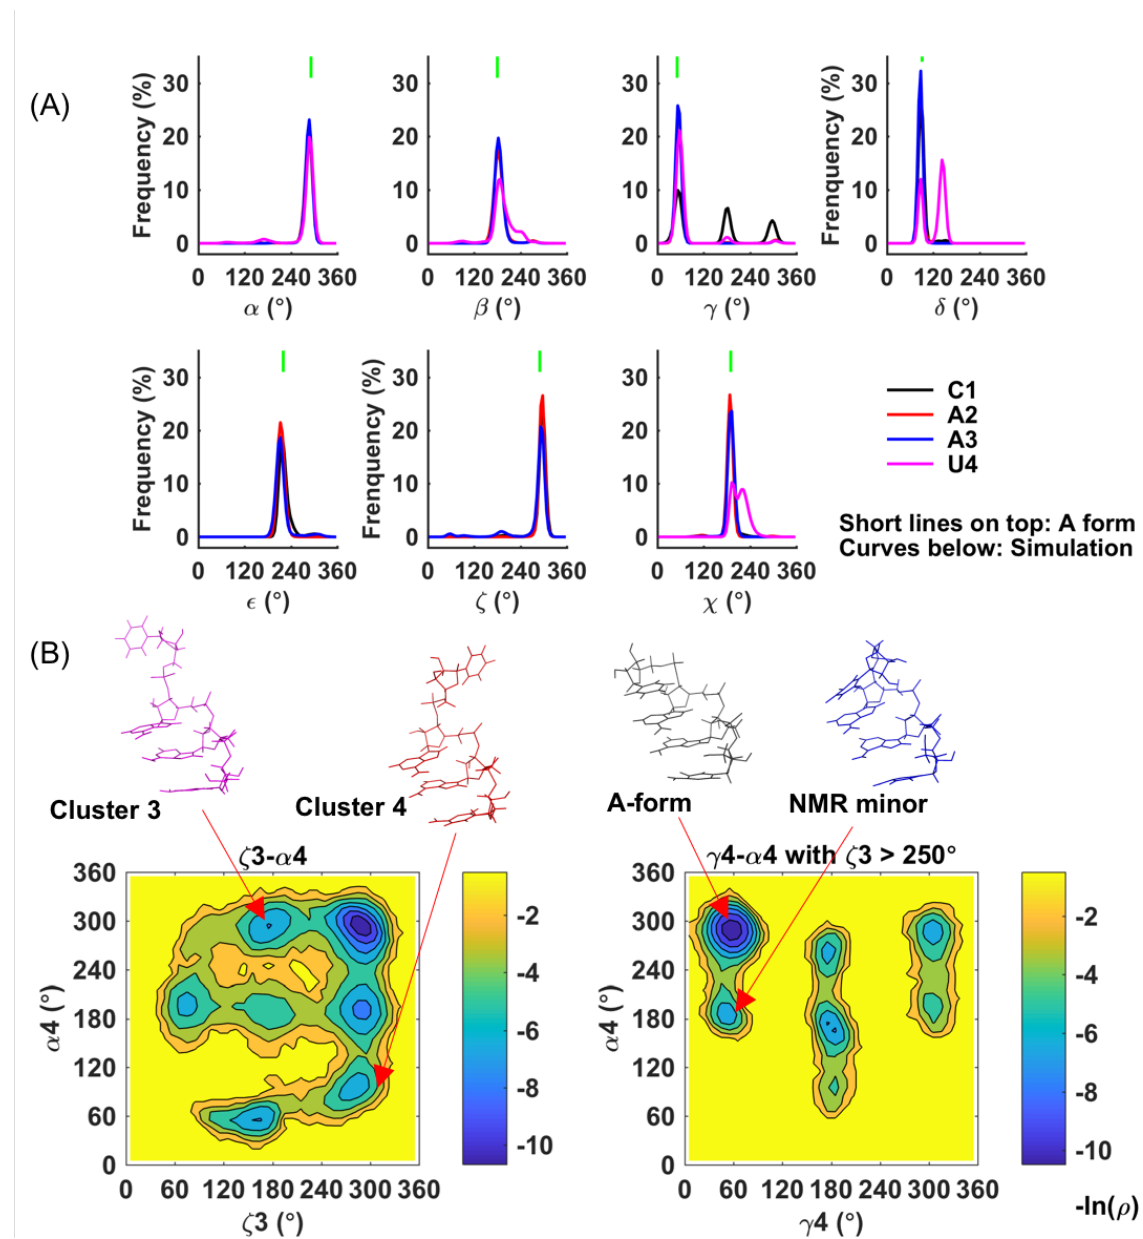

Figure S24. Single strand tetramer rAAAA simulation analysis.

(A) Torsion population compared with A-form values. (B)  $\zeta_3$ - $\alpha_4$  and  $\alpha_4$ - $\gamma_4$  torsion statistical population maps. The contour colors show the value of the negative logarithm of the population density. The central structures in each of the 4 clusters are identified in the map.

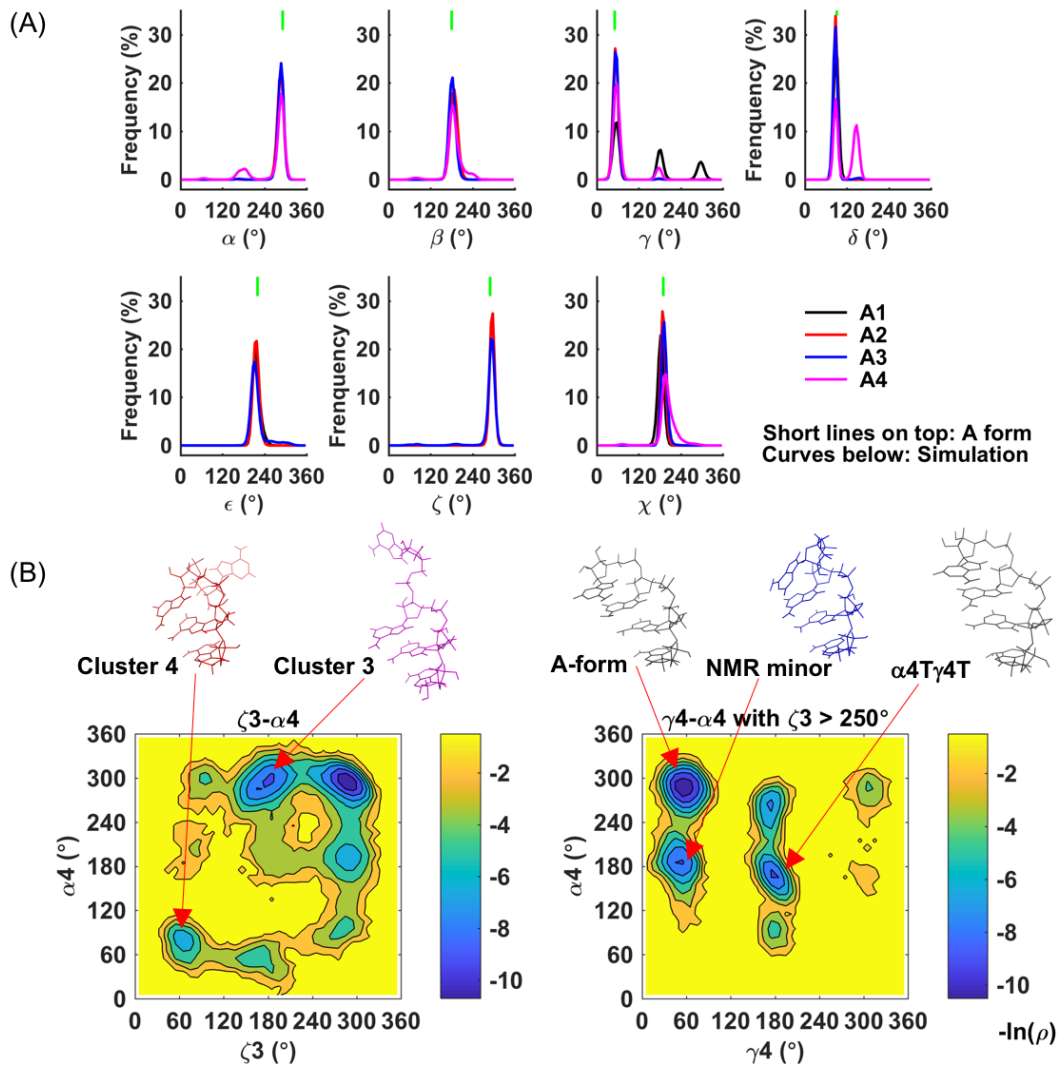

**Figure S25. Single strand RNA tetramer RMSD was calculated by comparing the simulated structures with the standard A-form structure.**

**(A) rAAAA. (B) rCAAU. (C) rGACC. The colors show different clusters in simulation: clusters 1-5 are in black, blue, magentas, red, green, respectively.**

(A)

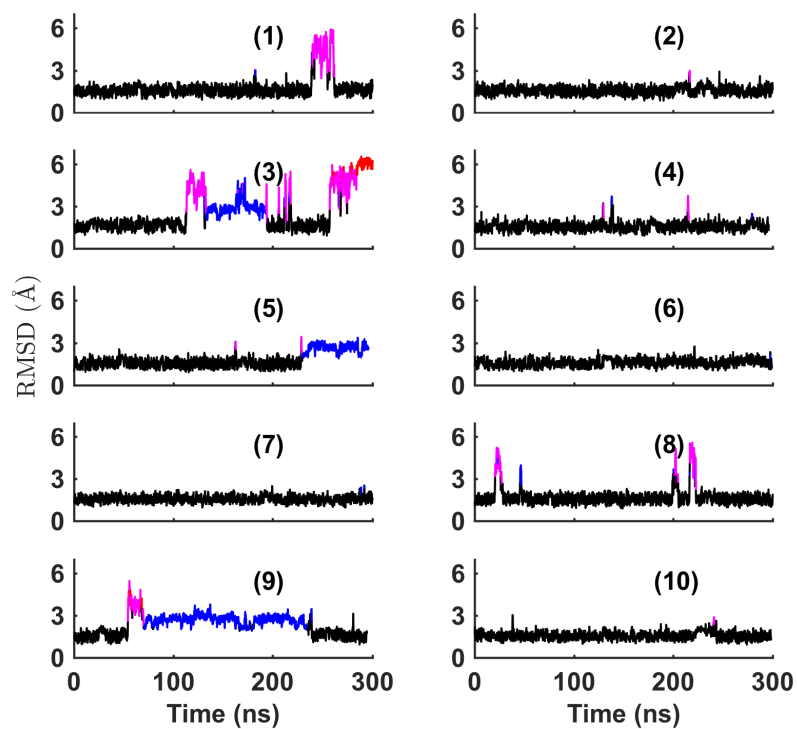



(B)

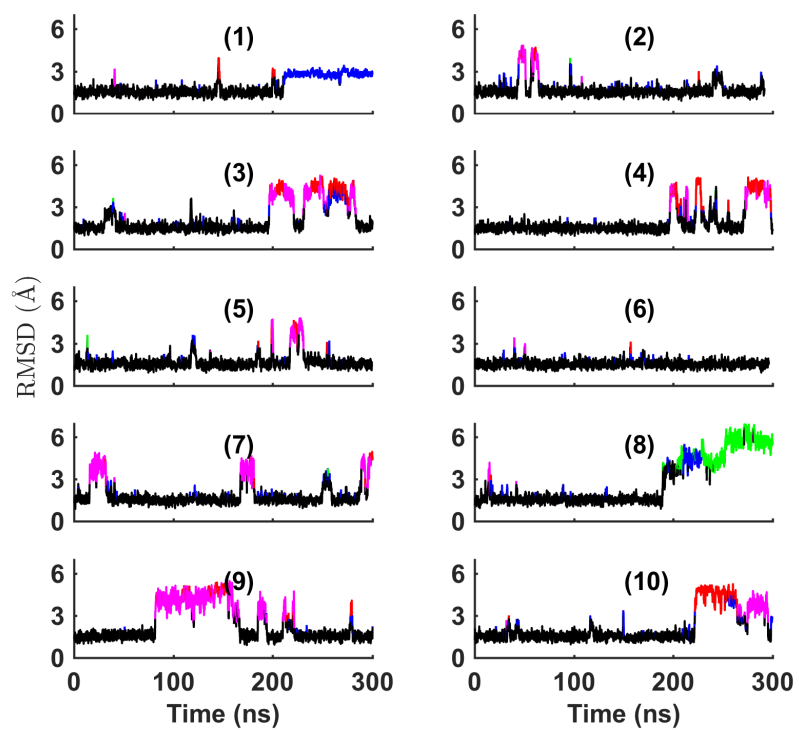

(C)

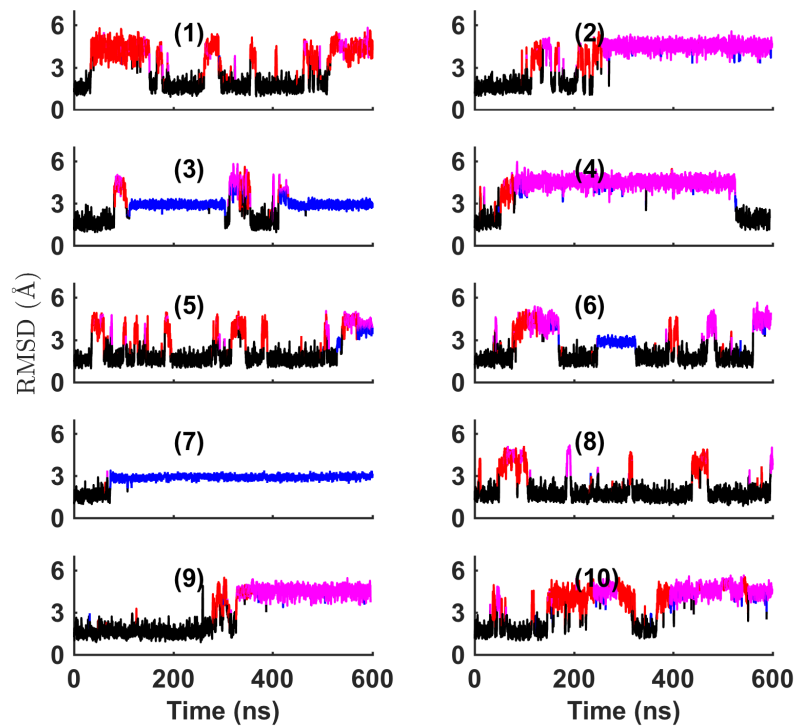

**Figure S26. Extension of the rAAA simulation trajectory 3 and UUCG loop simulation 5.**  
The colors used for indicating configurational clusters are the same as Figure S25 or S20

**(A)**

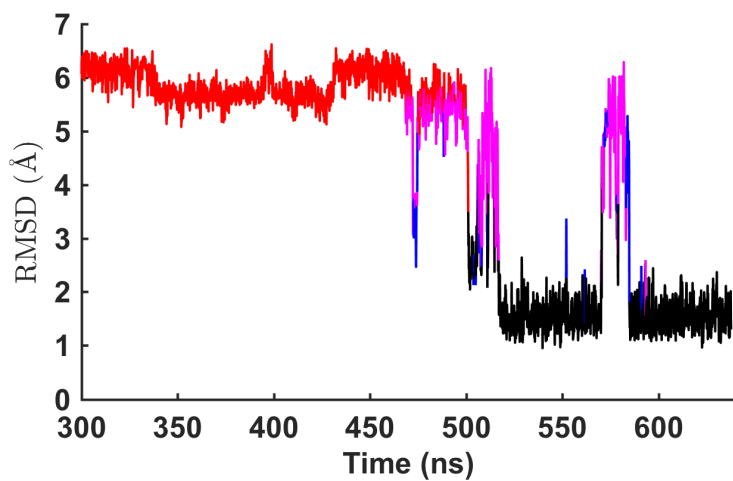

**(B)**

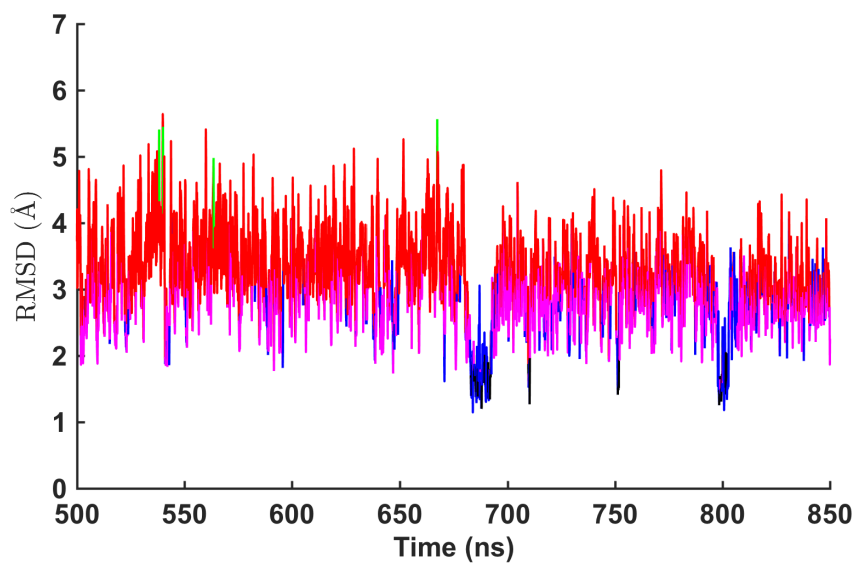

**Table S9.  $\beta$ ,  $\gamma$  Major conformation ratios in RNA tetramer simulation**

(T: 150-210; G+: 30-90) Underlined data: missed (relative error > 50%). The NMR data were taken from the SI of reference 111.

|                 | CAAU<br>(simulation) | CAAU<br>(NMR) | AAAA<br>(simulation) | AAAA<br>(NMR) | GACC<br>(simulation) | GACC<br>(NMR) |
|-----------------|----------------------|---------------|----------------------|---------------|----------------------|---------------|
| $\beta_2$ (T)   | 94.7%                | ~96%          | 98.2%                | ~100%         | 97.2%                | ~100%         |
| $\beta_3$ (T)   | 96.5%                | ~100%         | 99.4%                | ~100%         | 98.7%                | ~100%         |
| $\beta_4$ (T)   | 71.6%                | ~92%          | 84.2%                | ~100%         | <u>41.4%</u>         | <u>~95%</u>   |
| $\gamma_1$ (G+) | <u>47.4%</u>         | <u>~82%</u>   | 53.9%                | ~77%          | 45.1%                | ~66%          |
| $\gamma_2$ (G+) | 96.5%                | ~87%          | 99.2%                | ~100%         | 99.9%                | ~96%          |
| $\gamma_3$ (G+) | 97.5%                | ~93%          | 99.1%                | ~96%          | 99.9%                | ~100%         |
| $\gamma_4$ (G+) | 92.7%                | ~70%          | 89.4%                | ~96%          | <u>68.8%</u>         | <u>~100%</u>  |

**Table S10. Calculated NOE distance data for the RNA single strand tetramers.**

Calculation method:  $r_{NOE} = \left( \frac{\sum_{i=1}^N r_i^{-6}}{N} \right)^{-1/6}$ . The NMR data were taken from the SI of reference 111.

(A) CAAU: 6 of 84 missed. Missed ones are colored in red.

| No. | Peaks             | Calculation    | NMR            |
|-----|-------------------|----------------|----------------|
| 1   | <b>C1H4'-C1H6</b> | <b>&gt;6.0</b> | <b>4.8</b>     |
| 2   | C1H4'-A2H8        | 5.25           | 4.9            |
| 3   | C1H3'-C1H5        | 4.60           | No             |
| 4   | C1H3'-C1H6        | 2.86           | 3.0            |
| 5   | C1H3'-A2H4'       | 5.53           | No             |
| 6   | C1H3'-A2H3'       | 4.86           | No             |
| 7   | C1H3'-A2H1'       | 5.59           | overlap        |
| 8   | C1H3'-A2H8        | 2.39           | overlap        |
| 9   | C1H2'-C1H5        | 5.49           | No             |
| 10  | C1H2'-C1H6        | 3.71           | 3.3            |
| 11  | C1H2'-A2H4'       | 3.95           | overlap        |
| 12  | C1H2'-A2H3'       | 4.54           | No             |
| 13  | C1H2'-A2H2'       | 5.69           | Spin-Diffusion |
| 14  | C1H2'-A2H1'       | 4.02           | 4.3            |

|    |             |      |                |
|----|-------------|------|----------------|
| 15 | C1H2'-A2H8  | 2.42 | 3.2            |
| 16 | C1H1'-C1H5  | 5.24 | No             |
| 17 | C1H1'-C1H6  | 3.45 | 3.6            |
| 18 | C1H1'-A2H1' | 5.85 | >5.0           |
| 19 | C1H1'-A2H8  | 4.76 | 5.5            |
| 20 | C1H5 -A2H8  | 4.80 | No             |
| 21 | C1H6 -A2H8  | 4.24 | 4.7            |
| 22 | A2H4'-A2H8  | 4.24 | 4.4            |
| 23 | A2H4'-A3H8  | 5.34 | No             |
| 24 | A2H3'-A2H8  | 2.88 | 3.0            |
| 25 | A2H3'-A2H2  | 5.95 | No             |
| 26 | A2H3'-A3H4' | 5.73 | No             |
| 27 | A2H3'-A3H3' | 4.92 | Spin-Diffusion |
| 28 | A2H3'-A3H1' | 5.84 | No             |
| 29 | A2H3'-A3H8  | 2.56 | 2.7            |
| 30 | A2H3'-U4H5  | 5.85 | No             |
| 31 | A2H2'-A2H8  | 4.03 | 3.3            |
| 32 | A2H2'-A2H2  | 4.51 | 5.2            |
| 33 | A2H2'-A3H4' | 3.98 | 3.8            |
| 34 | A2H2'-A3H3' | 4.35 | Spin-Diffusion |
| 35 | A2H2'-A3H2' | 5.54 | Spin-Diffusion |
| 36 | A2H2'-A3H1' | 3.97 | 3.8            |
| 37 | A2H2'-A3H8  | 2.35 | 2.7            |
| 38 | A2H1'-A2H8  | 3.55 | 3.7            |
| 39 | A2H1'-A2H2  | 4.82 | 4.5            |
| 40 | A2H1'-A3H1' | 5.77 | No             |
| 41 | A2H1'-A3H8  | 4.68 | 4.9            |
| 42 | A2H8 -A3H2' | >6.0 | >5.0           |
| 43 | A2H8 -A3H8  | 4.43 | No             |
| 44 | A2H2 -A3H4' | 5.75 | No             |
| 45 | A2H2 -A3H3' | 4.92 | No             |
| 46 | A2H2 -A3H2' | 5.18 | No             |
| 47 | A2H2 -A3H1' | 2.96 | 3.9            |
| 48 | A2H2 -A3H8  | 4.89 | No             |
| 49 | A2H2 -A3H2  | 5.13 | No             |
| 50 | A3H4'-A3H8  | 4.25 | 4.6            |
| 51 | A3H4'-U4H2' | >6.0 | 4.8            |
| 52 | A3H4'-U4H6  | 5.70 | No             |
| 53 | A3H3'-A3H8  | 2.84 | 2.7            |

|    |             |      |         |
|----|-------------|------|---------|
| 54 | A3H3'-U4H4' | 5.69 | No      |
| 55 | A3H3'-U4H3' | 5.08 | No      |
| 56 | A3H3'-U4H2' | 3.73 | 3.0     |
| 57 | A3H3'-U4H5  | 3.46 | 3.9     |
| 58 | A3H3'-U4H6  | 2.96 | 3.1     |
| 59 | A3H2'-A3H8  | 4.13 | 3.2     |
| 60 | A3H2'-A3H2  | 4.55 | No      |
| 61 | A3H2'-U4H4' | 4.14 | 3.3     |
| 62 | A3H2'-U4H3' | 4.91 | No      |
| 63 | A3H2'-U4H2' | 4.76 | No      |
| 64 | A3H2'-U4H1' | 4.48 | 4.6     |
| 65 | A3H2'-U4H5  | 3.81 | 3.4     |
| 66 | A3H2'-U4H6  | 2.54 | 3.0     |
| 67 | A3H1'-A3H8  | 3.61 | 3.7     |
| 68 | A3H1'-A3H2  | 4.77 | 5.4     |
| 69 | A3H1'-U4H5  | 5.55 | No      |
| 70 | A3H1'-U4H6  | 5.10 | No      |
| 71 | A3H8 -U4H2' | 4.93 | 3.9     |
| 72 | A3H8 -U4H5  | 4.00 | 4.3     |
| 73 | A3H8 -U4H6  | 4.87 | 4.9     |
| 74 | A3H2 -U4H2' | 5.80 | No      |
| 75 | A3H2 -U4H1' | 3.54 | 4.5     |
| 76 | A3H2 -U4H5  | 4.67 | No      |
| 77 | A3H2 -U4H6  | 4.97 | No      |
| 78 | U4H4'-U4H6  | 4.18 | No      |
| 79 | U4H3'-U4H5  | 5.25 | No      |
| 80 | U4H3'-U4H6  | 3.23 | overlap |
| 81 | U4H2'-U4H5  | 4.71 | overlap |
| 82 | U4H2'-U4H6  | 2.65 | No      |
| 83 | U4H1'-U4H5  | 5.35 | No      |
| 84 | U4H1'-U4H6  | 3.56 | 3.6     |

(B) AAAA: 16 of 80 missed. Missed ones are colored in red.

| No. | Peaks       | Calculation | NMR |
|-----|-------------|-------------|-----|
| 1   | A1H4'-A2H8  | 5.29        | No  |
| 2   | A1H3'-A1H8  | 3.07        | 3.4 |
| 3   | A1H3'-A2H4' | 5.73        | No  |
| 4   | A1H3'-A2H3' | 4.94        | No  |
| 5   | A1H3'-A2H1' | 5.83        | No  |
| 6   | A1H3'-A2H8  | 2.48        | No  |

|    |             |      |     |
|----|-------------|------|-----|
| 7  | A1H2'-A1H8  | 4.33 | 3.6 |
| 8  | A1H2'-A1H2  | 4.34 | No  |
| 9  | A1H2'-A2H4' | 4.07 | 4.6 |
| 10 | A1H2'-A2H3' | 4.51 | No  |
| 11 | A1H2'-A2H2' | 5.68 | No  |
| 12 | A1H2'-A2H1' | 4.08 | 4.5 |
| 13 | A1H2'-A2H8  | 2.33 | 3.0 |
| 14 | A1H1'-A1H8  | 3.56 | 3.3 |
| 15 | A1H1'-A1H2  | 4.87 | No  |
| 16 | A1H1'-A2H1' | 5.94 | No  |
| 17 | A1H1'-A2H8  | 4.69 | 4.8 |
| 18 | A1H8 -A2H8  | 4.60 | No  |
| 19 | A1H2 -A2H4' | 5.55 | No  |
| 20 | A1H2 -A2H2' | 5.47 | No  |
| 21 | A1H2 -A2H1' | 2.83 | 3.8 |
| 22 | A1H2 -A2H8  | 4.51 | No  |
| 23 | A1H2 -A2H2  | 5.41 | No  |
| 24 | A2H4'-A2H8  | 4.23 | 5.0 |
| 25 | A2H4'-A3H8  | 5.29 | No  |
| 26 | A2H3'-A2H8  | 2.92 | 3.0 |
| 27 | A2H3'-A3H4' | 5.68 | No  |
| 28 | A2H3'-A3H3' | 4.96 | No  |
| 29 | A2H3'-A3H1' | 5.75 | No  |
| 30 | A2H3'-A3H8  | 2.50 | 2.9 |
| 31 | A2H2'-A2H8  | 4.21 | No  |
| 32 | A2H2'-A2H2  | 4.54 | No  |
| 33 | A2H2'-A3H4' | 3.93 | No  |
| 34 | A2H2'-A3H3' | 4.40 | No  |
| 35 | A2H2'-A3H2' | 5.48 | No  |
| 36 | A2H2'-A3H1' | 3.90 | No  |
| 37 | A2H2'-A3H8  | 2.35 | No  |
| 38 | A2H2'-A4H3' | 5.62 | No  |
| 39 | A2H1'-A2H8  | 3.62 | 3.7 |
| 40 | A2H1'-A2H2  | 4.79 | No  |
| 41 | A2H1'-A3H1' | 5.70 | No  |
| 42 | A2H1'-A3H8  | 4.73 | 4.7 |
| 43 | A2H8 -A3H8  | 4.40 | No  |
| 44 | A2H2 -A3H4' | 5.75 | No  |
| 45 | A2H2 -A3H2' | 5.60 | No  |
| 46 | A2H2 -A3H1' | 2.94 | 4.1 |
| 47 | A2H2 -A3H8  | 4.97 | No  |

|    |             |      |     |
|----|-------------|------|-----|
| 48 | A2H2 -A3H2  | 5.16 | No  |
| 49 | A3H4'-A3H8  | 4.24 | No  |
| 50 | A3H4'-A4H3' | 5.66 | No  |
| 51 | A3H4'-A4H2' | 5.81 | No  |
| 52 | A3H4'-A4H8  | 5.46 | No  |
| 53 | A3H3'-A3H8  | 2.83 | No  |
| 54 | A3H3'-A4H4' | 5.54 | No  |
| 55 | A3H3'-A4H3' | 4.49 | No  |
| 56 | A3H3'-A4H2' | 3.23 | 3.2 |
| 57 | A3H3'-A4H1' | 5.80 | No  |
| 58 | A3H3'-A4H8  | 2.69 | 3.1 |
| 59 | A3H3'-A4H2  | 5.41 | No  |
| 60 | A3H2'-A3H8  | 4.01 | No  |
| 61 | A3H2'-A3H2  | 4.63 | No  |
| 62 | A3H2'-A4H4' | 3.98 | No  |
| 63 | A3H2'-A4H3' | 4.61 | No  |
| 64 | A3H2'-A4H2' | 4.23 | No  |
| 65 | A3H2'-A4H1' | 4.12 | No  |
| 66 | A3H2'-A4H8  | 2.48 | No  |
| 67 | A3H1'-A3H8  | 3.66 | 3.8 |
| 68 | A3H1'-A3H2  | 4.75 | No  |
| 69 | A3H1'-A4H8  | 4.97 | 5.6 |
| 70 | A3H8 -A4H2' | 4.54 | 4.4 |
| 71 | A3H8 -A4H8  | 4.58 | No  |
| 72 | A3H2 -A4H1' | 3.38 | 4.8 |
| 73 | A3H2 -A4H8  | 5.17 | No  |
| 74 | A3H2 -A4H2  | 4.93 | No  |
| 75 | A4H4'-A4H8  | 4.31 | 4.7 |
| 76 | A4H3'-A4H8  | 3.10 | No  |
| 77 | A4H2'-A4H8  | 3.03 | 3.0 |
| 78 | A4H2'-A4H2  | 5.03 | No  |
| 79 | A4H1'-A4H8  | 3.61 | 3.8 |
| 80 | A4H1'-A4H2  | 4.68 | No  |

(C) GACC: 8 of 82 missed. Missed ones are colored in red.

| No. | Peaks       | Calculation | NMR  |
|-----|-------------|-------------|------|
| 1   | G1H4'-A2H8  | 5.33        | >5.0 |
| 2   | G1H3'-G1H8  | 3.17        | 3.7  |
| 3   | G1H3'-A2H4' | 5.84        | No   |
| 4   | G1H3'-A2H3' | 5.01        | No   |

|    |             |      |         |
|----|-------------|------|---------|
| 5  | G1H3'-A2H8  | 2.58 | overlap |
| 6  | G1H3'-C3H5  | 5.25 | No      |
| 7  | G1H2'-G1H8  | 4.40 | 3.4     |
| 8  | G1H2'-A2H4' | 4.18 | 3.2     |
| 9  | G1H2'-A2H3' | 4.55 | >5.0    |
| 10 | G1H2'-A2H2' | 5.78 | >5.0    |
| 11 | G1H2'-A2H1' | 4.24 | >5.0    |
| 12 | G1H2'-A2H8  | 2.28 | 2.7     |
| 13 | G1H1'-G1H8  | 3.52 | 3.4     |
| 14 | G1H1'-A2H1' | >6.0 | >5.0    |
| 15 | G1H1'-A2H8  | 4.66 | 4.2     |
| 16 | G1H8 -A2H8  | 4.83 | >5.0    |
| 17 | A2H4'-A2H8  | 4.23 | 3.5     |
| 18 | A2H4'-C3H6  | 5.41 | 4.2     |
| 19 | A2H3'-A2H8  | 2.97 | overlap |
| 20 | A2H3'-C3H4' | 5.72 | No      |
| 21 | A2H3'-C3H3' | 4.95 | >5.0    |
| 22 | A2H3'-C3H1' | 5.89 | No      |
| 23 | A2H3'-C3H5  | 3.11 | No      |
| 24 | A2H3'-C3H6  | 2.67 | 2.6     |
| 25 | A2H3'-C4H5  | 5.68 | No      |
| 26 | A2H2'-A2H8  | 4.24 | overlap |
| 27 | A2H2'-A2H2  | 4.48 | No      |
| 28 | A2H2'-C3H4' | 4.01 | >5.0    |
| 29 | A2H2'-C3H3' | 4.45 | 3.7     |
| 30 | A2H2'-C3H2' | 5.54 | No      |
| 31 | A2H2'-C3H1' | 4.09 | 3.6     |
| 32 | A2H2'-C3H5  | 4.11 | No      |
| 33 | A2H2'-C3H6  | 2.32 | 2.5     |
| 34 | A2H1'-A2H8  | 3.61 | 4.1     |
| 35 | A2H1'-A2H2  | 4.80 | >5.0    |
| 36 | A2H1'-C3H1' | 5.94 | No      |
| 37 | A2H1'-C3H5  | 5.64 | No      |
| 38 | A2H1'-C3H6  | 4.74 | No      |
| 39 | A2H8 -C3H2' | >6.0 | >5.0    |
| 40 | A2H8 -C3H5  | 3.78 | 4.1     |
| 41 | A2H8 -C3H6  | 4.63 | No      |
| 42 | A2H2 -C3H4' | 5.72 | No      |
| 43 | A2H2 -C3H2' | 5.70 | No      |
| 44 | A2H2 -C3H1' | 3.02 | 3.7     |
| 45 | A2H2 -C3H5  | 5.65 | No      |



|    |             |      |            |
|----|-------------|------|------------|
| 46 | A2H2 -C3H6  | 4.73 | No         |
| 47 | C3H4'-C3H6  | 4.06 | No         |
| 48 | C3H4'-C4H6  | 5.81 | No         |
| 49 | C3H4'-C4H2' | >6.0 | overlap    |
| 50 | C3H3'-C3H5  | 4.53 | No         |
| 51 | C3H3'-C3H6  | 2.74 | 2.4        |
| 52 | C3H3'-C4H4' | 5.36 | No         |
| 53 | C3H3'-C4H3' | 4.43 | No         |
| 54 | C3H3'-C4H2' | 3.00 | overlap    |
| 55 | C3H3'-C4H5  | 3.58 | No         |
| 56 | C3H3'-C4H6  | 2.97 | 2.8        |
| 57 | C3H2'-C3H5  | 5.40 | No         |
| 58 | C3H2'-C3H6  | 3.67 | 3.0        |
| 59 | C3H2'-C4H4' | 4.61 | overlap    |
| 60 | C3H2'-C4H3' | 5.34 | No         |
| 61 | C3H2'-C4H2' | 4.79 | No         |
| 62 | C3H2'-C4H1' | 5.08 | Line Noise |
| 63 | C3H2'-C4H5  | 3.53 | overlap    |
| 64 | C3H2'-C4H6  | 2.84 | 2.7        |
| 65 | C3H1'-C3H5  | 5.28 | No         |
| 66 | C3H1'-C3H6  | 3.49 | 3.3        |
| 67 | C3H1'-C4H5  | 5.66 | No         |
| 68 | C3H1'-C4H6  | 5.53 | No         |
| 69 | C3H5 -C4H2' | 4.66 | No         |
| 70 | C3H5 -C4H5  | 3.92 | No         |
| 71 | C3H5 -C4H6  | 5.47 | No         |
| 72 | C3H6 -C4H3' | 5.98 | >5.0       |
| 73 | C3H6 -C4H2' | 4.03 | 3.8        |
| 74 | C3H6 -C4H5  | 4.18 | No         |
| 75 | C3H6 -C4H6  | 4.92 | No         |
| 76 | C4H4'-C4H6  | 4.18 | No         |
| 77 | C4H3'-C4H5  | 5.67 | No         |
| 78 | C4H3'-C4H6  | 3.51 | 2.6        |
| 79 | C4H2'-C4H5  | 4.70 | No         |
| 80 | C4H2'-C4H6  | 2.60 | 2.8        |
| 81 | C4H1'-C4H5  | 5.35 | No         |
| 82 | C4H1'-C4H6  | 3.57 | 2.8        |

**Table S11. RDC data studied for HIV TAR.**

| Residue | H-C bond | Experimental RDC |
|---------|----------|------------------|
| 18G     | H8-C8    | -1.538           |
| 19C     | H5-C5    | -0.755           |
| 20A     | H8-C8    | -1.162           |
| 20A     | H1'-C1'  | 1.265            |
| 21G     | H8-C8    | -1.567           |
| 22A     | H8-C8    | -1.624           |
| 22A     | H2-C2    | -0.518           |
| 22A     | H1'-C1'  | 0.314            |
| 26G     | H8-C8    | -1.32            |
| 27A     | H8-C8    | -1.447           |
| 27A     | H2-C2    | -0.979           |
| 27A     | H1'-C1'  | 2.101            |
| 28G     | H8-C8    | -1.509           |
| 29C     | H5-C5    | -1.162           |
| 29C     | H6-C6    | -0.926           |
| 32U     | H1'-C1'  | -0.118           |
| 34G     | H1'-C1'  | -0.655           |
| 36G     | H8-C8    | -1.433           |
| 37C     | H5-C5    | -1.194           |
| 38U     | H5-C5    | 0.197            |
| 39C     | H5-C5    | 0.374            |
| 40U     | H1'-C1'  | 1.37             |
| 42U     | H5-C5    | -0.98            |
| 43G     | H8-C8    | -0.929           |
| 44C     | H5-C5    | 0.047            |

Figure S27. Correlation between calculated order parameters and the experimental values.

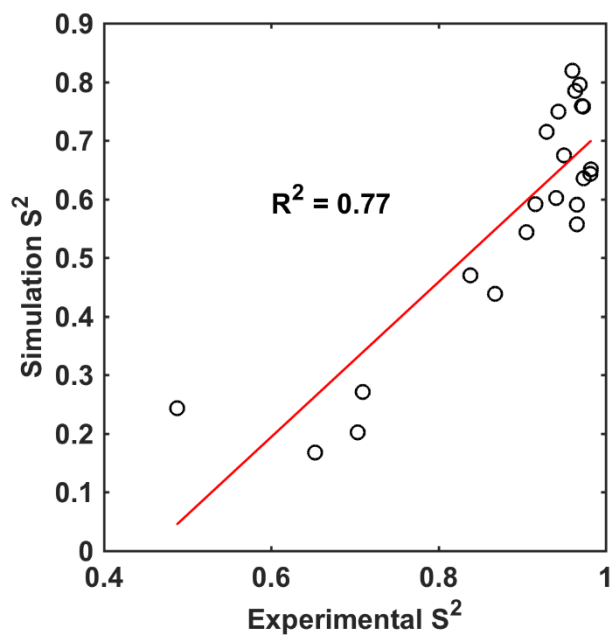

**Figure S28. Correlation coefficients between RDC calculated from the first 4 TAR PDB structures and the experimental values.**

The PDB (NMR) structure of HIV TAR, 1ANR, was deposited on PDB in 1996 and the residual dipolar coupling data was collected later, in 2003 (reference 123). The different sources of the 1ANR structures and the residual dipolar coupling data may be responsible for the poor correlation.

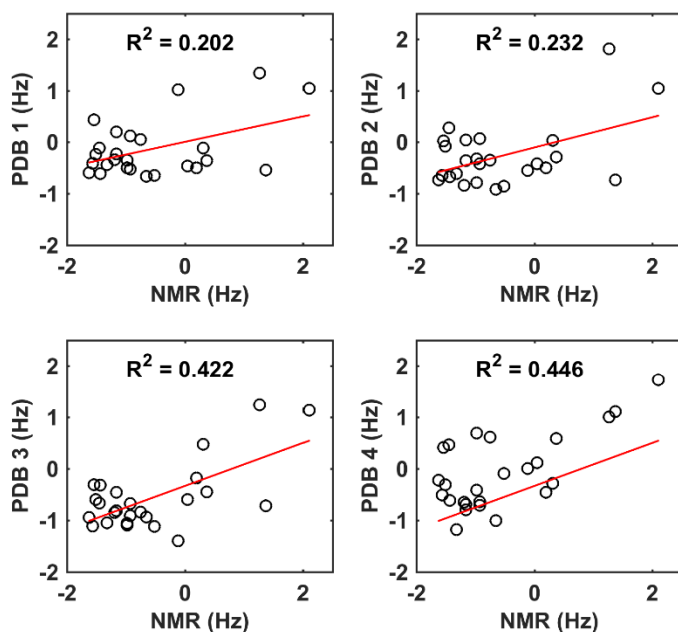

Figure S29. Correlation coefficients of calculated and experimental TAR RDC values.

The first 8 panel shows the calculated result for each of the 8 trajectories. Each of the first 4 NMR structures was selected as the starting structure of 2 trajectories. For example, the first two trajectories were starting from the first NMR structure.

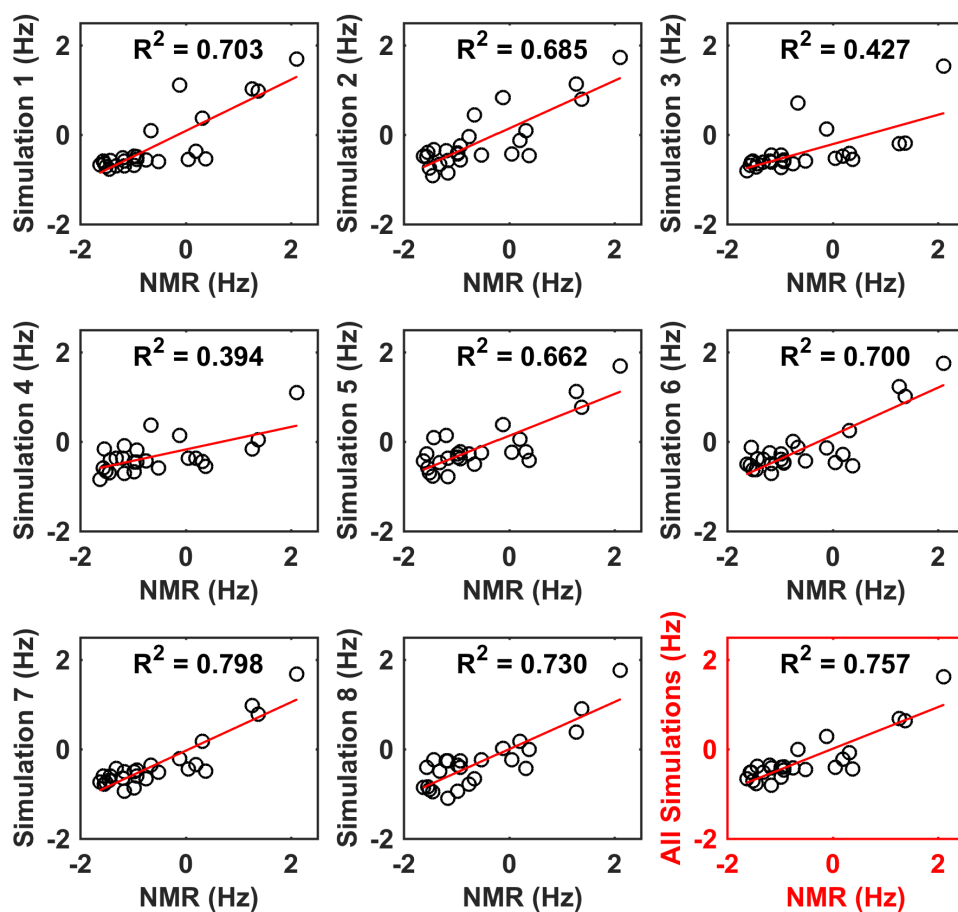

**Figure S30. Polarization energy of adenine stacking in single strand A form RNA.**

The standard A-form RNA  $-(A)_n$  – was first built, and then the backbone and sugars were trimmed off, with only stacking adenines left. The energy here refers to interaction energy (total energy minus the sum of monomer energy). The average induced dipole on each adenine was  $\sim 0.47$  Debye.

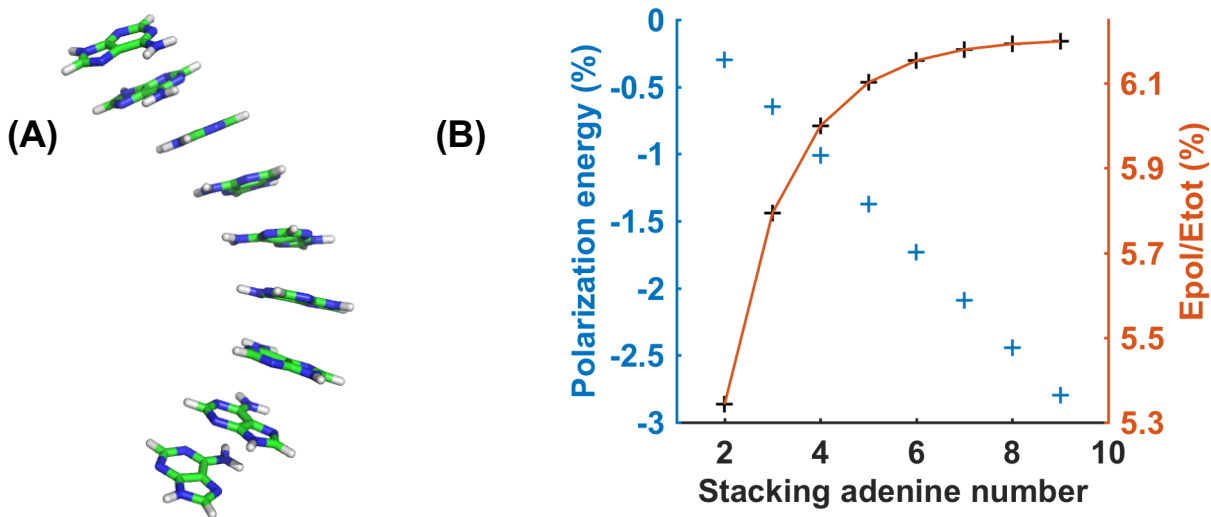

Supplement: NIHMS953045-supplement-SI.pdf [file NIHMS953045-supplement-SI.pdf]
